# Supplementary material for: Setting the top 10 priorities for obesity and weight-related research (POWeR): a stakeholder priority setting process
Source: PubMed Central journal article supplement (PMC9305808; doi:10.1136/bmjopen-2021-058177), 2022-07-20
Supplement: bmjopen-2021-058177.draft_revisions.pdf [file bmjopen-2021-058177.draft_revisions.pdf]

# BMJ Open

BMJ Open is committed to open peer review. As part of this commitment we make the peer review history of every article we publish publicly available.

When an article is published we post the peer reviewers' comments and the authors' responses online. We also post the versions of the paper that were used during peer review. These are the versions that the peer review comments apply to.

The versions of the paper that follow are the versions that were submitted during the peer review process. They are not the versions of record or the final published versions. They should not be cited or distributed as the published version of this manuscript.

BMJ Open is an open access journal and the full, final, typeset and author-corrected version of record of the manuscript is available on our site with no access controls, subscription charges or pay-per-view fees (<http://bmjopen.bmj.com>).

If you have any questions on BMJ Open's open peer review process please email [info.bmjopen@bmj.com](mailto:info.bmjopen@bmj.com)

# BMJ Open

## Setting the top 10 priorities for obesity and weight-related research (POWeR): a stakeholder priority setting process

|                               |                                                                                                                                                                                                                                                                                                                                                                                                                                                                                                                                                                                                                                                                                  |
|-------------------------------|----------------------------------------------------------------------------------------------------------------------------------------------------------------------------------------------------------------------------------------------------------------------------------------------------------------------------------------------------------------------------------------------------------------------------------------------------------------------------------------------------------------------------------------------------------------------------------------------------------------------------------------------------------------------------------|
| Journal:                      | <i>BMJ Open</i>                                                                                                                                                                                                                                                                                                                                                                                                                                                                                                                                                                                                                                                                  |
| Manuscript ID                 | bmjopen-2021-058177                                                                                                                                                                                                                                                                                                                                                                                                                                                                                                                                                                                                                                                              |
| Article Type:                 | Original research                                                                                                                                                                                                                                                                                                                                                                                                                                                                                                                                                                                                                                                                |
| Date Submitted by the Author: | 15-Oct-2021                                                                                                                                                                                                                                                                                                                                                                                                                                                                                                                                                                                                                                                                      |
| Complete List of Authors:     | Butler, Ailsa R; University of Oxford, Nuffield Department of Primary Care Health Sciences<br>Astbury, Nerys; University of Oxford, Nuffield Department of Primary Care Health Sciences<br>Goddard, Lucy; University of Oxford, Nuffield Department of Primary Care Health Sciences<br>Hajizadeh , Anisa ; University of Oxford, Nuffield Department of Primary Care Health Sciences<br>Seeber, Philippa; Patient and Public contributor<br>Crawley, Bruce; Patient and Public contributor<br>Aveyard, Paul; University of Oxford, Nuffield Department of Primary Care Health Sciences<br>Jebb, Susan; University of Oxford, Nuffield Department of Primary Care Health Sciences |
| Keywords:                     | GENERAL MEDICINE (see Internal Medicine), NUTRITION & DIETETICS, PREVENTIVE MEDICINE, PUBLIC HEALTH                                                                                                                                                                                                                                                                                                                                                                                                                                                                                                                                                                              |
|                               |                                                                                                                                                                                                                                                                                                                                                                                                                                                                                                                                                                                                                                                                                  |

SCHOLARONE™  
Manuscripts

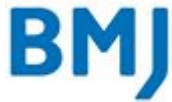

I, the Submitting Author has the right to grant and does grant on behalf of all authors of the Work (as defined in the below author licence), an exclusive licence and/or a non-exclusive licence for contributions from authors who are: i) UK Crown employees; ii) where BMJ has agreed a CC-BY licence shall apply, and/or iii) in accordance with the terms applicable for US Federal Government officers or employees acting as part of their official duties; on a worldwide, perpetual, irrevocable, royalty-free basis to BMJ Publishing Group Ltd ("BMJ") its licensees and where the relevant Journal is co-owned by BMJ to the co-owners of the Journal, to publish the Work in this journal and any other BMJ products and to exploit all rights, as set out in our [licence](#).

The Submitting Author accepts and understands that any supply made under these terms is made by BMJ to the Submitting Author unless you are acting as an employee on behalf of your employer or a postgraduate student of an affiliated institution which is paying any applicable article publishing charge ("APC") for Open Access articles. Where the Submitting Author wishes to make the Work available on an Open Access basis (and intends to pay the relevant APC), the terms of reuse of such Open Access shall be governed by a Creative Commons licence – details of these licences and which [Creative Commons](#) licence will apply to this Work are set out in our licence referred to above.

Other than as permitted in any relevant BMJ Author's Self Archiving Policies, I confirm this Work has not been accepted for publication elsewhere, is not being considered for publication elsewhere and does not duplicate material already published. I confirm all authors consent to publication of this Work and authorise the granting of this licence.

1  
2  
3 Setting the top 10 priorities for obesity and weight-related research (POWeR): a stakeholder priority  
4 setting process  
5  
6  
7  
8

9 Ailsa R Butler <sup>1\*</sup>

10  
11 Nerys M Astbury <sup>1\*</sup>

12  
13 Lucy Goddard <sup>1</sup>

14  
15 Anisa Hajizadeh <sup>1</sup>

16  
17 Philippa Seeber <sup>2</sup>

18  
19 Bruce Crawley <sup>2</sup>

20  
21 Paul Aveyard <sup>1†</sup>

22  
23 Susan A Jebb <sup>1†</sup>  
24  
25  
26  
27  
28  
29

30 <sup>1</sup> Nuffield Department of Primary Care Health Sciences, University of Oxford, Oxford, UK  
31  
32  
33  
34

35 <sup>2</sup> Public and patient representative  
36  
37

38 \*These authors contributed equally to this work  
39

40 †These authors contributed equally to this work  
41  
42  
43  
44

45 Corresponding author: nerys.astbury@phc.ox.ac.uk  
46

47 Nuffield Department of Primary Care Health Sciences, University of Oxford, Radcliffe Primary Care  
48 Building, Radcliffe Observatory Quarter, Woodstock Rd, Oxford OX2 6GG, UK.  
49  
50  
51  
52  
53  
54  
55  
56  
57  
58  
59  
60

## Abstract

**Objectives:** To identify and prioritise the most important unanswered questions for obesity and weight-related research.

**Methods:** We followed the James Lind Alliance methods, with members of the public, researchers, clinicians, and policy-makers jointly prioritising questions. The first stage identified uncertainties via an online survey that asked people for the obesity and weight-related questions that they would like answered. We assimilated these, checked which were already satisfactorily addressed by research and then invited stakeholders to rank the importance of remaining questions in an online survey. In the third stage, a workshop with independent facilitators, participants discussed the 30 highest ranked questions from survey 2 and jointly agreed the most important research questions.

**Results:** 278 people responded to survey 1 and submitted 941 questions. 198 questions were answered or out of scope and were excluded. In collaboration with two public contributors the remaining 743 unanswered questions were grouped and rephrased as 149 research questions. In stage 2, 405 respondents rated the importance of these questions. Thirty-eight people attended a workshop, including members of the public, people working for charities, researchers, clinicians and policy-makers, agreeing a list of the top 10 priority research questions from the initial 30. These questions covered: the role of the obesogenic environment; effective weight loss and weight loss maintenance strategies; prevention in children; effective prevention and treatment policies; the role of the food industry; access to and affordability of a healthy diet; the sociocultural factors associated with weight; the biology of appetite and food intake; and long-term health modelling.

**Conclusions:** A systematic and transparent method led to a clear consensus between stakeholders for 10 research priorities. Addressing these through targeted funding would bring the greatest benefits to the scientific understanding of obesity and weight regulation and thereby to population health.

### Strengths and limitations

- This is the first research priority setting exercise in the field of obesity research
- This exercise involved input from large number of participants from a broad a range of relevant stakeholder groups including patients and members of the public, researchers, policymakers, publishers, charities and politicians.
- The final list of priorities was drawn from a long-list in a workshop run by independent facilitators to minimise bias for certain questions or topic groups
- The high degree of consensus in the prioritised questions across all stages of the process meant that the priorities that emerged were probably not affected by the method we used to derive them.

## Introduction

Obesity is a major preventable cause of ill-health and is affecting an increasing number of children and adults globally (1, 2). No country has decreased the prevalence of obesity, despite the evidence, guidelines, and policies to tackle obesity in public health and health care systems (3, 4). Focused research is needed to address the gaps in the evidence, and inform practice and policy in obesity control. Presently, the research agenda is mainly driven by the interests and concerns of researchers, or research commissioners. A more transparent, systematic, and collaborative approach involving multiple stakeholders to identify research priorities and accelerate progress is required.

The James Lind Alliance (JLA) priority setting process brings patients, carers and clinicians together on an equal basis to define uncertainties, consider their importance, and thereby set research priorities (5, 6). The output should, and typically has, informed researchers and research funders about the key questions to address in research because it is based upon what matters most to people with lived experience of having a condition and those treating it (7). However, in the field of obesity and other questions related to excess weight, there is no obvious patient constituency as we are all at risk of developing overweight and the perspectives of policy-makers need to be included as well as clinicians. As a result, priority setting partnerships addressing public health topics have modified the JLA approach by incorporating wider viewpoints (8). Here the objective was to use this adapted JLA priority setting approach to identify and prioritise unanswered research questions in the field of obesity and weight-related research of the greatest importance to a range of stakeholders.

## Subjects and Methods

This priorities for obesity and weight-related research (POWeR) prioritisation process took place between December 2019 and December 2020. We were guided by the JLA priority setting process and by Viergever et al (9), but including members of the public, people with lived experience of

1  
2  
3 overweight, people who work for organisations and charities with an interest in health and obesity,  
4 funders, policy makers, health professionals, and academic researchers.  
5  
6  
7

8 The study was approved by the University of Oxford Medical Sciences Inter Divisional Research  
9 Ethics Committee (Ref: R6721/RE003).  
10  
11  
12

13 Consent was implied from the respondents to the surveys, whereas all participants in the online  
14 workshop provided informed consent prior to their participation.  
15  
16  
17

## 18 **Patient and public involvement**

19  
20 Patients and members of the public have been involved in all stages of the research reported in this  
21 manuscript, from the conception and design of the study, in the data collection and analysis and two  
22 public members (PS and BC) have been included as co-authors on this publication.  
23  
24  
25  
26  
27  
28

## 29 **Procedures**

### 30 **Stage 1: Identifying the uncertainties**

31  
32  
33 In an online survey, we asked respondents to submit up to four unanswered research questions that  
34 they felt should be prioritised in the field of obesity and weight-related research and to say why the  
35 question was important to them, which also provided context, reduced ambiguity and helped when  
36 we came to group similar questions. We were explicit that we were not covering questions related  
37 specifically to preventing or treating eating disorders, although the possible adverse effects of  
38 weight management programmes on, for example, eating disorders or other psychological  
39 outcomes, were in scope. We publicised the survey via a web link on the PWeR website and by  
40 directly emailing existing networks. The survey link was distributed by more than 40 organisations to  
41 their members and visitors to their webpages and via newsletters. Participation was incentivised  
42 through a prize draw.  
43  
44  
45  
46  
47  
48  
49  
50  
51  
52  
53  
54  
55  
56  
57  
58  
59  
60



1  
2  
3 The research team, working with members of the public, determined whether the questions  
4 submitted comprised a question that was answerable by empirical research, was already sufficiently  
5 answered by research, or was unanswered. We judged questions to be already answered if there  
6 was consistent published evidence, such as a reliable systematic review with little ongoing  
7 uncertainty, or based on guidelines with 'A' rating for strength of evidence. We aimed to group  
8 unanswered questions so that they captured the meaning of the original questions while addressing  
9 the broader topic. We re-expressed these in scientifically answerable question format. Our public  
10 contributors ensured that the grouped and rephrased questions faithfully represented the original  
11 questions and were understandable by the public.

## 24 **Stage 2. Prioritising the uncertainties**

27 In an online survey, we asked respondents to prioritise unanswered questions identified in the first  
28 stage. These were batched to reduce participant burden, with participants rating each question 1-10  
29 based on importance. We calculated the mean priority score for each RQ and ranked these by mean  
30 score.

## 37 **Stage 3: Identifying the top research priorities**

40 We invited a range of people representing members of the public (including but not limited to  
41 people with lived experience of being overweight), researchers, policy-makers, clinicians, and  
42 relevant research funders to attend a virtual workshop. Participants were asked to prepare by  
43 reading through the 30 top-ranked questions and also an extra 10 questions that more than 10  
44 people had submitted in stage 1 that ranked outside the top 30 in stage 2. Participants were told  
45 that they could incorporate questions from the list of 10 questions that were not in the top 30. The  
46 30 research questions were put into seven different random orders for the seven groups, with each  
47 group member receiving the same randomly ordered list. Letters were used rather than numbers to  
48 not influence people's choices. The structured workshop lasted three hours and was led by external  
49 facilitators with no specific knowledge of the topic. Each workshop participant worked in a group of  
50

1  
2  
3 four-six people, with a member of each 'constituency' in every group, introducing themselves and  
4 their background at the start of the session.  
5  
6

7 The workshop facilitators worked from a process plan so that the groups followed the same method  
8 for prioritising the list of research questions. The facilitators aimed to allow participants a fair and  
9 equal opportunity to speak. The questions could not be re-worded or merged by participants.  
10  
11  
12

13 Comments regarding wording and merging of questions were noted in post-hoc audit of the  
14 recordings. The virtual small groups aimed to mimic the round table set up. Prior to the workshop,  
15 participants were asked to prepare four questions from the 30 that they thought were top priority  
16 and four that were low priority. In the first stage of the workshop, participants justified these  
17 choices, thereby revealing their values used to prioritise to other group members, and discussion of  
18 these values was encouraged. Throughout the workshop the participants were asked to consider  
19 which of these questions would have the highest impact if taken forward as a research project. The  
20 facilitators assembled a higher priority and lower priority list from everyone's group list, without  
21 resolving differences in judgement at this stage.  
22  
23  
24  
25  
26  
27  
28  
29  
30  
31  
32  
33

34 The aim of the second session was for groups to achieve a ranked list of 14 questions. To do so,  
35 facilitators shared the list of questions that were neither considered high or low priority by anyone,  
36 moving those not ranked into one of three categories: priority, lower priority, not a priority. The  
37 facilitators used three colour coded screens to help with organising and prioritising the questions:  
38 green for priority, yellow for lower priority and red for questions that were considered not to be a  
39 priority. Discussion then focused on producing a joint list for the group of the highest rated  
40 priorities. In this final stage of group work, the facilitators encouraged participants to focus on the  
41 top two and then ranked the remaining questions that would have the biggest impact if the research  
42 had been conducted and the answers were known. In the final workshop stage, the whole group  
43 reconvened and facilitators shared each group's top two questions in a combined list. Then third and  
44 fourth ranked questions were added into the final list to produce a top 10.  
45  
46  
47  
48  
49  
50  
51  
52  
53  
54  
55  
56  
57  
58  
59  
60

## Results

### Stage 1: Identifying the uncertainties

941 original questions were submitted (Supplementary Table 1) by 278 respondents (Table 1). We excluded 198 (21.0%) questions prior to topic grouping that were either already answered 49 (5.2%) or not relevant 149 (15.8%) (Supplementary Table 2). Seven-hundred and forty-three questions were then grouped and rephrased to improve the precision and increase the breadth of scope, resulting in 149 research questions (Supplementary Table 3). The questions were from a wide range of topic areas (Figure 2).

### Stage 2: Prioritising the uncertainties

Four-hundred and five respondents prioritised the 149 questions, but batching and some partially completed surveys meant that each question was rated in importance by a mean of 115 people (standard deviation 9.7) (Supplementary Table 2).

### Stage 3: Identifying the research priorities

Sixty-four people were invited and 38 attended the workshop. One participant selected one question from the 10 questions considered important in survey 1 to add to the list of original 30 to be discussed (Supplemental Table 4). This question concerned the impact of the gut microbiome on weight regulation.

We used the top four ranked research questions from each group's final list of 14 questions to generate the questions that were most strongly prioritised. After removing duplicates this resulted in a list of 11 unique priority research questions (Table 2).

One group did not rank their top 10 questions during the workshop, but did batch their questions as high, medium and low-priority. All of this group's three high-priority research questions were included in the final list and two out of four of the medium-priority research questions were already included in the final list.

1  
2  
3 Eleven questions emerged from this process as top-ranked. However, on analysis of the recordings  
4  
5 of each group's discussion, it was clear that two prioritised questions were understood to be similar  
6  
7 in meaning and priority by different groups. We combined these two questions on the drivers of  
8  
9 food choice and appetite and how the brain controls food intake to produce one question. This left  
10  
11  
12 10 priority research questions (Table 2).  
13  
14

15 Five of the questions in this final top 10 list (Table 2) were in the top 10 questions from survey 1 and  
16  
17 seven in the top 20 from survey 1, using the number of people asking each question as an indicator  
18  
19 of ranking (Supplementary Table 3). Seven of the final questions were in the top 10 from survey 2  
20  
21 where the questions were ranked by mean score and eight in the top 20.  
22  
23  
24  
25  
26  
27  
28  
29  
30  
31  
32  
33  
34  
35  
36  
37  
38  
39  
40  
41  
42  
43  
44  
45  
46  
47  
48  
49  
50  
51  
52  
53  
54  
55  
56  
57  
58  
59  
60

## Discussion

Our priority setting exercise identified topics and research questions where there is a consensus that more information is needed to advance the field for the benefit of all involved. The top 10 research questions were consistently highly rated in the number of people putting forward the same question in stage 1, the ranking in stage 2, and collective agreement after group discussion in stage 3. At the workshop the top two research questions from all the groups resulted in seven research questions. The top 10 questions were wide-ranging and aimed at the individual, public health, and policy level.

The main strength of this project was the large number of participants from a broad range of stakeholder groups. We included members of the public, both people with and without lived experience of overweight throughout the process, and also charities concerned with obesity to influence the future priorities for research. The online workshop was led by independent facilitators with no particular research agenda and without input from the research team. Comments in the surveys and workshop reflected that participants felt strongly motivated to participate. The high degree of consensus in the prioritised questions across all stages of the process meant that the priorities that emerged were probably not affected by the method we used to derive them.

We deemed that 21% of all questions suggested at Stage 1 were already answered by empirical evidence. Although this judgement was necessarily subjective and may be considered a limitation by some, we based all our decisions on clear guidelines outlined above when producing the list of questions to take forward. When the participants in the workshop had the opportunity to discuss the questions which reached this stage, they did not comment that the proposed questions for prioritisation had already been answered. A further limitation is that in Stage 2, we asked participants to rate questions on a score of 1-10, but participants were disinclined to use the full range, many questions had means between six and eight, which meant that differences in the scoring were subtle. We attempted to correct for this by allowing workshop participants to bring in questions that they felt were more important than the top 30, but only one such question was

1  
2  
3 added. Nevertheless, a different sample of respondents may have rated the included questions  
4  
5 differently. However, within this list the top 10 emerged clearly with each group operating  
6  
7 independently, but coming to similar priority questions, suggesting that the top 10 are unlikely to  
8  
9 have been greatly affected by sampling variation. We planned to hold an in person workshop but  
10  
11 had to change this to online due to COVID-19 restrictions. Discussion may have been limited by the  
12  
13 virtual format, however the facilitators strived to achieve a balance of input from the participants in  
14  
15 the small group setting. A final limitation is that obesity is a worldwide problem calling for a global  
16  
17 research response. We aimed to reach only UK-based stakeholders. While we think that the process  
18  
19 has identified research questions that are also important outside of the UK, our process did not  
20  
21 specifically aim to take a global perspective and the priorities that may have emerged in countries  
22  
23 very different from the UK may have been different.  
24  
25  
26

27  
28 The main implication of this research is that the top 10 priorities for obesity and weight-related  
29  
30 research should be seriously considered by researchers and research funding bodies looking to  
31  
32 advance research in this field. Previous priority setting work seems to have resulted in research calls  
33  
34 based on or related to the priorities (10). Along with the top 10 questions, this project has identified  
35  
36 a further 139 unanswered research questions in this field which represents a resource for  
37  
38 researchers to call upon when considering gaps in the evidence.  
39  
40

## 41 42 **Conclusion**

43  
44 We have identified 10 priorities that covered: the role of the obesogenic environment; effective  
45  
46 weight loss and weight loss maintenance; prevention in children; effective prevention and treatment  
47  
48 policies; the role of the food industry; the access to and affordability of a healthy balanced diet; the  
49  
50 sociocultural factors associated with weight; the biology of appetite and food intake; and long-term  
51  
52 health modelling. Research funders may want to prioritise these questions when considering  
53  
54 research proposals or commissioning programmes of research to meet these challenges.  
55  
56  
57  
58  
59  
60

### Contributions

NMA, PA and SAJ conceived the concept. ARB, LG and NMA were responsible for collecting and collating data with guidance from PS and BC. ARB, LG AH and NMA produced an initial draft of the manuscript, PA, SAJ, PS and BC provided comments and edited the original draft. All authors reviewed and approved the final submitted version of the manuscript.

### Competing interests

NA, PA, and SAJ led an investigator-initiated study funded by Cambridge Weight Plan. PA has spoken at two symposia organised by the Royal College of General Practitioners that were funded by Novo Nordisk. None of these activities led to personal payment.

ARB, LG, AH, PS and BC have no interests to declare.

### Funding

The study was funded by the National Institute for Health Research (NIHR) Oxford and Thames Valley Applied Research Collaboration. NMA, PA and SAJ are supported by the NIHR Biomedical Research Centre Oxford, PA and SAJ are NIHR senior investigators.

The funders had no role in study design, data collection, data analysis, data interpretation, or writing of the report. The views are those expressed by the authors and not necessarily those of the NHS, NIHR, or Department of Health.

### Data sharing agreement

Requests can be made for the deidentified participant level data collected during this study from the Nuffield Department of Primary Care hosted Datasets Independent Scientific Committee (PrimDISC): [primdisc@phc.ox.ac.uk](mailto:primdisc@phc.ox.ac.uk) upon approval of a protocol, statistical analysis plan and the signing of a suitable data sharing agreement.

## Acknowledgements

We would like to thank Nicola Lindson and Jamie Hartmann Boyce for help and guidance and David Dyson, Gavin Hubbard, Alice Crouch and Dan Richard-Doran for support with the surveys and webpages, Michaela Noriek for help with public engagement, Goher Ayman for helpful advice We also want to thank everyone who worked on the POWER project including all the members of the health behaviours team who helped us with questions from survey 1. Elizabeth Morris, Carmen Piernas-Sanchez, Dimitrios Koutoukidis, Tanisha Spratt, Anne Ferrey, and Jenny Brooks. We would like to thank all the people who took the surveys and provided us with their original questions, everyone who ranked the questions and to all the workshop participants and the many organisations that distributed the surveys on our behalf. We are grateful to the workshop participants for giving us their time. We would like to thank Hopkins Van Mil for conducting the workshop.



**Table 1:** Demographic characteristics for respondents to survey 1 and survey 2

|                              | <b>Survey 1</b> | <b>Survey 2</b> |
|------------------------------|-----------------|-----------------|
|                              | N=278           | N=405           |
|                              | n (%)           | n (%)           |
| <b>Age</b>                   |                 |                 |
| <18                          | 0 (0)           | 1 (0.2)         |
| 18-29                        | 38 (13.7)       | 39 (9.6)        |
| 30-39                        | 47 (16.9)       | 54 (13.3)       |
| 40-49                        | 73 (26.3)       | 81 (20.0)       |
| 50-59                        | 69 (24.8)       | 79 (19.5)       |
| 60-69                        | 40 (14.4)       | 88 (21.2)       |
| ≥70                          | 8 (2.9)         | 59 (14.6)       |
| Prefer not to say            | 3 (1.1)         | 6 (1.5)         |
| <b>Gender</b>                |                 |                 |
| Female                       | 210 (75.5)      | 284 (70.1)      |
| Male                         | 61 (21.9)       | 115 (28.4)      |
| Non-binary                   | NA              | 2 (0.5)         |
| Other                        | 5 (1.8)         | 1 (0.2)         |
| I prefer not to say          | 2 (0.7)         | 3 (0.7)         |
| <b>Place of residence</b>    |                 |                 |
| England                      | 245(88.1)       | 361 (89.1)      |
| Scotland                     | 14 (5)          | 15 (3.7)        |
| Wales                        | 8 (2.9)         | 6 (1.5)         |
| N. Ireland                   | 4 (1.4)         | 4 (1.0)         |
| Not in UK                    | 4 (1.4)         | 13 (3.2)        |
| I prefer not to say          | 3 (1.1)         | 6 (1.5)         |
| <b>Ethnicity</b>             |                 |                 |
| White/ White British         | 236 (84.9)      | 187 (85.4)      |
| Mixed/ Multiple ethnic group | 11 (4)          | 5 (2.3)         |
| Asian/ Asian British         | 15 (5.4)        | 11 (5)          |
| Black/ Black British         | 4 (1.4)         | 5 (2.3)         |
| Other                        | 3 (1.1)         | 5 (2.3)         |
| I prefer not to say          | 9 (3.2)         | 6 (2.8)         |

**Education**

|                                   |            |            |
|-----------------------------------|------------|------------|
| School (pre-GCSE)                 | 4 (1.4)    | 3 (1.4)    |
| School (up to GCSE or equivalent) | 12 (4.3)   | 14 (6.4)   |
| School (A levels or equivalent)   | 9 (3.2)    | 11 (5.0)   |
| Higher education (e.g. college)   | 23 (8.3)   | 24 (11.0)  |
| Degree level or higher            | 223 (80.2) | 161 (73.5) |
| Other                             | 3 (1.1)    | 2 (0.91)   |
| I prefer not to say               | 4 (1.4)    | 4 (1.8)    |
| Total for education question      | 278        | 219*       |

**Lived experience of overweight**

|                     |            |            |
|---------------------|------------|------------|
| Yes                 | 103 (37.1) | 248 (61.2) |
| No                  | 164 (59.0) | 140 (34.6) |
| Other               | 11 (4.0)   | 11 (2.7)   |
| I prefer not to say | NA         | 6 (1.5)    |

**Stakeholder category \*\***

|                                                    |            |            |
|----------------------------------------------------|------------|------------|
| Healthcare professional                            | 22 (8.6)   | 36 (8.9)   |
| Public health professional                         | 17 (6.7)   | 26 (6.4)   |
| Researcher (general)                               | 32 (12.5)  | 33 (8.1)   |
| Researcher (weight/ obesity research)              | 49 (19.14) | 41 (10.1)  |
| Work in the charity sector                         | 14 (5.5)   | 18 (4.4)   |
| Work with a group representing people with obesity | 5 (2.0)    | 5 (1.2)    |
| Policymaker or Commissioner of healthcare services | 1 (0.4)    | 6 (1.5)    |
| Professional working outside of healthcare         | Not asked  | 12 (3.0)   |
| General interest (survey 1).                       | 103 (40.2) | 176 (43.5) |
| Responding in a personal capacity (survey 2)       |            |            |
| Other or I prefer not to say                       | 13 (5.1)   | 52 (12.8)  |

\* This question was not included for the first 186 respondents in survey 2

\*\*Stakeholder category: in survey 1 participants were able to describe themselves as belonging to more than one category. Categories selected presented. Lived experience was included in this section.

**Table 2:** Final Top 10 Priority Research Questions

|    |                                                                                          |
|----|------------------------------------------------------------------------------------------|
| 1  |                                                                                          |
| 2  |                                                                                          |
| 3  |                                                                                          |
| 4  |                                                                                          |
| 5  |                                                                                          |
| 6  | What are the most effective methods for weight maintenance following weight loss?        |
| 7  | What are the effective components of treatments/ programmes incorporating a              |
| 8  | behavioural element? How many and in what combination are most effective? What           |
| 9  | is the optimal duration of these programmes?                                             |
| 10 |                                                                                          |
| 11 |                                                                                          |
| 12 | What are the most effective methods for weight loss? What are the effective              |
| 13 | components of treatments/ programmes incorporating a behavioural element? How            |
| 14 | many and in what combination are most effective? What is the optimal duration of         |
| 15 | these programmes?                                                                        |
| 16 |                                                                                          |
| 17 |                                                                                          |
| 18 | What is the most effective and cost- effective mix of population/public health and       |
| 19 | individual interventions to tackle obesity?                                              |
| 20 |                                                                                          |
| 21 |                                                                                          |
| 22 | Do interventions that target the 'obesogenic environment', such as community             |
| 23 | interventions, urban planning, placement of fast-food outlets or workplace polices,      |
| 24 | affect population mean weight and do these effects differ by baseline weight status      |
| 25 | (underweight, healthy weight, overweight, obesity)? Which interventions are most         |
| 26 | effective at reaching low socio-economic groups?                                         |
| 27 |                                                                                          |
| 28 |                                                                                          |
| 29 | Do interventions (e.g. nutrition education and physical activity) in pre-school, primary |
| 30 | school and secondary school reduce children's risk of unhealthy weight gain and, if so,  |
| 31 | how do they act? Does the effect of such interventions differ by social and cultural     |
| 32 | groups?                                                                                  |
| 33 |                                                                                          |
| 34 |                                                                                          |
| 35 | What changes in supermarkets or the wider food industry are effective in promoting       |
| 36 | healthier diets? Does changing labelling and/or packaging on foods affect purchasing,    |
| 37 | consumption, and body weight?                                                            |
| 38 |                                                                                          |
| 39 |                                                                                          |
| 40 | What is the cost and affordability of a healthy balanced diet? How can we make           |
| 41 | healthier foods more affordable? How can we improve access to healthy diets for          |
| 42 | social and cultural groups, such as people in poverty, people in inner cities, or young  |
| 43 | and older people?                                                                        |
| 44 |                                                                                          |
| 45 |                                                                                          |
| 46 | How do demographic, social and cultural factors (e.g. age, socioeconomic status,         |
| 47 | lifestyle, environment, psychosocial functioning) affect weight status, weight gain and  |
| 48 | regional fat distribution? What are the mechanisms involved? Does the effectiveness      |
| 49 | of weight loss methods depend on social and cultural background and, if so, can the      |
| 50 | effects be made more equitable? Are weight loss methods tailored to people's             |
| 51 | background more effective for weight loss and weight maintenance than general            |
| 52 | methods?                                                                                 |
| 53 |                                                                                          |
| 54 |                                                                                          |
| 55 |                                                                                          |
| 56 | How accurate are existing models of health consequences of excess weight and the         |
| 57 | impact of weight loss? Which assumptions are critical in determining the long-term       |
| 58 | effectiveness and cost effectiveness of weight loss interventions? What do these         |
| 59 | models predict is the impact of weight loss interventions on health and disease          |
| 60 |                                                                                          |

1  
2  
3 incidence and the cost-effectiveness of such interventions? What is the impact of  
4 weight regain on the incidence of disease and cost-effectiveness of weight loss  
5 interventions?  
6  
7

8 What are the drivers of food choice, appetite, and intake and do variations in these  
9 drives explain who develops obesity and who does not? How does the brain control  
10 food intake and can we use these mechanism to aid weight loss? What are the brain  
11 responses (neural correlates) in response to food during weight loss and following  
12 weight regain?  
13  
14  
15  
16  
17  
18  
19  
20  
21  
22  
23  
24  
25  
26  
27  
28  
29  
30  
31  
32  
33  
34  
35  
36  
37  
38  
39  
40  
41  
42  
43  
44  
45  
46  
47  
48  
49  
50  
51  
52  
53  
54  
55  
56  
57  
58  
59  
60

For peer review only

1  
2  
3  
4  
5  
6  
7  
8  
9  
10  
11  
12  
13  
14  
15  
16  
17  
18  
19  
20  
21  
22  
23  
24  
25  
26  
27  
28  
29  
30  
31  
32  
33  
34  
35  
36  
37  
38  
39  
40  
41  
42  
43  
44  
45  
46  
47  
48  
49  
50  
51  
52  
53  
54  
55  
56  
57  
58  
59  
60

**Figure 1:** Flow of questions into the final top 10

**Figure 2:** Research questions by topic area

For peer review only

## References

1. NHS Digital. Health Survey for England 2019 2020 [updated 15 December 2020. Available from: <https://digital.nhs.uk/data-and-information/publications/statistical/health-survey-for-england>.
2. World Health Organization. Obesity and overweight 2020 [updated 1 April 2020. Available from: <https://www.who.int/news-room/fact-sheets/detail/obesity-and-overweight>.
3. Caballero B. The Global Epidemic of Obesity: An Overview. *Epidemiologic Reviews*. 2007;29(1):1-5.
4. Jaacks LM, Vandevijvere S, Pan A, McGowan CJ, Wallace C, Imamura F, et al. The obesity transition: stages of the global epidemic. *Lancet Diabetes Endocrinol*. 2019;7(3):231-40.
5. Alliance JL. The James Lind Alliance Guidebook 2021 [updated March 2021. Version 10:[Available from: <https://www.jla.nihr.ac.uk/jla-guidebook/downloads/JLA-Guidebook-Version-10-March-2021.pdf>.
6. Chalmers I, Atkinson P, Fenton M, Firkins L, Crowe S, Cowan K. Tackling treatment uncertainties together: the evolution of the James Lind Initiative, 2003-2013. *Journal of the Royal Society of Medicine*. 2013;106(12):482-91.
7. Nygaard A, Halvorsrud L, Linnerud S, Grov EK, Bergland A. The James Lind Alliance process approach: scoping review. *BMJ Open*. 2019;9(8):e027473.
8. Lindson N, Richards-Doran D, Heath L, Hartmann-Boyce J, team Ct. Setting research priorities in tobacco control: a stakeholder engagement project. *Addiction*. 2017.
9. Viergever RF, Olifson S, Ghaffar A, Terry RF. A checklist for health research priority setting: nine common themes of good practice. *Health Res Policy Syst*. 2010;8:36.
10. Nasser MC, S. What is research priority setting and what you need to do before starting? : Cochrane Research Collaboration; [Available from: <https://methods.cochrane.org/prioritysetting/resources>.

1  
2  
3  
4  
5  
6  
7  
8  
9  
10  
11  
12  
13  
14  
15  
16  
17  
18  
19  
20  
21  
22  
23  
24  
25  
26  
27  
28  
29  
30  
31  
32  
33  
34  
35  
36  
37  
38  
39  
40  
41  
42  
43  
44  
45  
46  
47  
48  
49  
50  
51  
52  
53  
54  
55  
56  
57  
58  
59  
60

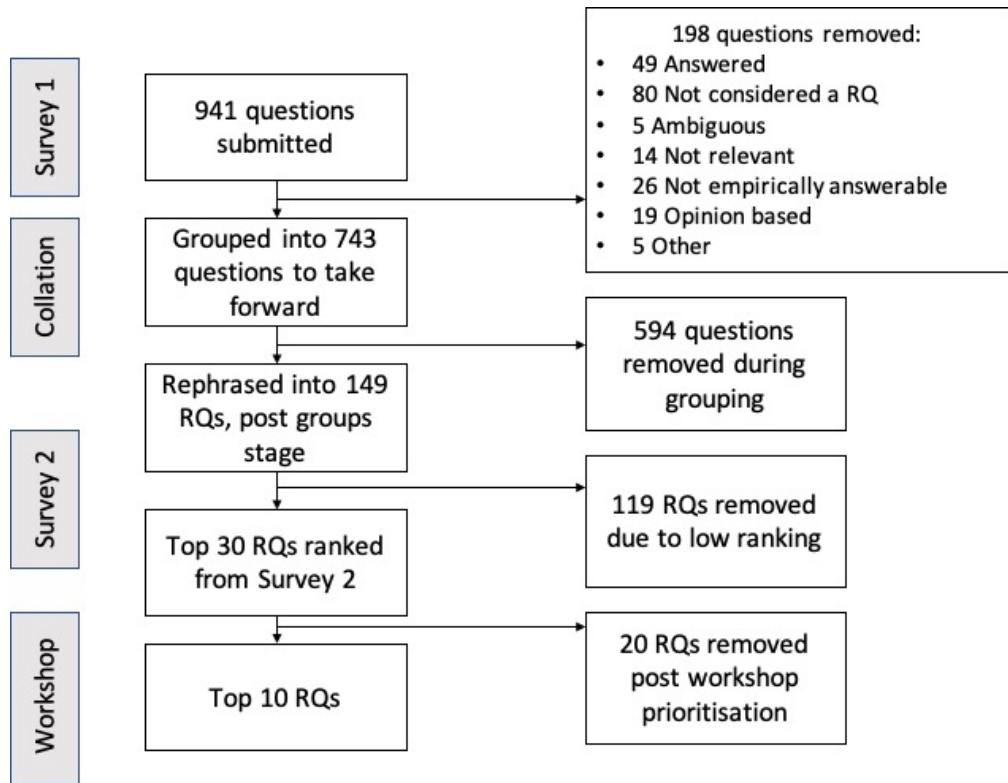

Figure 1

222x173mm (72 x 72 DPI)

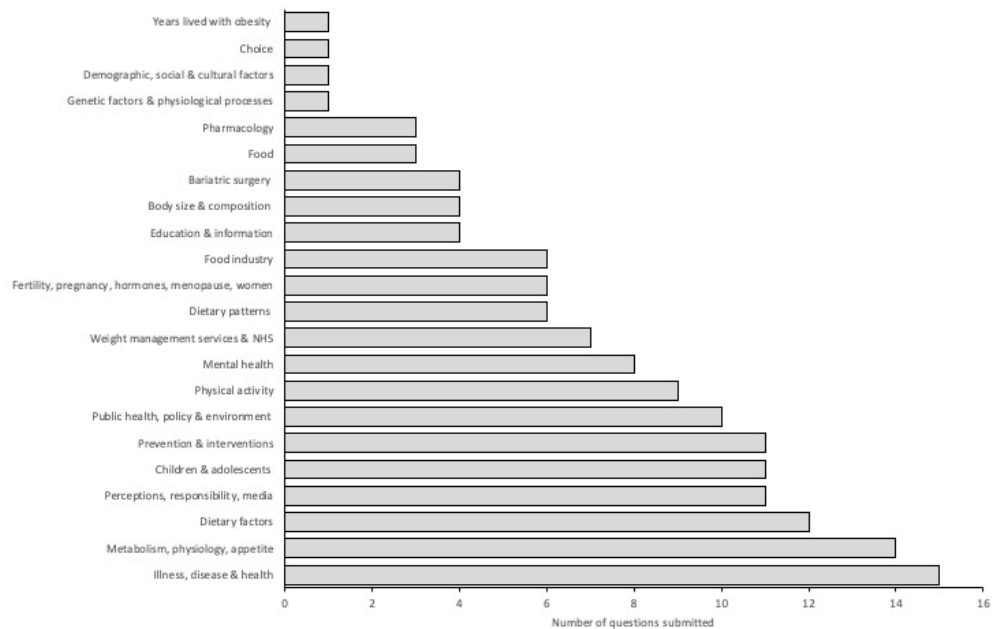

Figure 2

258x168mm (72 x 72 DPI)



**Supplementary Material**

1  
2  
3  
4  
5  
6  
7  
8  
9  
10  
11  
12  
13  
14  
15  
16  
17  
18  
19  
20  
21  
22  
23  
24  
25  
26  
27  
28  
29  
30  
31  
32  
33  
34  
35  
36  
37  
38  
39  
40  
41  
42  
43  
44  
45  
46

**Supplementary Table 1**

Full list of 941 original questions

**Supplementary Table 2**

Excluded questions

**Supplementary Table 3**

The re-phrased research questions

**Supplementary Table 4**

Questions debated at workshop

For peer review only

**Supplementary Table 1:** Full list of 941 original questions

| <b>Submitted questions</b>                                                                                                                                                                 |
|--------------------------------------------------------------------------------------------------------------------------------------------------------------------------------------------|
| What are the underlying genetic and physiological causes of obesity?                                                                                                                       |
| Further research on deepening understanding of factors which influence obesity on an individual basis (psychological, biological, genetic, etc.).                                          |
| Connection between underlying health issues/genes/metabolic rates that may cause Obesity.                                                                                                  |
| How much is obesity controlled by genetics, physiology etc. as opposed to a person's free will?                                                                                            |
| What are the underlying mechanisms for the journey to Obesity?                                                                                                                             |
| What factors are involved in weight related concerns - i.e. psychological/ psychosocial/ physical/ environmental? And which of these play a bigger part in obesity?                        |
| What are the social factors that contribute to obesity- and how can they be supported?                                                                                                     |
| What are the social* and environmental determinants of obesity/body-weight? *this includes how social policies influence incidence                                                         |
| How do we tackle the upstream determinants of diet and physical activity related to obesity?                                                                                               |
| Fully understanding the reasons for obesity and factors with achieving weight loss.                                                                                                        |
| What causes you to be obese or what do you think causes obesity?                                                                                                                           |
| What factors have influenced my weight gain?                                                                                                                                               |
| Why do we gain weight?                                                                                                                                                                     |
| What is the root cause of obesity and T2 diabetes?                                                                                                                                         |
| What other than food affects your weight gain/loss?                                                                                                                                        |
| What causes Obesity                                                                                                                                                                        |
| How do genetics affect obesity?                                                                                                                                                            |
| My family has hereditary obesity issues. Will that affect me certainly?                                                                                                                    |
| Why do people become obese? Is it genetic? Is it just over eating?                                                                                                                         |
| What is the effect of genetics on body weight and on what BMI percentile somebody will fall in?                                                                                            |
| Research into is obesity passed from one from parents?                                                                                                                                     |
| How can we combat the genetic component contributing to obesity- desire to eat/appetite, less ability to feel satisfied with food, preference for high calorie food?                       |
| Is obesity hereditary?                                                                                                                                                                     |
| Is weight gain hereditary?                                                                                                                                                                 |
| Is obesity hereditary?                                                                                                                                                                     |
| I would like to know if genetics play a part.                                                                                                                                              |
| Is obesity genetic? Can anything be done to prevent it?                                                                                                                                    |
| How true is the public belief that they are predisposed to be overweight - the broad sweep statement that genetic factors are to blame for a huge proportion of the weight issues observed |

|    |                                                                                                                                                                                                                                                                                   |
|----|-----------------------------------------------------------------------------------------------------------------------------------------------------------------------------------------------------------------------------------------------------------------------------------|
| 1  | Do genetics play a big part in obesity?                                                                                                                                                                                                                                           |
| 2  | Are there inherited factors to obesity?                                                                                                                                                                                                                                           |
| 3  | Is obesity genetic                                                                                                                                                                                                                                                                |
| 4  | How big a role does genetics play in familial obesity?                                                                                                                                                                                                                            |
| 5  | Why can some people eat what they want yet others put on weight when they do the same                                                                                                                                                                                             |
| 6  | What are the direct effects / mechanisms of poverty in relation to obesity                                                                                                                                                                                                        |
| 7  | What are the impacts of poverty and socioeconomic status on health; on body weight; and on health related stigma? What policy decisions could effectively address and reduce the health disparity and life expectancy disparity between richer and poorer communities in Britain? |
| 8  | What are the key drivers in SES disparities regarding overweight/obesity?                                                                                                                                                                                                         |
| 9  | What is the relationship between poverty and obesity?                                                                                                                                                                                                                             |
| 10 | Why are people from a lower socio-economic background more likely to have overweight or to be obese?                                                                                                                                                                              |
| 11 | Is there a link with peoples income and them being overweight                                                                                                                                                                                                                     |
| 12 | Why is it that some people can eat what they like n not put on weight yet I only have to look at food and the scales go up.                                                                                                                                                       |
| 13 | How true is the public belief that they are predisposed to be overweight - the broad sweep statement that genetic factors are to blame for a huge proportion of the weight issues observed                                                                                        |
| 14 | Do genetics play a big part in obesity?                                                                                                                                                                                                                                           |
| 15 | 30. Are there inherited factors to obesity?                                                                                                                                                                                                                                       |
| 16 | Is obesity genetic                                                                                                                                                                                                                                                                |
| 17 | How big a role does genetics play in familial obesity?                                                                                                                                                                                                                            |
| 18 | Why can some people eat what they want yet others put on weight when they do the same                                                                                                                                                                                             |
| 19 | What are the direct effects / mechanisms of poverty in relation to obesity                                                                                                                                                                                                        |
| 20 | What are the impacts of poverty and socioeconomic status on health; on body weight; and on health related stigma? What policy decisions could effectively address and reduce the health disparity and life expectancy disparity between richer and poorer communities in Britain? |
| 21 | What are the key drivers in SES disparities regarding overweight/obesity?                                                                                                                                                                                                         |
| 22 | What is the relationship between poverty and obesity?                                                                                                                                                                                                                             |
| 23 | Why are people from a lower socio-economic background more likely to have overweight or to be obese?                                                                                                                                                                              |
| 24 | Is there a link with peoples income and them being overweight                                                                                                                                                                                                                     |
| 25 | Why is it that some people can eat what they like n not put on weight yet I only have to look at food and the scales go up.                                                                                                                                                       |
| 26 | Why we falter/fail when we know weight loss is beneficial                                                                                                                                                                                                                         |
| 27 | Why do some people gain weight when others do not when consuming similar calories?                                                                                                                                                                                                |
| 28 | Why do some people get fat and others don't                                                                                                                                                                                                                                       |
| 29 | Why do some people gain weight and others don't on the same diet?                                                                                                                                                                                                                 |
| 30 |                                                                                                                                                                                                                                                                                   |
| 31 |                                                                                                                                                                                                                                                                                   |
| 32 |                                                                                                                                                                                                                                                                                   |
| 33 |                                                                                                                                                                                                                                                                                   |
| 34 |                                                                                                                                                                                                                                                                                   |
| 35 |                                                                                                                                                                                                                                                                                   |
| 36 |                                                                                                                                                                                                                                                                                   |
| 37 |                                                                                                                                                                                                                                                                                   |
| 38 |                                                                                                                                                                                                                                                                                   |
| 39 |                                                                                                                                                                                                                                                                                   |
| 40 |                                                                                                                                                                                                                                                                                   |
| 41 |                                                                                                                                                                                                                                                                                   |
| 42 |                                                                                                                                                                                                                                                                                   |
| 43 |                                                                                                                                                                                                                                                                                   |
| 44 |                                                                                                                                                                                                                                                                                   |
| 45 |                                                                                                                                                                                                                                                                                   |
| 46 |                                                                                                                                                                                                                                                                                   |

|    |                                                                                                                                                                       |
|----|-----------------------------------------------------------------------------------------------------------------------------------------------------------------------|
| 1  | Causes of obesity                                                                                                                                                     |
| 2  | Why do some patients manage to keep significant weight loss off and yet others don't? Is it because of where their set point is? Is it genetic/epigenetic, or         |
| 3  | environmental or is it behavioural/psychological differences.                                                                                                         |
| 4  | Who is most likely to recover from obesity, how and why?                                                                                                              |
| 5  | Why some people don't put on weight even eating unhealthy and excessive food?                                                                                         |
| 6  | Why people in one family on much the same diet vary so much in weight?                                                                                                |
| 7  | Why can't some people lose weight?                                                                                                                                    |
| 8  | are some people more prone to obesity, if so why                                                                                                                      |
| 9  | Which people with obesity will have a good response to behavioural weight management and which will need drugs or surgery to lose weight?                             |
| 10 | What subgroups of people with obesity respond differently to different behavioural interventions?                                                                     |
| 11 | Why is weight loss maintenance so hard? [I am a serial offender. Have lost 3stones+ at least 3 times in my life (one of those was 5st) and 2stones+ at least twice.]  |
| 12 | Why is it so hard to keep weight off after you lose it? [I've dieted many times and lost a lot of weight.]                                                            |
| 13 | Why do those empty fat cells shout 'feed me!' for at least 3 years after weight loss? Can anything be done to shut them up quicker??                                  |
| 14 | Is the rise in obesity in the general public genetic or a learned pattern of behaviour                                                                                |
| 15 | How much of an individual's weight is due to lifestyle factors, and how much is due to genetics?                                                                      |
| 16 | How much of an effect is genetics and how much is environmental                                                                                                       |
| 17 | How much of an impact does the environment have on an individual's weight (e.g. family circumstances, education, SES, availability and access to food), and is there  |
| 18 | anything that can be done to change this (government policies, retailer interventions, school food policies)                                                          |
| 19 | Why are certain ethnicities at a disproportionate risk?                                                                                                               |
| 20 | Can we develop predictors of outcomes that can aid personalising treatment approaches?                                                                                |
| 21 | What are predictors of weight loss success for a specific dietary or physical activity intervention?                                                                  |
| 22 | What leads of healthy and unhealthy weight gain in children?                                                                                                          |
| 23 | How can we make interventions close rather than widen gaps in deprived populations                                                                                    |
| 24 | How do I find information and solutions that apply specifically to me                                                                                                 |
| 25 | Can we assess the cause of people's weight gain by simple questionnaire in order to target the most appropriate intervention? For example, those who are overweight   |
| 26 | would need different action, depending on whether the main contributor is a health condition (physical or mental), lack of exercise, financial constraints, making it |
| 27 | difficult to buy healthy and filling food at low cost, busy lifestyle/lack of interest in cooking so that a lot of fast food is consumed, etc                         |
| 28 | How to study dietary preference in obesity management                                                                                                                 |
| 29 | What are the most effective ways to help people who are already obese manage their weight back to health, on an individual basis?                                     |
| 30 | Why can't I get support for weight issues tailor made to my life style?                                                                                               |
| 31 | Can we subtype obesity by cause and use this information to offer more targeted interventions to prevent or reduce obesity?                                           |
| 32 | With all the research into microbiome and the genetic responses to exercise is there a role for a more individualised approach to weight management?                  |

|    |                                                                                                                                                                                                                                                                                                                                                 |
|----|-------------------------------------------------------------------------------------------------------------------------------------------------------------------------------------------------------------------------------------------------------------------------------------------------------------------------------------------------|
| 1  | For those who are found to have a genetic predisposition to obesity what can medicine do to prevent this undesirable outcome                                                                                                                                                                                                                    |
| 2  | Why do some gain weight in certain places on the body and not others?                                                                                                                                                                                                                                                                           |
| 3  | Why does the fat go from where it goes from and which areas will lose first, etc?                                                                                                                                                                                                                                                               |
| 4  | What help would you like to see available, what help do you feel you need?                                                                                                                                                                                                                                                                      |
| 5  | What are the benefits versus harms/risks of weight loss using different weight loss methods or specific types/groups of people? [If you are genetically pre-disposed to obesity, are you better to live at a higher weight, if trying to reduce your weight leads to repeated weight cycling] (Second part of question used in another section) |
| 6  | Are different diets right for different people? Or is simply that the best diet is the one you stick to? If some work better for certain types of person, how do you pick the one that would be best for you?                                                                                                                                   |
| 7  | How can we personalise weight management?                                                                                                                                                                                                                                                                                                       |
| 8  | How can we increase metabolism rate in old age, in order to decrease the chance of gaining weight                                                                                                                                                                                                                                               |
| 9  | Does age have an effect on weight gain?                                                                                                                                                                                                                                                                                                         |
| 10 | What is leading cause?                                                                                                                                                                                                                                                                                                                          |
| 11 | Are there times in people's lives that are associated with more weight gain and how can they prevent this?                                                                                                                                                                                                                                      |
| 12 | As we age, do we need to consider consuming less food?                                                                                                                                                                                                                                                                                          |
| 13 | Why is it a struggle to lose the weight after middle age?                                                                                                                                                                                                                                                                                       |
| 14 | When did the individual become obese                                                                                                                                                                                                                                                                                                            |
| 15 | How is your appetite                                                                                                                                                                                                                                                                                                                            |
| 16 | At what age does excess weight begin to adversely affect health?                                                                                                                                                                                                                                                                                |
| 17 | Does the age at which people become overweight influence person's ability to lose weight later in life?                                                                                                                                                                                                                                         |
| 18 | How long should an effective weight management intervention be to provide both weight loss and weight maintenance?                                                                                                                                                                                                                              |
| 19 | What is the lowest level of intervention needed for a response?                                                                                                                                                                                                                                                                                 |
| 20 | How can we better understand the effective components of behaviour change interventions                                                                                                                                                                                                                                                         |
| 21 | Is it not what you do but how many different things you do? I.e. the impact of whole systems...                                                                                                                                                                                                                                                 |
| 22 | What has worked for you in the past and why you could not maintain your progression?                                                                                                                                                                                                                                                            |
| 23 | What are your long term goals? Where would you like to be in 5 years' time?                                                                                                                                                                                                                                                                     |
| 24 | Have you ever tried to lose weight before? How many times? And what was the outcome? - past experiences will help to find better solutions/option for a particular person                                                                                                                                                                       |
| 25 | How can we maintain healthy behaviour patterns in relation to eating and exercising?                                                                                                                                                                                                                                                            |
| 26 | How can I maintain a healthy weight and lifestyle?                                                                                                                                                                                                                                                                                              |
| 27 | What characteristics of weight loss interventions are likely to lead to LONG-TERM MAINTENANCE of weight loss?                                                                                                                                                                                                                                   |
| 28 | What are the evidence based interventions to maintain weight loss.                                                                                                                                                                                                                                                                              |
| 29 | What's the best strategy to keep the weight off, once lost?                                                                                                                                                                                                                                                                                     |

|    |                                                                                                                                         |
|----|-----------------------------------------------------------------------------------------------------------------------------------------|
| 1  | What is the most successful strategy to prevent weight regain?                                                                          |
| 2  | Is there any method of weight loss that is reliable in the long term?                                                                   |
| 3  | Once I lost some weight how avoid putting on again?                                                                                     |
| 4  | How to sustain weight loss or avoid increasing weight gain when obese if?                                                               |
| 5  | What are some of the most successful interventions in getting people to lose weight, and keep it off?                                   |
| 6  | How to maintain the weight loss?                                                                                                        |
| 7  | How can we ensure weight loss is sustained in the long term?                                                                            |
| 8  | What is the best way to maintain weight loss                                                                                            |
| 9  | What is the best/most effective way of losing weight and keeping it off long-term?                                                      |
| 10 | How to achieve sustained weight loss                                                                                                    |
| 11 | 23. maintaining weight lost                                                                                                             |
| 12 | What are the best regimes for long term weight management                                                                               |
| 13 | How to prevent weight gain                                                                                                              |
| 14 | Having lost weight do you find it creeps back on and maybe even goes up?                                                                |
| 15 | Why do so many people who lose weight regain the weight they lost?                                                                      |
| 16 | Research into keeping the weight off, once it has been lost as lots of people manage to lose weight and then put it on again.           |
| 17 | Why do we slip back into destructive eating patterns so quickly?                                                                        |
| 18 | What is the optimal dose of treatment contact required to prevent weight regain?                                                        |
| 19 | How can we maintain the modest weight loss achieved by lifestyle intervention or moderate weight loss achieved by VLED on the long run? |
| 20 | How can we apply a whole systems approach to weight loss maintenance?                                                                   |
| 21 | Is there enough focus on transitioning from weight reduction to the maintenance of healthy weight?                                      |
| 22 | Is weight maintenance feasible for any or many pts in weight loss programmes, and is this vital for health improvements                 |
| 23 | What is the best way to keep weight off in middle age?                                                                                  |
| 24 | What impact does it have on long term weight loss if the whole family is considered and not just the obese person in isolation          |
| 25 | Identifying how much support is needed for weight maintenance                                                                           |
| 26 | What creates success in weight loss? The dietary change/ choice or the long term support?                                               |
| 27 | Research on services and messaging that focuses on behaviour change rather than weight loss                                             |
| 28 | Which dietary strategies produce the most sustainable weight loss?                                                                      |
| 29 | Why are weight loss programmes (weight watchers and slimming world) not effective in the long term?                                     |
| 30 | Do we know which approaches to weight loss actually work?                                                                               |
| 31 | Effective weight loss                                                                                                                   |
| 32 |                                                                                                                                         |
| 33 |                                                                                                                                         |
| 34 |                                                                                                                                         |
| 35 |                                                                                                                                         |
| 36 |                                                                                                                                         |
| 37 |                                                                                                                                         |
| 38 |                                                                                                                                         |
| 39 |                                                                                                                                         |
| 40 |                                                                                                                                         |
| 41 |                                                                                                                                         |
| 42 |                                                                                                                                         |
| 43 |                                                                                                                                         |
| 44 |                                                                                                                                         |
| 45 |                                                                                                                                         |
| 46 |                                                                                                                                         |

|    |                                                                                                                                                                       |
|----|-----------------------------------------------------------------------------------------------------------------------------------------------------------------------|
| 1  | What effective interventions could we deliver in primary care to help people with overweight and obesity                                                              |
| 2  | What Public Health programmes or interventions actually influence people to eat a healthy diet?                                                                       |
| 3  | How do people lose weight easily?                                                                                                                                     |
| 4  | How can I shift weight easily?                                                                                                                                        |
| 5  | What works to reduce weight?                                                                                                                                          |
| 6  | How to lose weight                                                                                                                                                    |
| 7  | Aside from restriction of calories and using more energy what else can I do to reduce my weight                                                                       |
| 8  | For those who are already living with overweight/obesity, what are the most efficacious, cost-effective strategies and how can these be implemented?                  |
| 9  | How I can make changes in my diet so I can lose some weight?                                                                                                          |
| 10 | Which weight loss methods are the most effective and long lasting? E.g. calorie counting, exercise, group support, portion control, food group's exclusion etc.       |
| 11 | Has the person dieted, was this successful                                                                                                                            |
| 12 | Effective weight loss intervention development                                                                                                                        |
| 13 | How effective current treatments for obesity is m, are there any clinical treatments                                                                                  |
| 14 | How can people lose weight?                                                                                                                                           |
| 15 | What is the most successful diet                                                                                                                                      |
| 16 | What is an easy way to lose weight                                                                                                                                    |
| 17 | How do I lose weight?                                                                                                                                                 |
| 18 | What is the best and correct advice to give to patients                                                                                                               |
| 19 | Evidence based guidelines for weight loss                                                                                                                             |
| 20 | What actually is the best eating plan to follow it's a minefield out there so much advice on tv books etc. is there research that could prove the best eating plan to |
| 21 | reduce weight then maintain it healthily                                                                                                                              |
| 22 | A holistic approach to weight loss                                                                                                                                    |
| 23 | How can we help people change their lifestyles to maintain weight lost with very low energy diets?                                                                    |
| 24 | How effective is schema-focused therapy in weight management?                                                                                                         |
| 25 | How can we better engage people with weight loss services?                                                                                                            |
| 26 | What could services do to encourage you to help yourself?                                                                                                             |
| 27 | What can be done to help people stick to new healthy eating behaviours?                                                                                               |
| 28 | Why is weight loss maintenance so hard?                                                                                                                               |
| 29 | Why is it so hard to keep weight off after you lose it?                                                                                                               |
| 30 | What are the best tools/technologies to help people adhere to long-term dietary and physical activity goals?                                                          |
| 31 | How do we get people to eat healthily and reduce obesity?                                                                                                             |
| 32 | How to make lifestyle changes                                                                                                                                         |

|    |                                                                                                                                                                       |
|----|-----------------------------------------------------------------------------------------------------------------------------------------------------------------------|
| 1  | What is a healthy lifestyle?                                                                                                                                          |
| 2  | How to engage people (children and adults) who are overweight in weight management programmes                                                                         |
| 3  | What are the barriers that prevent people from losing weight?                                                                                                         |
| 4  | What stops you from losing weight?                                                                                                                                    |
| 5  | What do people with obesity think is their biggest barrier to losing weight and keeping it off?                                                                       |
| 6  | What are the real barriers in engaging the population in healthy eating for their children?                                                                           |
| 7  | What are the cultural barriers to different BAME communities exercising in green spaces and what interventions can overcome these barriers.                           |
| 8  | How can we best help and support you?                                                                                                                                 |
| 9  | What support do you need?                                                                                                                                             |
| 10 | Repeated failure                                                                                                                                                      |
| 11 | Would you like to be a healthier weight?                                                                                                                              |
| 12 | What would you like to weigh/achieve                                                                                                                                  |
| 13 | Do you want to lose weight?                                                                                                                                           |
| 14 | 'Willpower': Why can some people control what they eat whilst others cannot?                                                                                          |
| 15 | What is the motivation for your desire to lose weight?                                                                                                                |
| 16 | Feel hopeless that can't get going                                                                                                                                    |
| 17 | How to manage calories. Mind set to lose weight. Healthy eating. Why do we fail?                                                                                      |
| 18 | Why we falter/fail when we know weight loss is beneficial                                                                                                             |
| 19 | What Weight management lifestyle Interventions can be effectively delivered in a primary care setting? Is there a place for group consultations in weight management? |
| 20 | Are slimming clubs effective                                                                                                                                          |
| 21 | Would the client feel more supported if they had a weight loss buddy, who may also need to lose weight?                                                               |
| 22 | To make sure they have a social network so that they can mix with others doing arts and crafts etc.                                                                   |
| 23 | Do you have good friends you can rely on, who would encourage you to lose weight, and motivate you? - It's good to have someone who supports you.                     |
| 24 | Is there a place for group consultations in weight management?                                                                                                        |
| 25 | Is there a space for peer-support groups within weight management?                                                                                                    |
| 26 | How effective are mobile applications in promoting weight loss among obese patients?                                                                                  |
| 27 | Can digital interventions improve both wt loss and weight management, and if so which ones                                                                            |
| 28 | Can apps help you lose weight?                                                                                                                                        |
| 29 | Do group activities help weight loss more?                                                                                                                            |
| 30 | How best to manage weight loss in housebound patients?                                                                                                                |
| 31 | Does access to low-cost exercise equipment at home help with weight loss (i.e. mini pedals, which won't take up much room)                                            |



|    |                                                                                                                                                                          |
|----|--------------------------------------------------------------------------------------------------------------------------------------------------------------------------|
| 1  | Exercise [how to exercise without having to go to a gym.]                                                                                                                |
| 2  | What is the benefit of a weight-neutral approach to health                                                                                                               |
| 3  | Consider shift towards behaviour rather than weight; review and include evidence that weight isn't directly related to poor outcomes - genetics & sociodemographic       |
| 4  | variables have a much stronger influence; effect of weight stigma on health; adopt health at every size approach.                                                        |
| 5  | How can weight-inclusive approaches to health be used to reduce stigma and better support improved overall health?                                                       |
| 6  | This could make the client feel more confident and it could prevent them from being lonely, which could affect their eating habits.                                      |
| 7  | To constantly be alone at home is not healthy and can lead to bad eating habits and mental health issues.                                                                |
| 8  | Group consultations are becoming more popular and we would benefit from understanding where they have the most impact                                                    |
| 9  | Peer support has proven effective in other health conditions (e.g. stroke, diabetes, chronic pain etc.) in helping individual's access necessary support from those with |
| 10 | similar lived experience. Ideas can be shared of how to cope with challenges that present with being overweight, and can reduce feelings of isolation (i.e. I'm not      |
| 11 | alone in struggling with my weight)                                                                                                                                      |
| 12 | What role does social prescribing play in obesity?                                                                                                                       |
| 13 | Is there any evidence that social prescribing can benefit healthy eating?                                                                                                |
| 14 | Do BMI bands help to motivate the public to lose weight?                                                                                                                 |
| 15 | Who do people think should be responsible for their health? [Because it's important that health behaviour change messages come from credible/ acceptable sources]        |
| 16 | Do you have to be thin (healthy weight) to discuss and treat excessive weight?                                                                                           |
| 17 | What can the food industry do to help the nation's palate develop healthier preferences?                                                                                 |
| 18 | Would subsidising fresh food lead to increased consumption and improved health? Would cost be offset by savings to NHS?                                                  |
| 19 | Research into Public health subsidised exercise and activity classes and their effects on rates of obesity in the respective communities?                                |
| 20 | If local authority swimming pools and gyms were subsidised or free would the cost be offset by improved health and lowered cost the NHS?                                 |
| 21 | Which health policies that target the obesogenic environment (e.g. town planning, advertising restrictions, taxation) are most effective at reaching low socio-economic  |
| 22 | groups?                                                                                                                                                                  |
| 23 | What can behavioural insights tell us about working to change the obesogenic environment? How can this complement the whole systems approach to obesity work?            |
| 24 | How to change the environment so to make it less obesogenic e.g. fast food shops                                                                                         |
| 25 | How can we effectively change the obesogenic environment to promote adoption and maintenance of healthier diet and physical activity habits?                             |
| 26 | What specific strategies help to avoid temptation in an environment filled with food cues?                                                                               |
| 27 | How does the obesogenic environment directly affect obesity rates?                                                                                                       |
| 28 | Why, despite public awareness are there so many fast food outlets?                                                                                                       |
| 29 | How can we change the behaviour of policy makers / town planners to restructure the obesogenic environment?                                                              |
| 30 | What is the impact of policies looking to change the built environment?                                                                                                  |
| 31 | Implementation of healthy planning/ obesogenic environment                                                                                                               |
| 32 | How can we change the environment to help prevent obesity? Should we implement more taxes, reduce advertising or do more?                                                |
| 33 |                                                                                                                                                                          |
| 34 |                                                                                                                                                                          |
| 35 |                                                                                                                                                                          |
| 36 |                                                                                                                                                                          |
| 37 |                                                                                                                                                                          |
| 38 |                                                                                                                                                                          |
| 39 |                                                                                                                                                                          |
| 40 |                                                                                                                                                                          |
| 41 |                                                                                                                                                                          |
| 42 |                                                                                                                                                                          |
| 43 |                                                                                                                                                                          |
| 44 |                                                                                                                                                                          |
| 45 |                                                                                                                                                                          |
| 46 |                                                                                                                                                                          |

|    |                                                                                                                                                                                                                                                                                    |
|----|------------------------------------------------------------------------------------------------------------------------------------------------------------------------------------------------------------------------------------------------------------------------------------|
| 1  | How can we make environments less obesogenic?                                                                                                                                                                                                                                      |
| 2  | Governance of food environment- thinking in systems                                                                                                                                                                                                                                |
| 3  | How can we adapt our environment to encourage less sedentary behaviour (through town planning/workplace policies/nudges etc.)?                                                                                                                                                     |
| 4  | Whether is it possible to navigate the obesogenic environment without gaining weight or whether the obesogenic environment is has to change?                                                                                                                                       |
| 5  | What do we need to change in the environment to support people to have a health weight?                                                                                                                                                                                            |
| 6  | Which health policies that target the obesogenic environment (e.g. town planning, advertising restrictions, taxation) are most effective at reaching low socio-economic groups?                                                                                                    |
| 7  | The obesogenic environment is a fairly new development, so why can't it be designed away again?                                                                                                                                                                                    |
| 8  | The impact on neighbourhoods built to promote active lifestyles on obesity and prevention of obesity.                                                                                                                                                                              |
| 9  | How can better urban planning actually be implemented?                                                                                                                                                                                                                             |
| 10 | Modification of food environment                                                                                                                                                                                                                                                   |
| 11 | What makes people remain a healthy weight in an obesogenic environment?                                                                                                                                                                                                            |
| 12 | How do we best prevent obesity in the first place; and how do we best lose weight over time if we have a few extra pounds?                                                                                                                                                         |
| 13 | How obesity can be *prevented*, rather than cured.                                                                                                                                                                                                                                 |
| 14 | How to take sufficient, & sustainable preventative measures soon enough in a life to combat obesity                                                                                                                                                                                |
| 15 | How to treat obesity and prevent it                                                                                                                                                                                                                                                |
| 16 | What is best way to prevent, is it to never be obese or to fight it later?                                                                                                                                                                                                         |
| 17 | Have any governments taken effective steps to tackle obesity, and could we learn from this?                                                                                                                                                                                        |
| 18 | What kind of public health promotion programmes and campaigns should governments be promoting/investing in?                                                                                                                                                                        |
| 19 | More research into how other countries are managing to avoid having the same proportions of their population as overweight or obese.                                                                                                                                               |
| 20 | What policy interventions can influence either obesity or other health outcomes related to obesity?                                                                                                                                                                                |
| 21 | What kind of public policy changes are effective at helping people lose weight (e.g., traffic light labelling, calorie counts)?                                                                                                                                                    |
| 22 | What societal changes could be implemented easily / cheaply / at a local level - that would help reduce obesity                                                                                                                                                                    |
| 23 | What community intervention strategies are successful for promoting weight loss in obese populations?                                                                                                                                                                              |
| 24 | Do we have good evidence for community-based weight loss and management interventions?                                                                                                                                                                                             |
| 25 | What are the effects of population level or systems level interventions?                                                                                                                                                                                                           |
| 26 | Is a wider public health rather than a targeted approach better of best used at the same time                                                                                                                                                                                      |
| 27 | How can we apply obesity prevention strategies at the population level?                                                                                                                                                                                                            |
| 28 | What has research shown about if it is easier / cheaper to prevent obesity related diseases?                                                                                                                                                                                       |
| 29 | Early screening and intervention. Let's get creative, appropriate, and effective - what works?                                                                                                                                                                                     |
| 30 | Why doesn't medical intervention via paid subscription to a club or group start at 15% overweight, when it's still possible to see results and do exercise instead of waiting until 100%+ overweight, when exercise is impossible and loss so slow you ever see any end to dieting |
| 31 |                                                                                                                                                                                                                                                                                    |
| 32 |                                                                                                                                                                                                                                                                                    |
| 33 |                                                                                                                                                                                                                                                                                    |
| 34 |                                                                                                                                                                                                                                                                                    |
| 35 |                                                                                                                                                                                                                                                                                    |
| 36 |                                                                                                                                                                                                                                                                                    |
| 37 |                                                                                                                                                                                                                                                                                    |
| 38 |                                                                                                                                                                                                                                                                                    |
| 39 |                                                                                                                                                                                                                                                                                    |
| 40 |                                                                                                                                                                                                                                                                                    |
| 41 |                                                                                                                                                                                                                                                                                    |
| 42 |                                                                                                                                                                                                                                                                                    |
| 43 |                                                                                                                                                                                                                                                                                    |
| 44 |                                                                                                                                                                                                                                                                                    |
| 45 |                                                                                                                                                                                                                                                                                    |
| 46 |                                                                                                                                                                                                                                                                                    |

|    |                                                                                                                                                                    |
|----|--------------------------------------------------------------------------------------------------------------------------------------------------------------------|
| 1  | What is the impact of the development and implementation of national food policies to support healthy weight in public settings such as schools and hospitals?     |
| 2  | What influence does fast food advertising have on children obesity?                                                                                                |
| 3  | Should the government put heavy taxes on unhealthy processed food/drinks and heavily subsidise healthy organic whole food/drinks?                                  |
| 4  | What is the impact of increasing sugar tax or other legislation to encourage healthier eating                                                                      |
| 5  | How important are things like the sugar tax and food labelling in the prevention of obesity?                                                                       |
| 6  | What is the widely held (including public) opinion on "fat taxing" or strict industry/commercial sanctions?                                                        |
| 7  | Should food and drinks manufacturers be given a "cap" for products (i.e. limited to so many calories, fat, sugar, etc?)                                            |
| 8  | Any research connected to people living with obesity who are serving long term imprisonments?                                                                      |
| 9  | How come side effects differ so much from person to person                                                                                                         |
| 10 | We know that bariatric surgery is currently the most effective treatment for people with severe obesity (e.g. BMI > 40), yet most people with severe obesity don't |
| 11 | choose this option even when it is available. Why? What options do people prefer?                                                                                  |
| 12 | What is the long term consequences of Bariatric Surgery exacerbate in those with an untreated Binge Eating Disorder?                                               |
| 13 | How does Bariatric Surgery impact on intimate relationships with patients post-surgery? Exploring gender differences?                                              |
| 14 | Do community health care practitioners know how to manage long-term post bariatric patients once discharged from acute care?                                       |
| 15 | Are patients who have had bariatric surgery receiving the recommended follow up in primary care?                                                                   |
| 16 | For individuals eligible for bariatric surgery, what aftercare support is provided and how long does this support last for?                                        |
| 17 | Should dietetic and psychological resources be invested in preoperative setting or in post-operative settings?                                                     |
| 18 | Statistics to weight gain after so many years                                                                                                                      |
| 19 | What are the energy requirements with and without CVD and/or weight resistance exercise post bariatric surgery?                                                    |
| 20 | Although I don't eat much feel my metabolism lowered with band and gain weight very easy                                                                           |
| 21 | What is the short and long term psychological impact of Bariatric Surgery?                                                                                         |
| 22 | How best to integrate exercise with commuting                                                                                                                      |
| 23 | Is active travel possible in both cities and rural areas?                                                                                                          |
| 24 | What impact does active commute really have on weight loss?                                                                                                        |
| 25 | How can we increase levels of physical activity for those working long hours where being sedentary is largely unavoidable?                                         |
| 26 | Should employers provide benefits for staff e.g. gym membership discounts, walk/cycle to work schemes? How could this be funded?                                   |
| 27 | What do people think about using standing desks at work? What would help motivate obese people to use a standing desk?                                             |
| 28 | Do employers have an obligation to actively promote healthy lifestyles within the workplace to help employees with diet and obesity? Would this have an impact on  |
| 29 | absence levels and improve employee performance and engagement.                                                                                                    |
| 30 | What more can employers do to help employees keep to a healthy weight?                                                                                             |
| 31 | How to fit exercise into your week                                                                                                                                 |
| 32 | How can I add some exercise to my life?                                                                                                                            |
| 33 |                                                                                                                                                                    |
| 34 |                                                                                                                                                                    |
| 35 |                                                                                                                                                                    |
| 36 |                                                                                                                                                                    |
| 37 |                                                                                                                                                                    |
| 38 |                                                                                                                                                                    |
| 39 |                                                                                                                                                                    |
| 40 |                                                                                                                                                                    |
| 41 |                                                                                                                                                                    |
| 42 |                                                                                                                                                                    |
| 43 |                                                                                                                                                                    |
| 44 |                                                                                                                                                                    |
| 45 |                                                                                                                                                                    |
| 46 |                                                                                                                                                                    |

|    |                                                                                                                                                                          |
|----|--------------------------------------------------------------------------------------------------------------------------------------------------------------------------|
| 1  | What is the obstacles for people that stop them getting some physical activity                                                                                           |
| 2  | Why do obese people feel it is not possible to exercise? How can we make this very acceptable and applauded?                                                             |
| 3  | What could be done to encourage obese people to increase their physical activity?                                                                                        |
| 4  | Populations could include parents for school active travel, or adults travelling to work.                                                                                |
| 5  | Whilst exercise causes us to produce endorphins our response to this varies from person to person, does having a lower response make us more susceptible to putting      |
| 6  | on weight and less likely to exercise?                                                                                                                                   |
| 7  | How does people's perceptions of air quality influence the likelihood of active travel?                                                                                  |
| 8  | Reduction in amount of activities                                                                                                                                        |
| 9  | Do you get out of puff (short of breath) when you walk?                                                                                                                  |
| 10 | The importance of fitness/physical activity when overweight/obese                                                                                                        |
| 11 | How can I better judge how many calories are burned by exercising?                                                                                                       |
| 12 | How can we develop objective tracking of energy balance                                                                                                                  |
| 13 | Is there a phone app that can be used to photograph a person's plate / food that would provide information on the calorific and nutritional value of the food and        |
| 14 | inform the person when they had reached their daily recommended allowance. This allowance would be tailored to the individual in terms of age, sex, levels of activity   |
| 15 | and other health information.                                                                                                                                            |
| 16 | Is there such a thing as an app which can accurately tell user what the calories are in a meal/drink, perhaps by using camera on phone and specific bowl/plate sizes (it |
| 17 | can be very complicated if you have to input calories all the time)                                                                                                      |
| 18 | Many interventions focus on changing people's diets, but it is hard to measure what has changed without using long & detailed questionnaires or apps that often          |
| 19 | result in inaccurate results. Is there a way to measure diet quality that can easily be applied in clinical / research settings?                                         |
| 20 | Do you lose more weight if you exercise or not?                                                                                                                          |
| 21 | Why do people think moderate amounts of exercise creates weight loss                                                                                                     |
| 22 | Is there enough emphasis on combining healthy eating and exercise and a way of combating obesity rather than purely dieting?                                             |
| 23 | How important is exercise in weight loss?                                                                                                                                |
| 24 | Is calorie controlling best way to control weight?                                                                                                                       |
| 25 | What is the best combination of dietary and physical activity strategies to maximize weight outcomes and appetite?                                                       |
| 26 | What is the best form of exercise to lose weight?                                                                                                                        |
| 27 | what is the most efficient exercise to lose weight                                                                                                                       |
| 28 | Most effective exercise                                                                                                                                                  |
| 29 | What types of sport contribute to a reduction in obesity for those that don't regularly play or do sports.                                                               |
| 30 | What kind of exercise do I need to do and how often to lose weight?                                                                                                      |
| 31 | Best forms of physical activity for weight loss/maintenance                                                                                                              |
| 32 |                                                                                                                                                                          |
| 33 |                                                                                                                                                                          |
| 34 |                                                                                                                                                                          |
| 35 |                                                                                                                                                                          |
| 36 |                                                                                                                                                                          |
| 37 |                                                                                                                                                                          |
| 38 |                                                                                                                                                                          |
| 39 |                                                                                                                                                                          |
| 40 |                                                                                                                                                                          |
| 41 |                                                                                                                                                                          |
| 42 |                                                                                                                                                                          |
| 43 |                                                                                                                                                                          |
| 44 |                                                                                                                                                                          |
| 45 |                                                                                                                                                                          |
| 46 |                                                                                                                                                                          |

|    |                                                                                                                                                                                                                                                                                                                                        |
|----|----------------------------------------------------------------------------------------------------------------------------------------------------------------------------------------------------------------------------------------------------------------------------------------------------------------------------------------|
| 1  | What are the health risks of being overweight/obese but physically active? Does being physically active despite being overweight reduce disease risks of being overweight?                                                                                                                                                             |
| 2  |                                                                                                                                                                                                                                                                                                                                        |
| 3  | To what degree is higher weight due to more muscle OK vs higher weight due to more fat? Basically is it alright to be slightly overweight if it's 'all muscle'?                                                                                                                                                                        |
| 4  | How can we widen access to effective weight loss support services for people affected by obesity?                                                                                                                                                                                                                                      |
| 5  |                                                                                                                                                                                                                                                                                                                                        |
| 6  | Does regional variation in provision of obesity services have a positive or negative correlate with regional prevalence of - and trajectories in - obesity                                                                                                                                                                             |
| 7  | How can obesity strategies be applied in practice?                                                                                                                                                                                                                                                                                     |
| 8  | What are the best early interventions that can be administered in primary care                                                                                                                                                                                                                                                         |
| 9  |                                                                                                                                                                                                                                                                                                                                        |
| 10 | Why can I get a gastric bypass on the NHS, but not Slimming World?                                                                                                                                                                                                                                                                     |
| 11 | Do integrated lifestyle services offer equivalent outcomes and/or better value than individual programmes?                                                                                                                                                                                                                             |
| 12 | Should patients have direct access to Tier 3 services? Esp. those of high BMI                                                                                                                                                                                                                                                          |
| 13 | What is the effect of tier 3 weight management services on people with obesity?                                                                                                                                                                                                                                                        |
| 14 |                                                                                                                                                                                                                                                                                                                                        |
| 15 | How effective and cost-effective are level/tier 3 and 2 weight management services.                                                                                                                                                                                                                                                    |
| 16 | Are Tier 3 treatments better than Tier 2                                                                                                                                                                                                                                                                                               |
| 17 |                                                                                                                                                                                                                                                                                                                                        |
| 18 | Joined up services... we need research that creates a pathway from Tiers 1 - 4                                                                                                                                                                                                                                                         |
| 19 | Intervention Cost v Future Cost Saving for the NHS - To evaluate what financial (if any) benefits would be achieved for every £1 spent by the NHS on the interventions available to improve the health of people living with obesity.                                                                                                  |
| 20 |                                                                                                                                                                                                                                                                                                                                        |
| 21 | Do economic evaluations based on modelling of cohorts over-estimate the benefits of weight loss? [Does weight loss return people to the same risk of those who never gained weight in the first place?] <i>Second part of question used in another section</i>                                                                         |
| 22 |                                                                                                                                                                                                                                                                                                                                        |
| 23 |                                                                                                                                                                                                                                                                                                                                        |
| 24 | How can we develop better economic modelling for the impact of obesity and the benefits of its variety of treatments?                                                                                                                                                                                                                  |
| 25 | Does increase in public health funding reduce obesity                                                                                                                                                                                                                                                                                  |
| 26 |                                                                                                                                                                                                                                                                                                                                        |
| 27 | What is the effectiveness and cost-effectiveness in terms of preventing CV events (and diabetes and other consequences of obesity) for different weight loss / weight regain profiles?                                                                                                                                                 |
| 28 |                                                                                                                                                                                                                                                                                                                                        |
| 29 | We know that many people who lose weight will regain it. Are there long-term health benefits from short-term weight loss, and if so, is there a minimum amount of weight loss / duration that has clear benefits?                                                                                                                      |
| 30 |                                                                                                                                                                                                                                                                                                                                        |
| 31 |                                                                                                                                                                                                                                                                                                                                        |
| 32 | How to engage health service staff in recognising and supporting weight problems                                                                                                                                                                                                                                                       |
| 33 | What interventions are realistically delivered within the current NHS models of care e.g. nursing chronic disease reviews? How simple interventions or clinician training might impact. More of a focus on 1:1 interventions as well as Public health interventions.                                                                   |
| 34 |                                                                                                                                                                                                                                                                                                                                        |
| 35 |                                                                                                                                                                                                                                                                                                                                        |
| 36 | What strategies can be used by GPs to promote physical activity in obese people?                                                                                                                                                                                                                                                       |
| 37 | Do doctors have the information they need to help all weight related issues?                                                                                                                                                                                                                                                           |
| 38 |                                                                                                                                                                                                                                                                                                                                        |
| 39 | What is the baseline knowledge regarding what a healthy diet consists of in the population? Then look at sub groups e.g. age groups, depressed, diabetes etc. Also research what doctors knowledge is of healthy eating AND how important it is to health, how much they feel confident to discuss this with patients or have time to. |
| 40 |                                                                                                                                                                                                                                                                                                                                        |
| 41 | How confident are health professionals when raising the issue of weight, and what is their current skill level to have these conversations                                                                                                                                                                                             |
| 42 |                                                                                                                                                                                                                                                                                                                                        |

|    |                                                                                                                                                                        |
|----|------------------------------------------------------------------------------------------------------------------------------------------------------------------------|
| 1  | How can health professionals be more effectively utilised to support behaviour change conversations during routine interactions                                        |
| 2  | Consultation skills: confidence and capabilities of health care professionals in raising the issue in any points of contacts                                           |
| 3  | ... Training and education requirements of different healthcare professionals to advice on nutrition on diet the role of pharmacists in weight and obesity             |
| 4  | management... <i>(Rest of question used in two other sections)</i>                                                                                                     |
| 5  | How can we support implementation of obesity guidelines such that very person with obesity is offered significant support to reduce their weight with an acceptable    |
| 6  | chance of it working?                                                                                                                                                  |
| 7  |                                                                                                                                                                        |
| 8  | Is weight loss through diet or surgery of benefit for patients with type 1 diabetes?                                                                                   |
| 9  |                                                                                                                                                                        |
| 10 | Is weight loss surgery a good option for the severely obese, or would lifestyle changes/diet effect a similar long-term result?                                        |
| 11 | Should the threshold for consideration bariatric surgery be lowered?                                                                                                   |
| 12 | Is there any medication than can control appetite and suppress urges that is safe                                                                                      |
| 13 | Is there an effective satiety-inducing drug or other intervention?                                                                                                     |
| 14 | About the design of drugs for obesity, should it focus on drugs for weight loss or should it focus on drugs not to recover lost weight?                                |
| 15 |                                                                                                                                                                        |
| 16 | Where do medications fit in the treatment pathway?                                                                                                                     |
| 17 | Design of a new obesity measure apart from BMI.                                                                                                                        |
| 18 |                                                                                                                                                                        |
| 19 | A new 'BMI' i.e. we know that BMI is often not relevant. Would be great to come up with a new 'scoring' system related to risk with weight                             |
| 20 | Why is BMI still used as an indication of healthy weight?                                                                                                              |
| 21 | Is the BMI a good guide to healthy weight?                                                                                                                             |
| 22 |                                                                                                                                                                        |
| 23 | Why is BMI still used to define obesity?                                                                                                                               |
| 24 | With BMI being the crux of determining whether a person is overweight or not - is this notion now somewhat outdated?                                                   |
| 25 | Is BMI a reliable indicator of obesity, or not?                                                                                                                        |
| 26 |                                                                                                                                                                        |
| 27 | Why obesity seems somehow to be related to height but not frame size                                                                                                   |
| 28 | To produce a better version of a weight measure than BMI                                                                                                               |
| 29 | What better ways are there to assess weight other than BMI?                                                                                                            |
| 30 |                                                                                                                                                                        |
| 31 | Accurate diagnostic criteria for obesity                                                                                                                               |
| 32 | Is our definition of obesity accurate                                                                                                                                  |
| 33 |                                                                                                                                                                        |
| 34 | How accurate is a BMI as a guide to health if you are not an average body type?                                                                                        |
| 35 | What is the best way to estimate someone's healthy weight?                                                                                                             |
| 36 | When will a more appropriate classification of obesity be made, focusing on the origin of the disease, which is necessary for a better treatment?                      |
| 37 | Is the BMI an appropriate way to decide if you're overweight for everybody, e.g., for BAME people?                                                                     |
| 38 |                                                                                                                                                                        |
| 39 | How do I tell if I am a TOFI - Thin on Outside, Fat on Inside (i.e. around vital organs). I might be thin looking but have hidden fat issues.                          |
| 40 | The role of visceral fat [We are becoming increasingly aware that you can be 'skinny' but still unhealthy with regards to general health with high amounts of visceral |
| 41 | fat.]                                                                                                                                                                  |
| 42 |                                                                                                                                                                        |

|    |                                                                                                                                                                        |
|----|------------------------------------------------------------------------------------------------------------------------------------------------------------------------|
| 1  | Clothing size could be used as a measure of weight.                                                                                                                    |
| 2  | What are the body composition changes post-bariatric surgery with and without weight resistance exercise?                                                              |
| 3  | What is the best, simple measure of adiposity in children?                                                                                                             |
| 4  | Why is poor quality (highly processed) food so much cheaper than fresh/healthy food and how to get consumers to appreciate the health implications of each?            |
| 5  | How can we make whole nutritious food more accessible and affordable than heavily processed foods?                                                                     |
| 6  | What parts of the global food system are tending to increase the availability of unhealthy foods and what can be done to reverse these tendencies?                     |
| 7  | The effect on obesity if healthy food were cheaper and not healthy were very expensive                                                                                 |
| 8  | Decrease price of fresh food to enable people on low budget to stop eating processed foods.                                                                            |
| 9  | Changing the environment in supermarkets and high streets - how can these organisations be motivated to improve quality of food choices                                |
| 10 | How can we make healthier food more accessible, attractive and convenient?                                                                                             |
| 11 | The effect of the availability of various foods on eating choices and how the current system encourages or discourages the production of "healthy foods"               |
| 12 | How can we get nutritional advice/information to those most in need - e.g. low SES, obese                                                                              |
| 13 | For people living with financial hardship, do they have access to information on how to eat more healthily for the same amount of money? This is often difficult to    |
| 14 | achieve. It would be interesting to see what difference education in this area made to outcomes for people and their families. Do people with unhealthy eating habits  |
| 15 | because of a lack of interest/time to cook, and a tendency to eat fast food, do better if they are educated in ways to make healthy changes that do not take much time |
| 16 | and effort?                                                                                                                                                            |
| 17 | Health choices can sometimes be expensive can we do more to support cheaper locally sustainable options so that people can make healthy choices more                   |
| 18 | partnerships with supermarket chains                                                                                                                                   |
| 19 | Why is healthy food so expensive?                                                                                                                                      |
| 20 | Pensioners and the widowed find it difficult to access cheap or food for one meals. How can this be addressed?                                                         |
| 21 | What can we do to make healthier food more affordable and appealing to young people?                                                                                   |
| 22 | The sale of baby foods high in sugars continues to be a factor in the obesity of children. How can producers be impacted to produce more healthy foods for children?   |
| 23 | What research questions need to be addressed to support policy change which leads to stricter industry regulations on the size and composition of unhealthy foods      |
| 24 | available?                                                                                                                                                             |
| 25 | Research into whether government funded voluntary schemes for large retailers could help put better choices in front of consumers and change buying habits.            |
| 26 | What impact does packaging have - for example the packaging of sugary yogurts vs plain yogurts in people's choices                                                     |
| 27 | Should products have a link to what exercise would be needed if you eat/drink a particular product (ie walking, running for 30 minutes)                                |
| 28 | What efforts are being made to identify sugar/corn syrup/harmful additives content in food? Why are harmful vegetable oils still being used, especially for take-outs? |
| 29 | Can law be passed to embolden the content printing of harmful additives on containers? [How about advertisements/ doing further checks on school meals. Jamie          |
| 30 | Oliver did some great ground work. We need follow up.] <i>Second part of question used in another section.</i>                                                         |
| 31 | How is the degree of processing in the creation of pre-packaged foods best identified?                                                                                 |
| 32 | Should calories, fat and sugar in items be much more visible on labels and menus (traffic light)                                                                       |
| 33 |                                                                                                                                                                        |
| 34 |                                                                                                                                                                        |
| 35 |                                                                                                                                                                        |
| 36 |                                                                                                                                                                        |
| 37 |                                                                                                                                                                        |
| 38 |                                                                                                                                                                        |
| 39 |                                                                                                                                                                        |
| 40 |                                                                                                                                                                        |
| 41 |                                                                                                                                                                        |
| 42 |                                                                                                                                                                        |
| 43 |                                                                                                                                                                        |
| 44 |                                                                                                                                                                        |
| 45 |                                                                                                                                                                        |
| 46 |                                                                                                                                                                        |

|    |                                                                                                                                                                |
|----|----------------------------------------------------------------------------------------------------------------------------------------------------------------|
| 1  | How can we change social norms around the consumption of junk food / sugar?                                                                                    |
| 2  | The impact of reducing availability of energy dense foods on excess caloric intake                                                                             |
| 3  | How can we encourage restaurants to serve smaller portions (or people to make smaller portions at home)?                                                       |
| 4  | How can restaurants help with portion control and calorie content of their meals / what impact does this have on obesity levels?                               |
| 5  | Have you heard of aspartame?                                                                                                                                   |
| 6  | How does artificial sweetener affect weight gain or loss?                                                                                                      |
| 7  | Do we understand the biology of how zero or low calorie sweeteners, particularly diet drinks, effect obesity                                                   |
| 8  | What role does artificial sweetener intake have on appetite regulation?                                                                                        |
| 9  | Do the huge amount of chemicals that are now used in food and drink production methods affect how the body's metabolism/hormones work, are these               |
| 10 | unpronounceable chemicals contributing to obesity?                                                                                                             |
| 11 | Do you eat organic foods? [Do you know the benefits of organic & the harm of pesticides?]                                                                      |
| 12 | Are the nutrient and energy levels compromised in GMO crops resulting in malnutrition?                                                                         |
| 13 | Do GMO's contribute to obesity?                                                                                                                                |
| 14 | Do vitamin and mineral deficiencies cause or contribute to weight gain?                                                                                        |
| 15 | Natural ways to lose weight without dieting - how to lose the stubborn weight e.g. I only have 1 stone to lose not 10 but it's tough trying to lose it         |
| 16 | Which is more important on the long run, calorie deficit or macro nutrients composition?                                                                       |
| 17 | Do you see any link with diet and weight loss or weight gain                                                                                                   |
| 18 | Does the keto diet cause greater weight loss than a non keto diet if the same amount of calories are consumed?                                                 |
| 19 | What is the right way to eat? High carbohydrate and low fat or High Fat and low carbohydrate? There is so much conflicting information. Why is the medical     |
| 20 | profession so conflicted?                                                                                                                                      |
| 21 | What is more effective and healthy, low carbohydrate diets or low fat diets?                                                                                   |
| 22 | Does a low carb diet has long term side effects                                                                                                                |
| 23 | Is a high fay, low carb diet a good way to stop putting weight on the stomach?                                                                                 |
| 24 | Is a well formulated LCHF diet healthy in the long term?                                                                                                       |
| 25 | Is fat or sugar causing the obesity?                                                                                                                           |
| 26 | Is there a direct link between how much processed food is in a person diet to how many ailments may affect them later in life?                                 |
| 27 | What is the impact on weight of eating processes foods? E.g. is there a correlation between eating processes food and increased calorie intake or weight gain. |
| 28 | Plant based eating for weight loss                                                                                                                             |
| 29 | Are plant based diets associated with obesity prevention, weight loss, and weight-loss management?                                                             |
| 30 | Is vegan a good way to reduce obesity?                                                                                                                         |
| 31 | How much meat should we eat?                                                                                                                                   |
| 32 | Can being a vegetarian INCREASE weight?                                                                                                                        |
| 33 |                                                                                                                                                                |
| 34 |                                                                                                                                                                |
| 35 |                                                                                                                                                                |
| 36 |                                                                                                                                                                |
| 37 |                                                                                                                                                                |
| 38 |                                                                                                                                                                |
| 39 |                                                                                                                                                                |
| 40 |                                                                                                                                                                |
| 41 |                                                                                                                                                                |
| 42 |                                                                                                                                                                |
| 43 |                                                                                                                                                                |
| 44 |                                                                                                                                                                |
| 45 |                                                                                                                                                                |
| 46 |                                                                                                                                                                |



|    |                                                                                                                                                                                  |
|----|----------------------------------------------------------------------------------------------------------------------------------------------------------------------------------|
| 1  | Is it better to be vegetarian or eat meat fish etc.?                                                                                                                             |
| 2  | How to make all of us be more aware of the negative impact of high meat intake                                                                                                   |
| 3  | Is protein from animal sources bad for our health                                                                                                                                |
| 4  | How much harm does a high protein diet do to your body?                                                                                                                          |
| 5  | Effectiveness of VLCD use in specific cohorts e.g. children/adolescents or pregnancy?                                                                                            |
| 6  | I've seen press on very low calorie diets. I'd like to know if they really work and, if they do, how to do them? Does it have to be under the supervision of a GP or can I       |
| 7  | simply buy meal replacement products at a pharmacy and get the same results?                                                                                                     |
| 8  | How alcohol consumption influences weight gain.                                                                                                                                  |
| 9  | Low calories versus low carbs?                                                                                                                                                   |
| 10 | Should we teach mindfulness and especially mindful eating to all? Could this make a difference to how we view food and eating?                                                   |
| 11 | We need more research into how meditation & self-care practices can reduce emotional (non) eating.                                                                               |
| 12 | Can yoga help with weight loss?                                                                                                                                                  |
| 13 | Why is there no huge campaign about conscious eating? Slow eating? Learning to understand the feeling of hunger vs thirst                                                        |
| 14 | Do you often eat to the point of your stomach being uncomfortable?                                                                                                               |
| 15 | Is there a way to turn on the "I'm full" switch earlier to avoid overeating                                                                                                      |
| 16 | After my first diet I went on I got into a bad cycle of dieting or following a plan that doesn't work and end up bingeing or coming off the diet. I wasn't that big in the first |
| 17 | place but family members were telling me I was Bonny!                                                                                                                            |
| 18 | What is the rate of eating disordered behaviour in people with obesity, particularly those who repeatedly try to lose weight                                                     |
| 19 | What percentage of people are overweight because of disordered eating (I.e. mental health)?                                                                                      |
| 20 | The calorific values of food. how can we accurately assess the amount we eat                                                                                                     |
| 21 | Long term efficiency: Restrictive diets or permissive?                                                                                                                           |
| 22 | Is 'positive' messaging about dietary change (e.g. eat more fruit and veg, eat more fibre) more effective at maintaining a healthy weight than 'negative' messaging (e.g.        |
| 23 | eat less, fat, sugar, high calorie foods)?                                                                                                                                       |
| 24 | How much weight and how fast is it lost using time-restricted eating?                                                                                                            |
| 25 | Will intermittent fasting stop obesity                                                                                                                                           |
| 26 | Fasting and if that helps lose weight and maintain it.                                                                                                                           |
| 27 | Does intermittent fasting work better than calorie restriction on its own?                                                                                                       |
| 28 | Is intermittent fasting a good idea?                                                                                                                                             |
| 29 | Is the intermittent fasting a truly healthy lifestyle to adopt?                                                                                                                  |
| 30 | Is intermittent dieting/fasting good for health beyond weight loss                                                                                                               |
| 31 | Us fasting bad for your body? Either by restricting calories 2 days a week or eating in a 8 hour window                                                                          |
| 32 | What thoughts on keto intermittent fasting                                                                                                                                       |

|    |                                                                                                                                                                                                           |
|----|-----------------------------------------------------------------------------------------------------------------------------------------------------------------------------------------------------------|
| 1  | Do you know if you want to lose weight you should do intermittent fasting and you shouldn't eat carbohydrates?                                                                                            |
| 2  | How important is the timing of when you eat and what you eat?                                                                                                                                             |
| 3  | The best hours (or routines) to eat.                                                                                                                                                                      |
| 4  | How important is the practice of restricted time eating to weight control, metabolic health and well being                                                                                                |
| 5  | What is the impact of meal timing on weight, appetite and metabolic outcomes?                                                                                                                             |
| 6  | Late night eating (NE)                                                                                                                                                                                    |
| 7  | What foods should I avoid to help lose weight? [Should I be eating more protein after doing exercise and less carbs. it is quite confusing.]                                                              |
| 8  | Does the time between last meal at night and breakfast, the first meal in the morning have an effect on weight?                                                                                           |
| 9  | Is okay to skip breakfast?                                                                                                                                                                                |
| 10 | What impact does work hours (shifts / etc.) have on weight?                                                                                                                                               |
| 11 | Which is better for weight loss, the traditional 3 meals a day or snacking throughout the day?                                                                                                            |
| 12 | Is there really a difference between the different diets you read about in terms of diabetes remission? Can you get the same benefits with weight loss by any means?                                      |
| 13 | Insulin resistance and its role in weight gain and obesity... <i>(rest of question used in two other sections)</i>                                                                                        |
| 14 | Are you aware of the role insulin plays in the storage of fat?                                                                                                                                            |
| 15 | What other health conditions are directly impacted by obesity, as opposed to correlating with obesity?                                                                                                    |
| 16 | Are fat cells created after puberty?                                                                                                                                                                      |
| 17 | In the UK the shape of women's bodies has undergone a drastic change over the past couple of decades. What are the underlying causes, can we identify the people group, and how can we help reverse this? |
| 18 | Underlying issues when it comes to why people eat too much and or choose the wrong foods?                                                                                                                 |
| 19 | Look at why we eat from an environmental and behaviour perspective                                                                                                                                        |
| 20 | Does my emotional state influences my overeating?                                                                                                                                                         |
| 21 | Are overeating behaviours linked to emotional states? Do we eat more when happy or sad?                                                                                                                   |
| 22 | How can I disassociate eating from how I am feeling?                                                                                                                                                      |
| 23 | Research into eating habits and mood swings, i.e. when do they binge. Trigger points.                                                                                                                     |
| 24 | Mental mind set how is this managed?                                                                                                                                                                      |
| 25 | What is lacking (physically, emotionally or psychologically) when someone overeats and can we be taught to obtain this from another source?                                                               |
| 26 | Why are some people unable to not or stop eating foods they know are bad for their health?                                                                                                                |
| 27 | Best methods to suppress appetites                                                                                                                                                                        |
| 28 | How is the "I'm full now - you can stop eating" response triggered?                                                                                                                                       |
| 29 | Should we start our weight management by sleeping more?                                                                                                                                                   |
| 30 | What happens in the brain during weight regain?                                                                                                                                                           |
| 31 | What parts of the brain can we turn off to control the addiction?                                                                                                                                         |

|    |                                                                                                                                                                         |
|----|-------------------------------------------------------------------------------------------------------------------------------------------------------------------------|
| 1  | Is there an answer in neuroscience that actually physically disable the part of the brain responsible for the addiction? We do don't become addicted to alcohol / drugs |
| 2  | etc. so young because we are not exposed to them, but we are exposed to food, and the pattern is set.                                                                   |
| 3  | Impact of Autism on eating patterns                                                                                                                                     |
| 4  | Does stomach muscles have a direct link to satiety? If you have loose stomach muscles due to pregnancy , will you not feel full how much ever you eat                   |
| 5  | Energy Requirements for pre and post bariatric patients at various stages after surgery (e.g. 6mo, 12 mo, 18mo, 24mo)?                                                  |
| 6  | How do changes in body weight and composition influence the energy balance behaviours that may undermine weight management interventions                                |
| 7  | Diagnostic algorithm for cardiovascular risk stratification in patients with obesity                                                                                    |
| 8  | How much does the microbiome affect absorption and which foods (if any) can keep it at its optimal level                                                                |
| 9  | The mechanism behind the effect of the gut microbiome in obesity development.                                                                                           |
| 10 | To look at the microbiome of level 3 weight management services and see if they carry particular obesity genes and to see what the diversity of their gut microbes look |
| 11 | like.                                                                                                                                                                   |
| 12 | How does the microbiome influence body habitus - using metagenomics could contribute to this question                                                                   |
| 13 | Can faecal transplant impact weight                                                                                                                                     |
| 14 | Does healthy bacteria in the intestines affect /reduce weight gain?                                                                                                     |
| 15 | Can improving gut bacterial alongside dietary/ exercise interventions help increase weight loss and maintain weight loss?                                               |
| 16 | How can we change our gut microbiome to help maintain a healthy weight                                                                                                  |
| 17 | The best forms of pre- and pro-biotics to improve health and facilitate weight loss.                                                                                    |
| 18 | What effect does GOS supplementation happen on the adverse outcomes of obesity                                                                                          |
| 19 | Can Obesity cause or contribute to Cancer and Dementia?                                                                                                                 |
| 20 | To explore the relationship between the over-consumption of antibiotics and the increase in obesity.                                                                    |
| 21 | Can some antidepressant meds cause weight gain;                                                                                                                         |
| 22 | Which, and by how much, do prescribed medications adversely affect the patients weight?                                                                                 |
| 23 | Impact of medications on obesity                                                                                                                                        |
| 24 | What is the best way to don't put weight while taking sertraline?                                                                                                       |
| 25 | The effect of obesity on other health issues including dementia, arthritis etc.                                                                                         |
| 26 | Does losing weight reduce the risk of cancer and how much weight do you need to lose                                                                                    |
| 27 | Does weight loss reduce risk of heart failure in people with known heart failure?                                                                                       |
| 28 | Do patients with mild/moderate heart failure benefit from weight loss interventions?                                                                                    |
| 29 | Do obese people have more digestive problems than normal weight people?                                                                                                 |
| 30 | Weight loss plan for those with IBS and Diverticulitis and gluten intolerance                                                                                           |
| 31 | Does one specific type of diet work for a single disease (e.g. a vegan diet for cvd)?                                                                                   |
| 32 | Relationship between obesity and osteoarthritis (if any)                                                                                                                |

|    |                                                                                                                                                                                                                                                                                 |
|----|---------------------------------------------------------------------------------------------------------------------------------------------------------------------------------------------------------------------------------------------------------------------------------|
| 1  | How obesity affects bone health                                                                                                                                                                                                                                                 |
| 2  | Impact on joints                                                                                                                                                                                                                                                                |
| 3  | What impact does maintaining a healthy weight have on mobility (knee joints etc)?                                                                                                                                                                                               |
| 4  | Knee wear                                                                                                                                                                                                                                                                       |
| 5  | Hip wear                                                                                                                                                                                                                                                                        |
| 6  | In older adults exercise can be difficult due to rheumatic issues. How should diet accommodate this                                                                                                                                                                             |
| 7  | Is it better to aim to be slightly underweight to reduce stress on the joints in old age?                                                                                                                                                                                       |
| 8  | The relation between long term illness and weight gain.                                                                                                                                                                                                                         |
| 9  | Pain and Obesity, eating as an avoidance strategy for pain?                                                                                                                                                                                                                     |
| 10 | Why do women with polycystic ovaries often put on a lot of weight                                                                                                                                                                                                               |
| 11 | What effects do hormonal changes have on weight and how can one differentiate between gain due to hormones vs diet.                                                                                                                                                             |
| 12 | What level of BMI reduction is required to significantly increase the chance of ovulation for obese women with amenorrhoea as part of PCOS?                                                                                                                                     |
| 13 | How effective is weight loss as a treatment for PCOS?                                                                                                                                                                                                                           |
| 14 | What is the effect on weight gain of the removal of half of a thyroid gland and 16 months later a hysterectomy with the removal of ovaries?                                                                                                                                     |
| 15 | Under treatment of underactive thyroid: is there a need to review current guidelines and treat 'subclinical' hypothyroidism?                                                                                                                                                    |
| 16 | Do you have any medical condition, e.g. thyroid problems, which might cause obesity?                                                                                                                                                                                            |
| 17 | Do you feel you have become obese as a result of medical / physical condition or some other factor                                                                                                                                                                              |
| 18 | Why have I had a life long struggle with my weight, despite not over eating [I have only recently found out I have lipoedema. If I had known this earlier, things might have been different.]                                                                                   |
| 19 | What motivates and facilitates people with chronic illnesses who are overweight or obese to lose weight? Which biomedical and socioeconomic barriers do people face, that prevent them from being able to lose weight and what can be put in place to overcome these obstacles? |
| 20 | What effects does it have on the heart?                                                                                                                                                                                                                                         |
| 21 | If my type 2 diabetes is in remission (blood-sugar levels 5.4 or lower), am I still diabetic?                                                                                                                                                                                   |
| 22 | Does the amount of sugar eaten worsen liver disease                                                                                                                                                                                                                             |
| 23 | Is red meat bad for liver disease                                                                                                                                                                                                                                               |
| 24 | What is the impact of diagnosing non-alcohol related fatty liver disease as a motivator for people to lose weight                                                                                                                                                               |
| 25 | What evidence is there that children and teenagers post liver transplant will find it challenging to maintain a healthy weight?                                                                                                                                                 |
| 26 | Are obese people more likely to get colds                                                                                                                                                                                                                                       |
| 27 | Why do some men have man breasts [People suffer mental health issues due to this]                                                                                                                                                                                               |
| 28 | How much does obesity limit and impact our life                                                                                                                                                                                                                                 |
| 29 | What impacts does obesity have on health                                                                                                                                                                                                                                        |
| 30 | The role in obesity in relation to prevention of ill health? [Because prevention at an early stage will help improve the quality of life for a vast number of people]                                                                                                           |
| 31 |                                                                                                                                                                                                                                                                                 |
| 32 |                                                                                                                                                                                                                                                                                 |
| 33 |                                                                                                                                                                                                                                                                                 |
| 34 |                                                                                                                                                                                                                                                                                 |
| 35 |                                                                                                                                                                                                                                                                                 |
| 36 |                                                                                                                                                                                                                                                                                 |
| 37 |                                                                                                                                                                                                                                                                                 |
| 38 |                                                                                                                                                                                                                                                                                 |
| 39 |                                                                                                                                                                                                                                                                                 |
| 40 |                                                                                                                                                                                                                                                                                 |
| 41 |                                                                                                                                                                                                                                                                                 |
| 42 |                                                                                                                                                                                                                                                                                 |
| 43 |                                                                                                                                                                                                                                                                                 |
| 44 |                                                                                                                                                                                                                                                                                 |
| 45 |                                                                                                                                                                                                                                                                                 |
| 46 |                                                                                                                                                                                                                                                                                 |

|    |                                                                                                                                                                                                                                                                                                                                                         |
|----|---------------------------------------------------------------------------------------------------------------------------------------------------------------------------------------------------------------------------------------------------------------------------------------------------------------------------------------------------------|
| 1  | By how much does being obese affect your predicted life span                                                                                                                                                                                                                                                                                            |
| 2  | What is the life expectancy of obese people as compared to similar individuals who are not overweight?                                                                                                                                                                                                                                                  |
| 3  | What is the impact of obesity on peoples' lives including their life opportunities?                                                                                                                                                                                                                                                                     |
| 4  | What are the benefits versus harms/risks of weight loss using different weight loss methods or specific types/groups of people? [If you are genetically pre-disposed to obesity, are you better to live at a higher weight, if trying to reduce your weight leads to repeated weight cycling] ( <i>First part of question used in another section</i> ) |
| 5  |                                                                                                                                                                                                                                                                                                                                                         |
| 6  |                                                                                                                                                                                                                                                                                                                                                         |
| 7  | Do economic evaluations based on modelling of cohorts over-estimate the benefits of weight loss? [Does weight loss return people to the same risk of those who never gained weight in the first place?] ( <i>First part of question used in another section</i> )                                                                                       |
| 8  |                                                                                                                                                                                                                                                                                                                                                         |
| 9  |                                                                                                                                                                                                                                                                                                                                                         |
| 10 | The physiological impact of early menopause and weight gain.                                                                                                                                                                                                                                                                                            |
| 11 |                                                                                                                                                                                                                                                                                                                                                         |
| 12 | Understanding of why women put on weight before menopause when never previously struggled with weight                                                                                                                                                                                                                                                   |
| 13 | What is the effect of hormones during and after menopause on weight gain                                                                                                                                                                                                                                                                                |
| 14 | Why is weight loss so hard post menopause?                                                                                                                                                                                                                                                                                                              |
| 15 |                                                                                                                                                                                                                                                                                                                                                         |
| 16 | I've now come through the menopause and it is even more difficult to maintain a steady weight.                                                                                                                                                                                                                                                          |
| 17 |                                                                                                                                                                                                                                                                                                                                                         |
| 18 | Heavy/abnormal periods and whether they are weight related or not                                                                                                                                                                                                                                                                                       |
| 19 | Hormones/hormonal process. How they affect? Are these changes real? How could we counteract effects? Hormone injection for weight loss?                                                                                                                                                                                                                 |
| 20 |                                                                                                                                                                                                                                                                                                                                                         |
| 21 | The relationship between testosterone levels and visceral fat?                                                                                                                                                                                                                                                                                          |
| 22 | We know there is a relationship between high levels of visceral fat and low testosterone levels, and this is also associated with higher CVD risk. Is the converse true?                                                                                                                                                                                |
| 23 | Are higher levels of testosterone associated with lower levels of visceral fat and/or overall CVD risk                                                                                                                                                                                                                                                  |
| 24 | What impact do male/female hormones have on appetite/weight/metabolism?                                                                                                                                                                                                                                                                                 |
| 25 | Does a baby in utero have a higher risk of becoming obese if Mum is obese during pregnancy?                                                                                                                                                                                                                                                             |
| 26 |                                                                                                                                                                                                                                                                                                                                                         |
| 27 | How targeting prenatal development can reduce obesity risk                                                                                                                                                                                                                                                                                              |
| 28 | How can we prevent young women gaining excessive weight, including during and between pregnancies.                                                                                                                                                                                                                                                      |
| 29 | What is the effectiveness of weight management programs in the postnatal period and does this lead to a reduced BMI in subsequent pregnancies?                                                                                                                                                                                                          |
| 30 |                                                                                                                                                                                                                                                                                                                                                         |
| 31 | Weight increase in pregnancy                                                                                                                                                                                                                                                                                                                            |
| 32 | What is the most effective method to reduce gestational weight gain in obese women?                                                                                                                                                                                                                                                                     |
| 33 | We're you breastfed as a baby? [As a mother who has struggled with breastfeeding but has persevered due to the many health benefits, I would like to know more and to have better research on the impact of breastfeeding and weaning on obesity later in life.]                                                                                        |
| 34 |                                                                                                                                                                                                                                                                                                                                                         |
| 35 |                                                                                                                                                                                                                                                                                                                                                         |
| 36 | Does educating school children about how to make healthy eating choices, prepare nutritious food quickly, and shop for healthy food at a low cost make a difference to their overall health and weight in the long term?                                                                                                                                |
| 37 |                                                                                                                                                                                                                                                                                                                                                         |
| 38 |                                                                                                                                                                                                                                                                                                                                                         |
| 39 | Does educating children within schools on healthy eating help prevent obesity?                                                                                                                                                                                                                                                                          |
| 40 | Do you think if prevention was started in primary school your outcomes would have been improved?                                                                                                                                                                                                                                                        |
| 41 | How to prevent obesity in young people and inform at schools?                                                                                                                                                                                                                                                                                           |
| 42 |                                                                                                                                                                                                                                                                                                                                                         |

|    |                                                                                                                                                                                               |
|----|-----------------------------------------------------------------------------------------------------------------------------------------------------------------------------------------------|
| 1  | What more can be done at a primary school level to tackle obesity?                                                                                                                            |
| 2  | Are children educated about this topic                                                                                                                                                        |
| 3  | How to avoid childhood obesity and help child stay a healthy weight                                                                                                                           |
| 4  | What are the most effective health promotion interventions to halt weight increases in children between the ages of 5 and 11?                                                                 |
| 5  | Which specific factors within health promotion interventions to promote healthy weight on school aged children are effective?                                                                 |
| 6  | Why/how/what has had an impact on the areas where we are seeing a reduction in childhood obesity?                                                                                             |
| 7  | How can we reduce childhood obesity and make sure children grow up with healthy diets?                                                                                                        |
| 8  | What are the most effective interventions for the prevention of childhood obesity globally and are they implementable in the UK?                                                              |
| 9  | Weight in children                                                                                                                                                                            |
| 10 | Policy to promote healthy lifestyle and physical exercise from early age                                                                                                                      |
| 11 | What age does healthy eating need to be established in order to prevent adult obesity?                                                                                                        |
| 12 | What works in preventing childhood obesity? What works to help people maintain a healthy weight? What works long term to help people lose weight? The influence of mind over body in obesity? |
| 13 | Childhood obesity prevention                                                                                                                                                                  |
| 14 | How can childhood obesity be prevented?                                                                                                                                                       |
| 15 | How to prevent obesity in young people and inform at schools?                                                                                                                                 |
| 16 | Should counselling be provided to school children who are overweight?                                                                                                                         |
| 17 | Maintenance of a healthy diet, with group counselling all the way through school.                                                                                                             |
| 18 | Should schools place a higher priority on nutrition education and cooking skills?                                                                                                             |
| 19 | Would increasing the provision of home economics e.g. cooking skills, budgeting skills, reduce the incidence of adult/childhood obesity                                                       |
| 20 | Would better nutrition/cookery courses throughout a child's WHOLE school life make a difference to their understanding of healthy eating?                                                     |
| 21 | What are the essential elements of school food education programs that help children learn positive food behaviours?                                                                          |
| 22 | How can we educate/promote sensible choices from childhood when sugar is everywhere? Would this make more sensible adults?                                                                    |
| 23 | How can effective school food education programs be leveraged to influence the home environment?                                                                                              |
| 24 | How do we encourage parents to establish healthy eating habits in their kids?                                                                                                                 |
| 25 | Are parents educated to the consequences of bad eating habits in their children?                                                                                                              |
| 26 | There is a need for greater funding for personnel and locations for education of parents regarding healthy nutrition. How can this situation be reversed and made more of a priority?         |
| 27 | How to help families with children under the age of 11 avoid their children putting on too much weight                                                                                        |
| 28 | How can we best support children and families to change long term behaviour for weight loss                                                                                                   |
| 29 | How do we engage parents in meaningful conversations to raise the topic of overweight/healthy growth in an effective manner?                                                                  |
| 30 | What is the best way to encourage children to eat healthily?                                                                                                                                  |
| 31 |                                                                                                                                                                                               |
| 32 |                                                                                                                                                                                               |
| 33 |                                                                                                                                                                                               |
| 34 |                                                                                                                                                                                               |
| 35 |                                                                                                                                                                                               |
| 36 |                                                                                                                                                                                               |
| 37 |                                                                                                                                                                                               |
| 38 |                                                                                                                                                                                               |
| 39 |                                                                                                                                                                                               |
| 40 |                                                                                                                                                                                               |
| 41 |                                                                                                                                                                                               |
| 42 |                                                                                                                                                                                               |
| 43 |                                                                                                                                                                                               |
| 44 |                                                                                                                                                                                               |
| 45 |                                                                                                                                                                                               |
| 46 |                                                                                                                                                                                               |

|    |                                                                                                                                                                                                                                                                                                                                                                                                                                                                                                                                                                                                                                           |
|----|-------------------------------------------------------------------------------------------------------------------------------------------------------------------------------------------------------------------------------------------------------------------------------------------------------------------------------------------------------------------------------------------------------------------------------------------------------------------------------------------------------------------------------------------------------------------------------------------------------------------------------------------|
| 1  | How can we most effectively engage with an adolescent population regarding diet & exercise?                                                                                                                                                                                                                                                                                                                                                                                                                                                                                                                                               |
| 2  | Diet and weight in adolescents.                                                                                                                                                                                                                                                                                                                                                                                                                                                                                                                                                                                                           |
| 3  | How best to engage teenagers in exercise programmes?                                                                                                                                                                                                                                                                                                                                                                                                                                                                                                                                                                                      |
| 4  | What can we do to keep children active into adolescence and adulthood?                                                                                                                                                                                                                                                                                                                                                                                                                                                                                                                                                                    |
| 5  | Would 1 hour a day of physical activity / sport per day in state schools lead to improved health and obesity levels in children and adolescents and improved habits and health in to adulthood? (97% of school population in the state sector. Independent schools already spend more time doing sport than state schools.)                                                                                                                                                                                                                                                                                                               |
| 6  | Strategies to prevent weight gain young adult                                                                                                                                                                                                                                                                                                                                                                                                                                                                                                                                                                                             |
| 7  | What support is best for obese teenagers?                                                                                                                                                                                                                                                                                                                                                                                                                                                                                                                                                                                                 |
| 8  | How to prevent childhood obesity - particularly in UK ethnic minorities and deprived populations.                                                                                                                                                                                                                                                                                                                                                                                                                                                                                                                                         |
| 9  | How do we iron out the social gradient in obesity prevalence, particularly in children?                                                                                                                                                                                                                                                                                                                                                                                                                                                                                                                                                   |
| 10 | Children between 1 year and 4 years are found to be overweight by health visitors. They do not qualify for a healthy weight and exercise programme until they are 4.                                                                                                                                                                                                                                                                                                                                                                                                                                                                      |
| 11 | What are the best ways of managing these children?                                                                                                                                                                                                                                                                                                                                                                                                                                                                                                                                                                                        |
| 12 | Practical education and will help confront the problem and bring resolution. Group therapy is effective amongst a group of people who experience great social difficulty.                                                                                                                                                                                                                                                                                                                                                                                                                                                                 |
| 13 | How to encourage Healthy meals uptake in school settings                                                                                                                                                                                                                                                                                                                                                                                                                                                                                                                                                                                  |
| 14 | Is adult obesity related to parental attitudes to food and eating?                                                                                                                                                                                                                                                                                                                                                                                                                                                                                                                                                                        |
| 15 | Can we improve coded weight/height/BMI data for children in the GP record? I have an interest in Childhood obesity and would be interested in considering process that would help to code weight related data in the primary care record. There are currently over 27,000 children aged 0-16yrs with registered GP practices in Oxford alone, of these only 19 children had recorded BMI >25, yet we know through NCMP data the prevalence of higher weight status far exceeds this, plus we know very few contacts with families through current programmes for tackling this (e.g. 2019 NCMP only generated 4 referrals in Oxfordshire) |
| 16 | What are the current effects of the National Childhood Measurement Programme in terms of weight trajectories, health care usage, and mental health?                                                                                                                                                                                                                                                                                                                                                                                                                                                                                       |
| 17 | Is NCMP fit for purpose if, as in many places, it is to become a screening programme/pathway into child weight management?                                                                                                                                                                                                                                                                                                                                                                                                                                                                                                                |
| 18 | What are the repercussions of obesity in childhood, in later life?                                                                                                                                                                                                                                                                                                                                                                                                                                                                                                                                                                        |
| 19 | Does obesity impact on children's long term educational outcomes?                                                                                                                                                                                                                                                                                                                                                                                                                                                                                                                                                                         |
| 20 | Does obesity impact on children's long term life chances?                                                                                                                                                                                                                                                                                                                                                                                                                                                                                                                                                                                 |
| 21 | How does obesity impact on children's happiness, confidence and mental health?                                                                                                                                                                                                                                                                                                                                                                                                                                                                                                                                                            |
| 22 | To explore the relationship between adverse childhood events (ACES) and obesity at a population level.                                                                                                                                                                                                                                                                                                                                                                                                                                                                                                                                    |
| 23 | The relationship between ACE and obesity (either childhood development or adult).                                                                                                                                                                                                                                                                                                                                                                                                                                                                                                                                                         |
| 24 | Did you have an easy/stress free childhood?                                                                                                                                                                                                                                                                                                                                                                                                                                                                                                                                                                                               |
| 25 | Do childhood or adolescent negative events have an impact on unhealthy eating?                                                                                                                                                                                                                                                                                                                                                                                                                                                                                                                                                            |
| 26 | Is there a connection with mental trauma in childhood to obesity?                                                                                                                                                                                                                                                                                                                                                                                                                                                                                                                                                                         |
| 27 | We need more research into the role of childhood trauma in causing obesity and / or weight related issues in adulthood.                                                                                                                                                                                                                                                                                                                                                                                                                                                                                                                   |

|    |                                                                                                                                                                         |
|----|-------------------------------------------------------------------------------------------------------------------------------------------------------------------------|
| 1  | Childhood trauma and being morbidly obese                                                                                                                               |
| 2  | What treatments for obesity should be available to children/adolescents?                                                                                                |
| 3  | What effective management options are there for paediatric obesity - who should people be referred to/supported by? And how widely available/accessible are these       |
| 4  | currently?                                                                                                                                                              |
| 5  | ... Is there any improvement in the figures for schools which provide lunches/boarding schools? <i>(First part of question answered see 748)</i>                        |
| 6  | [What efforts are being made to identify sugar/corn syrup/harmful additives content in food? Why are harmful vegetable oils still being used, especially for take-outs? |
| 7  | Can law be passed to embolden the content printing of harmful additives on containers?] How about advertisements/ doing further checks on school meals. Jamie           |
| 8  | Oliver did some great ground work. We need follow up. <i>(First part of question used in another section)</i>                                                           |
| 9  |                                                                                                                                                                         |
| 10 |                                                                                                                                                                         |
| 11 | How to get the rest of your family on board with supporting in your efforts to transition to a more healthy routine                                                     |
| 12 | How do participatory approaches with families within the community setting influence implementation and influence on healthy weight behaviours?                         |
| 13 | Parents often do not engage with healthy weight programmes because they deny their children are overweight. How can parents be more active in recognition of            |
| 14 | overweight children?                                                                                                                                                    |
| 15 | How much is related to socially and family dysfunctional lives                                                                                                          |
| 16 | How do we assess and monitor diet quality in infants, older children and adolescents in a valid, robust, consistent and pragmatic way?                                  |
| 17 | How do we assess and monitor diet quality in infants, older children and adolescents in a valid, robust, consistent and pragmatic way?                                  |
| 18 | How can I make quick and easy meals with minimal effort so that I lose weight?                                                                                          |
| 19 | Can you cook                                                                                                                                                            |
| 20 | Benefits of local communities teaching basic cookery skills                                                                                                             |
| 21 | Encouraging people to grow healthy foods                                                                                                                                |
| 22 | Has the plethora of cookery related programmes on TV had any impact on the nations diet or are they pure entertainment, unrelated to what/how people eat                |
| 23 | Are images of obese people in dieting information sheets motivating or demotivating.                                                                                    |
| 24 | Do food choices based on environmental and sustainability concerns influence weight status in young people?                                                             |
| 25 | If we change the words and conversations we have around weight and bodies and food, could this be the biggest difference we need in battling the emotional, mental      |
| 26 | and physical damage done to us by over or under eating, and society's obsession with the body perfect?                                                                  |
| 27 | What are the consequences of weight stigma on physical health                                                                                                           |
| 28 | How can we combat obesity stigmatisation and discrimination?                                                                                                            |
| 29 | How can we reduce weight stigma and discrimination in the society?                                                                                                      |
| 30 | What can be done to change society's attitude towards obese people?                                                                                                     |
| 31 | What terms could be used instead of obesity to describe the policy area?                                                                                                |
| 32 | What are you doing to prevent people being/feeling shamed because of their weight?                                                                                      |
| 33 | How can we reduce obesity stigma?                                                                                                                                       |
| 34 | How can we reduce the stigma of weight regain?                                                                                                                          |
| 35 | How can we reduce the stigma of weight regain?                                                                                                                          |
| 36 | How can we reduce the stigma of weight regain?                                                                                                                          |
| 37 | How can we reduce the stigma of weight regain?                                                                                                                          |
| 38 | How can we reduce the stigma of weight regain?                                                                                                                          |
| 39 | How can we reduce the stigma of weight regain?                                                                                                                          |
| 40 | How can we reduce the stigma of weight regain?                                                                                                                          |
| 41 | 10. What communication is needed to change public perception of Obesity?                                                                                                |
| 42 |                                                                                                                                                                         |



|    |                                                                                                                                                                                                                                                                    |
|----|--------------------------------------------------------------------------------------------------------------------------------------------------------------------------------------------------------------------------------------------------------------------|
| 1  | What are the effects of weight stigma?                                                                                                                                                                                                                             |
| 2  | How should stigma around obesity be dealt with?                                                                                                                                                                                                                    |
| 3  | How can we combat weight stigma?                                                                                                                                                                                                                                   |
| 4  | Help to address the stigma around weight and weight loss                                                                                                                                                                                                           |
| 5  | How can public health messaging about overweight/obesity be delivered to maximise effectiveness and minimise stigma?                                                                                                                                               |
| 6  | Do GPs assume that obesity is the fault of the patient rather than something to do with food marketing and/or healthier food availability for poorer people?                                                                                                       |
| 7  | What can we do to shift an entrenched view within our society (including among some healthcare professionals) that those living with overweight/obesity are entirely responsible for their condition?                                                              |
| 8  | Is there an institutional bias against people with obesity in NHS England, trusts, CCGs and the country in general?                                                                                                                                                |
| 9  | Can we reduce weight bias in health professionals (GPs, nurses, dietitians)?                                                                                                                                                                                       |
| 10 | Do health staff treat obese people differently, and less favourably, than those of recommended weight?                                                                                                                                                             |
| 11 | How can we reduce health inequalities for obese people, wrt prejudice they may face from medics, whether conscious or unconscious?                                                                                                                                 |
| 12 | Do GPs assume those with lower BMIs (20-25) are somehow healthier (or more likely to be healthy) than those with higher BMIs?                                                                                                                                      |
| 13 | Why aren't people living with obesity given the same consideration as others with chronic diseases?                                                                                                                                                                |
| 14 | Are overweight people less likely to receive appropriate health investigation as obesity is seen as causative first, rather than following the same diagnostic route that you would immediately follow with a person whose weight is considered normal/acceptable? |
| 15 | Why are people who are obese not given the same access to healthcare? People who are obese are blocked from receiving NHS surgery by virtue of their weigh. Why is the NHS discriminatory against obese people in the supply of surgical procedures?               |
| 16 | Does obesity stigma influence healthcare professional referral practices                                                                                                                                                                                           |
| 17 | Is access to primary care compromised for people classified as overweight or obese because GPs tend to focus on that rather than the concern/symptom the patient actually presented with?                                                                          |
| 18 | Explore whether how all health care professionals are trained around obesity perpetuates weight stigma attitudes which are then reflected in their delivery of care                                                                                                |
| 19 | What words used in a GP consultation influence a person's desire to change their eating habits? (Evidence based)                                                                                                                                                   |
| 20 | How can GPs tackle consultations regarding weight loss in the most sensitive manner? Should the emphasis be on diet as opposed to weight at all?                                                                                                                   |
| 21 | Are you happy with your weight?                                                                                                                                                                                                                                    |
| 22 | I, as an individual, have been received as better thin than fat.                                                                                                                                                                                                   |
| 23 | Do current BMI bands and definitions make sense to the public?                                                                                                                                                                                                     |
| 24 | What forms our image of a healthy body and how can this be used to promote a healthy weight and how society be educated in what is a healthy body weight?                                                                                                          |
| 25 | Why is obesity accepted as a norm and not treated as a serious problem?                                                                                                                                                                                            |
| 26 | Is society's acceptance of obesity creating a feeling in the obese that it is okay to neglect yourself in the way?                                                                                                                                                 |
| 27 | Is the body positivity movement ok? Is it ok to celebrate morbidly obese body shapes?                                                                                                                                                                              |
| 28 | What role does constant media talk of the obesity crisis or 'drain on NHS have on weight bias and perpetuating obesity?                                                                                                                                            |

|    |                                                                                                                                                          |
|----|----------------------------------------------------------------------------------------------------------------------------------------------------------|
| 1  | How does the internet, and specifically social media, affect the drive to eat?                                                                           |
| 2  | Does social media influence eating behaviours?                                                                                                           |
| 3  | What role has the media played in causing obese people to have low self-esteem?                                                                          |
| 4  | How much is obesity related to education and personal responsibility                                                                                     |
| 5  | Why don't people who are obese make an effort to lose weight? Is it a lack of dietary understanding; poor motivation: or acceptance of their body image? |
| 6  | Why do people continue to be obese, when we have plenty of evidence to tell people how not to be?                                                        |
| 7  | Is it a mind-set problem that causes people to be obese and not deal with it?                                                                            |
| 8  | What role should personal responsibility play in obesity discussions?                                                                                    |
| 9  | Why is there not more emphasis on personal responsibility when it comes to weight control?                                                               |
| 10 | Why don't people take ownership of their own health practices                                                                                            |
| 11 | What is the link between depression and being overweight                                                                                                 |
| 12 | How does being overweight make you feel?                                                                                                                 |
| 13 | Mental health and obesity                                                                                                                                |
| 14 | The psychological reasons that trigger obesity                                                                                                           |
| 15 | What is the psychology behind obesity?                                                                                                                   |
| 16 | How would you relate your weight to you mental health?                                                                                                   |
| 17 | Mental Health issues, probably also relates to question above                                                                                            |
| 18 | Correlation of mental health issues with obesity.                                                                                                        |
| 19 | Totally life changing after being depressed about weight gain                                                                                            |
| 20 | How does obesity affect mental health?                                                                                                                   |
| 21 | What causal mechanisms link the social experience of obesity to poor mental health outcomes?                                                             |
| 22 | Have you considered obesity as a mental health issue, as well as a physical one?                                                                         |
| 23 | Is there a non-physiological trigger for obesity (such as a psychological trigger like bullying which lead to comfort eating)?                           |
| 24 | Is there any correlation between mental health illness and obesity?                                                                                      |
| 25 | The physiological impact of stress and weight gain.                                                                                                      |
| 26 | What are the effects of diet culture and a focus on weight loss on individuals' mental health?                                                           |
| 27 | What are the physical and mental health effects of repeated dieting                                                                                      |
| 28 | How have past diets impacted on my health?                                                                                                               |
| 29 | What is the impact of repeated dieting on health?                                                                                                        |
| 30 | Understanding the impact of repeated attempts to change lifestyle habits e.g. is there a parallel with quit attempts                                     |
| 31 | How does others perspectives on a person's weight impacted their mental health?                                                                          |
| 32 |                                                                                                                                                          |
| 33 |                                                                                                                                                          |
| 34 |                                                                                                                                                          |
| 35 |                                                                                                                                                          |
| 36 |                                                                                                                                                          |
| 37 |                                                                                                                                                          |
| 38 |                                                                                                                                                          |
| 39 |                                                                                                                                                          |
| 40 |                                                                                                                                                          |
| 41 |                                                                                                                                                          |
| 42 |                                                                                                                                                          |
| 43 |                                                                                                                                                          |
| 44 |                                                                                                                                                          |
| 45 |                                                                                                                                                          |
| 46 |                                                                                                                                                          |

|    |                                                                                                                                                                                                                                                   |
|----|---------------------------------------------------------------------------------------------------------------------------------------------------------------------------------------------------------------------------------------------------|
| 1  | Why are there so many physical, mental and emotional implications from being overweight?                                                                                                                                                          |
| 2  | Why is obesity detrimental for people?                                                                                                                                                                                                            |
| 3  | What's the effect of obesity on self confidence                                                                                                                                                                                                   |
| 4  | Over-giving to others as an defence against low self-esteem and driver of obesity                                                                                                                                                                 |
| 5  | How do you feel as a fat person How do people view you as a fat person Do fat people smell Are thin people better than fat people                                                                                                                 |
| 6  | How does obesity affect social behaviour and self-esteem?                                                                                                                                                                                         |
| 7  | How does being obese impact social interactions, and how obese people feel they are perceived?                                                                                                                                                    |
| 8  | We need more research into how, if we help individuals identify and understand how they are feeling, that aids a reduction in emotional (non) eating.                                                                                             |
| 9  | Can interventions that address emotional or social overeating be effective?                                                                                                                                                                       |
| 10 | Does therapy help to eliminate emotional eating I                                                                                                                                                                                                 |
| 11 | How to break the habit of using food for comfort.                                                                                                                                                                                                 |
| 12 | What mental health/emotional support best helps a person living with obesity?                                                                                                                                                                     |
| 13 | Overcoming psychological barriers to weight management - can this lead to weight loss when the focus is not on weight?                                                                                                                            |
| 14 | How can the psychological component of obesity be addressed?                                                                                                                                                                                      |
| 15 | Are self-image, self-care and self-confidence sufficiently taken into account in current weight reduction and healthy weight programmes?                                                                                                          |
| 16 | Mental health...why is this so important when losing weight? Would a diet based in mental support only be as effective?                                                                                                                           |
| 17 | To look at the impact of trauma focused therapy upon weight loss                                                                                                                                                                                  |
| 18 | Research further: Eating is used as a psychological avoidance strategy to avoid contact with past trauma which causes beliefs/feelings of "I'm not ok or I'm empty" and as a way of avoiding experiencing present feelings and negative thoughts? |
| 19 | How to maintain good mental health when struggling with your physical health - in this case, obesity.                                                                                                                                             |
| 20 | To ask when the client first started eating more food.                                                                                                                                                                                            |
| 21 | How do I get surgery on NHS my dr says Im depressed and my health suffering                                                                                                                                                                       |
| 22 | How should weight management services and pathways be optimised for populations with serious mental illness?                                                                                                                                      |
| 23 | The link between obesity and depression is well known. Yet why is it, in the absence of thorough investigatory medical care, antidepressants are prescribed to obese people without explanation that these drugs will contribute to weight gain?  |
| 24 | ...Weight gain and obesity in severe mental illness - how do we manage this? ( <i>Question used in two other sections</i> )                                                                                                                       |
| 25 | Do you eat when stressed?                                                                                                                                                                                                                         |
| 26 | How does stress relate to weight gain                                                                                                                                                                                                             |
| 27 | Are you stressed? Do you think you are on top of things in your life? What is work like?                                                                                                                                                          |
| 28 | Tackling stress to affect obesity                                                                                                                                                                                                                 |
| 29 | How can we reduce or prevent the impulse to eat in people with obesity?                                                                                                                                                                           |
| 30 | Is sugar addictive?                                                                                                                                                                                                                               |
| 31 |                                                                                                                                                                                                                                                   |
| 32 |                                                                                                                                                                                                                                                   |
| 33 |                                                                                                                                                                                                                                                   |
| 34 |                                                                                                                                                                                                                                                   |
| 35 |                                                                                                                                                                                                                                                   |
| 36 |                                                                                                                                                                                                                                                   |
| 37 |                                                                                                                                                                                                                                                   |
| 38 |                                                                                                                                                                                                                                                   |
| 39 |                                                                                                                                                                                                                                                   |
| 40 |                                                                                                                                                                                                                                                   |
| 41 |                                                                                                                                                                                                                                                   |
| 42 |                                                                                                                                                                                                                                                   |
| 43 |                                                                                                                                                                                                                                                   |
| 44 |                                                                                                                                                                                                                                                   |
| 45 |                                                                                                                                                                                                                                                   |
| 46 |                                                                                                                                                                                                                                                   |

|    |                                                                                                                                                  |
|----|--------------------------------------------------------------------------------------------------------------------------------------------------|
| 1  | Helping obese people psychologically to overcome food addiction.                                                                                 |
| 2  | How the addiction to food becomes an issue so young .                                                                                            |
| 3  | How do you stop food addiction                                                                                                                   |
| 4  | How can you turn off the sugar cravings?                                                                                                         |
| 5  | Treatments to modulate hedonistic behaviours - salt intake, confectionery intake, etc                                                            |
| 6  | What does sugar do to your body and why do I crave it?                                                                                           |
| 7  | Does sugar make you fat?                                                                                                                         |
| 8  | Understanding of body treating all carbs as sugar. Seems hard to believe that bread and a chocolate bar can both be treated by the body as sugar |
| 9  | How to minimise late night comfort eating                                                                                                        |
| 10 | Why do some people crave carbohydrates and do some people react differently to certain carbohydrates.                                            |
| 11 | Do you eat when you aren't hungry?                                                                                                               |
| 12 | Why do people eat when they're not hungry? What is the link between emotion and consumption? Is there a biological driver?                       |
| 13 | How unhealthy eating, mental health and alcohol misuse interplay. What is the most effective way in to tackling this?                            |
| 14 | Can overeating be seen as a type of self-harm?                                                                                                   |
| 15 |                                                                                                                                                  |
| 16 |                                                                                                                                                  |
| 17 |                                                                                                                                                  |
| 18 |                                                                                                                                                  |
| 19 |                                                                                                                                                  |
| 20 |                                                                                                                                                  |
| 21 |                                                                                                                                                  |
| 22 |                                                                                                                                                  |
| 23 |                                                                                                                                                  |
| 24 |                                                                                                                                                  |
| 25 |                                                                                                                                                  |
| 26 |                                                                                                                                                  |
| 27 |                                                                                                                                                  |
| 28 |                                                                                                                                                  |
| 29 |                                                                                                                                                  |
| 30 |                                                                                                                                                  |
| 31 |                                                                                                                                                  |
| 32 |                                                                                                                                                  |
| 33 |                                                                                                                                                  |
| 34 |                                                                                                                                                  |
| 35 |                                                                                                                                                  |
| 36 |                                                                                                                                                  |
| 37 |                                                                                                                                                  |
| 38 |                                                                                                                                                  |
| 39 |                                                                                                                                                  |
| 40 |                                                                                                                                                  |
| 41 |                                                                                                                                                  |
| 42 |                                                                                                                                                  |
| 43 |                                                                                                                                                  |
| 44 |                                                                                                                                                  |
| 45 |                                                                                                                                                  |
| 46 |                                                                                                                                                  |

**Supplementary Table 2: Excluded questions****Not a research question (N=76)**

What is your correct weight bearing in mind BMI

How do I find out what is normal and healthy for my age and gender?

How is obesity measured?

Why do you think you are overweight?

Should obesity be considered a disease?

Staging of obesity

What is Obesity? Specific definition and subtypes.

How to encourage Healthy meals uptake in school settings.

How much damage to our bodies and how they work do fad diets actually achieve? Are we not just chasing an expectation that doesn't exist?

How to navigate and choose the best diet type?

Do you know the three macronutrients?

How can I get past health information on food products to understand what is bad in them, not just what is good?

healthy diet promotion and education

Why is sugar so freely available?

Why, as consumers, are we sold unhealthy food to eat? If trans-fatty acids are as bad for our health as is now being said why is the medical profession, the government and the authorities not informing people? Why are they not preventing the sale and banning the production of processed foods containing these fats?

What are the corporate determinants of obesity/body-weight?

How do we get government to implement more effective policies regarding selling and producing unhealthy food etc.

How does obesity policy fit into wider public health policy?

When was the latest guidance on nutrition in obesity published and who recommended/reviewed it.

What is the current and best guidelines to use

How much natural, non-processed food do you eat?

The only downfall is the excess saggy skin Is it possible to be 'overweight' but still in good health?

Does a 'healthy' BMI always reflect healthy physiology? Can you be overweight and healthy?

Can one be healthy at any weight?

My parents are both type 2 diabetic, lifestyle-induced. Does this mean I am certain to be as well?

Do you have any medical / physical conditions

Should obesity be recognised as a disease?

Is it calories in and then exercise means calories out ?

How can we bring more 'eating behaviours' interventions into standard practice?

1 Do we need to focus on body weight or risk factors/health?

2 Lap band had 12 years ago worked but broke last feb had removed had bypass in June in Latvia at much expense didn't work

3 will there be a miracle cure in the future?

4 Is there a "cure" for obesity?

5 What are the psychological contradictions for Bariatric Surgery?

6 Should there be more psychological assessment available for those with obesity other than those with diagnosed eating disorders?

7 Post operative psychological advice is lacking. This is only open to specific individuals? Other than funding, why has this not be identified as an integral part of the  
8 bariatric process

9 Would psychological counselling regarding eating behaviours make people more likely to loose weight and maintain it? I am about to start a program of counselling as  
10 a pre requisite for bariatric surgery. I have also had experience with Overeaters Anonymous. I feel that half the battle when it comes to obesity is mental & emotional.

11 Can obesity now be labelled as an eating disorder as it is without a doubt disordered eating and results from many if the same complex psychological, emotional and  
12 behavioural issues as anorexia, bulimia etc and can have equally devastating results mentally and physically.

13 Psychologically informed services, training etc

14 Do fat people need to feel bad about themselves?

15 Do you enjoy food

16 To ask the client how they think they would feel if they were able to lose weight and what they miss doing the most.

17 Do you require and emotional or psychological help or guidance?

18 Do you think you would be happier if you were not obese?

19 Are you happy with your size

20 Can increased metabolism rate means you can eat more food

21 How do you speed up your metabolism?

22 On a scale of 1 to 10 (with 10 being the happiest), how happy are you with your weight?

23 What would make it a 10?

24 What could we do to help you make it a 10?

25 What could you do to help you make it a 10?

26 What do you already understand about obesity and weight management?

27 to change diets and attitudes to food

28 Does shaming obese people really work

29 Why are the aids via drugs which are available in the USA ignored in the uk

30 Are there safe drugs available to treat the condition?

31 Is there a magic pill that you can take to lose weight?

32 What level / amount of physical activity / exercise do you undertake in an average week

1 What is your weekly routine in terms of "movement": how often do you exercise, do you walk to work - if yes how far, do you walk up the stairs or use the escalator  
2 and so on, if you have a dog, do you take it for a walk and how long are those, how busy is you after work life: do you have to manage the kids or do you come home  
3 and sit in front of the TV.

4 Does the person do regular exercise to manage weight

5 Do you do any exercise?

6 What can we learn from the epidemiology of obesity to help in terms of prevention?

7 Do you think it's possible to lose weight and would you like help to lose your excess weight.

8 Why if you ever manage to lose weight, having wasted your life in fat, does the NHS refuse to assist with skin removal, thereby giving you a body to be proud of  
9 instead of a grotesque thing to hide, which will inevitably be refilled

10 Do you know what services are available to support weight loss?

11 The type weight-loss programme that is suitable dependent upon size, age and physical health presentation. To reduce potential risk of injury, stroke or heart attack

12 Are researches into obesity funded by government?

13 Who should help patients lose weight? What is the evidence that things such as MECC actually works? Or should we leave it to professionals with obesity treatment  
14 experience?

15 The cost to the NHS for adapting specialist equipment

16 What kind of help do you feel that the NHS could provide?

17 How do you feel about your weight?

18 Crisps or not?

19 Have you drunk any fruit juices?

20 What is the truth about milk?

21 Butter and full fat milk ?

---

22 **Ambiguous (N=5)**

23 Re-formulate how weight with other factors is 'healthy' and 'unhealthy'

24 Can we identify at an individual level what rate of weight loss is optimal to avoid harmful complications such as excess skin, gallstones etc

25 How and best to support our most difficult patients

26 Success rate for each procedure

27 healthy lifestyle initiatives at Primary Care level

---

28 **Not relevant (N=13)**

29 How strong/reproducible is that evidence?

30 How can guidelines best communicate uncertainty and variability to the public?

31 What is the impact on the offspring of mum having hyperglycaemia in pregnancy?

32 Is the DASH diet effective in reducing the risk of preeclampsia in those with gestational hypertension?

1 Impact of changes in ingredients and preparation methods on the nutritional quality of food consumed.

2 Is our food poisonous to us?

3 We need more research into how counselling can help identify new strategies to reduce emotional (non) eating.

4 Eating Disorders e.g. anorexia can be devastating for those affected, and those who surround them - more research to alleviate needed

5 Is it more likely to suffer from an eating disorder if you've had a life saving procedure?

6 Is veganism a form of eating disorder?

7 Understanding the underlying psychological and physiological mechanisms of eating disorders

8 How do you feel about your body?

9 How can eating disorders affect the absorption of anti-rejection medication?

10 **Too broad scope / not empirically answerable (N=26)**

---

11 What foods should you regularly eat?

12 What is the healthiest diet

13 How can we ensure more people (incl. children) consume a high-quality diet (vegetables, fruits, beans, etc)? Why? National and international survey data suggest  
14 that people have suboptimal diets.

15 Diet

16 Any new guidance and tips

17 What are the most common misconceptions about dieting and weight-loss?

18 What can / is being done to tackle the sheer amount of fake news, fads and terrible advice when it comes to nutrition and diets.

19 How can we educate people and get support from the food industry to get more info about the right food.

20 How do dietary patterns and food choices based on environmental and sustainability concerns influence weight status in young people?

21 How to prevent the escalation in childhood obesity in low and middle income countries

22 What lessons that we have learnt in the UK can be communicated and employed in "developing" countries where the next epidemics of obesity are happening?

23 What can we learn from the obesity problem in developed countries that can help prevent the same problems in the developing world?

24 What foods actually contribute to increased weight and obesity ?

25 What foods do you blame for your obesity?

26 What food can help break down fat?

27 Health

28 understanding the obesity paradox in health of certain patient groups and older patients . Is intentional weight loss always beneficial for health

29 Type2 Diabetes is common in older adults. How can this be avoided?

30 what food to eat

31 Using systems dynamics modelling techniques, what are the optimal intervention points on the Foresight Obesity Map?

32 What research is there into the link between post transplantation patients and anorexia?



1 How to eat sustainably?

2 Exercise

3 More active and healthy

4 Health

5 Increasing Age and weight [impact on NHS]

---

6 **Opinion based (N=19)**

---

8 Is weight the best proxy for the health impact of weight management programmes?

9 What is your average daily/weekly calorie intake (intake recorded)

10 Why calory restriction diets do not work?

11 What do you eat?

12 What do you normally eat and drink on a daily basis?

13 Am I on a healthy diet?

14 Do you know what balance diet is and do you think you have one?

15 What has/has not worked for you previously?

16 How much research is being done on the subject of nutrition?

17 Why isn't there a fast food chain that just do healthy food?

18 Is government nutritional advice wrong

19 How sure can I be that things like 'five a day' and alcohol units are based on solid findings and not just arbitrary figures in the general direction of better health.

20 Why are the most effective treatment for obesity (bariatric surgery) is underutilised in the UK?

21 When will a true multidisciplinary treatment be available, especially with psychological / psychiatric treatment, for patients with obesity?

22 Adjusting mental attitude needed to achieve weight loss.

23 is there a way we can be tested to find out what foods are best suited to our metabolism

24 Do you personally think obesity is a health issue?

25 Am I taking enough exercise

26 I have a sweet tooth and throughout the day, I usually consume three to four chunks of sweetmeat or chocolates. Will that increase my chances of obesity definitely or just a probability?

---

27 **Other (N=10)**

---

28 How can natural experiments be best used to evaluate the potential of obesity interventions? (methodological)

29 I imagine that other studies have been conducted on this topic. Will data from these studies be taken into consideration, along with your own (comment)

30 How can governments be influenced to adopt preventive health measures around obesity rather than focus on treatment? (policy/ implementation)

31 Obesity prevention at the population level: where does political appetite align with evidence? (policy/ implementation)

32

33

34

35

36

37

38

39

40

41

42

43

44

45

46

1 How can we speed up translation of promising findings from early trials on how to prevent or treat obesity to the real world? What sources of funding or NHS  
2 'pipelines' would help? Could money from the sugar tax or similar be used for this? (about dissemination)  
3 What factors/ characteristics are shared by people who love being active and how does these characters differ from those who hate activity?  
4 Does malnutrition (diet of poor nutritional value) increase the risk of obesity  
5 What food combinations best help you to lose weight?  
6 Successful interventions for disorders which lead to weight loss  
7 Is there as much time/money spent on obesity-related diseases as those related to being severely underweight?  
8  
9

---

10  
11  
12  
13  
14  
15  
16  
17  
18  
19  
20  
21  
22  
23  
24  
25  
26  
27  
28  
29  
30  
31  
32  
33  
34  
35  
36  
37  
38  
39  
40  
41  
42  
43  
44  
45  
46

For peer review only

**Supplementary Table 3: The rephrased research questions**

| Rephrased question(s)                                                                                                                                                                                                                                                                                                                                                                                                                                                                                                        |
|------------------------------------------------------------------------------------------------------------------------------------------------------------------------------------------------------------------------------------------------------------------------------------------------------------------------------------------------------------------------------------------------------------------------------------------------------------------------------------------------------------------------------|
| 1. How do genetic factors, physiological and metabolic processes affect weight status, weight gain and regional fat distribution? What are the mechanisms involved? Do these factors affect the ability to lose and maintain body weight? Do weight loss programmes tailored to a person's genetic makeup or physiology produce greater weight loss than untailored programmes?                                                                                                                                              |
| 2. How do genetic factors, physiological and metabolic processes affect weight status, weight gain and regional fat distribution? What are the mechanisms involved? Do these factors affect the ability to lose and maintain body weight? Do weight loss programmes tailored to a person's genetic makeup or physiology produce greater weight loss than untailored programmes?                                                                                                                                              |
| 3. How do genetic factors, physiological and metabolic processes affect weight status, weight gain and regional fat distribution? What are the mechanisms involved? Do these factors affect the ability to lose and maintain body weight? Do weight loss programmes tailored to a person's genetic makeup or physiology produce greater weight loss than untailored programmes?                                                                                                                                              |
| 4. How do demographic, social and cultural factors, e.g. age, socioeconomic status (SES), lifestyle, environment, psychosocial functioning affect weight status, weight gain and regional fat distribution? What are the mechanisms involved? Does the effectiveness of weight loss methods depend on social and cultural background and, if so, can the effects be made more equitable? Are weight loss methods tailored to people's background more effective for weight loss and weight maintenance than general methods? |
| 5. Does having a choice of how to lose weight improve the success of the weight loss attempt?                                                                                                                                                                                                                                                                                                                                                                                                                                |
| 6. Does the age at which people become overweight influence person's ability to lose weight later in life?                                                                                                                                                                                                                                                                                                                                                                                                                   |
| 7. What are the most effective methods for weight loss? What are the effective components of treatments/ programmes incorporating a behavioural element? How many and in what combination are most effective? What is the optimal duration of these programmes?                                                                                                                                                                                                                                                              |
| 8. Why do some people struggle to maintain motivation during a weight loss attempt?                                                                                                                                                                                                                                                                                                                                                                                                                                          |
| 9. Does the mode of delivery e.g. in-person face-to-face, group, digital, telephone influence the weight loss achieved by a weight loss programme?                                                                                                                                                                                                                                                                                                                                                                           |
| 10. Does an intervention that focuses on improving overall health rather than a specific focus on weight loss improve health and wellbeing?                                                                                                                                                                                                                                                                                                                                                                                  |
| 11. What is the role of social networks in weight loss? Does having a weight loss buddy lead to better outcomes?                                                                                                                                                                                                                                                                                                                                                                                                             |
| 12. Do social prescribing schemes such as community gardening, cookery classes, choir, lunch club, or book clubs lead to greater weight loss when trying to lose weight than attempting weight loss without such prescription?                                                                                                                                                                                                                                                                                               |
| 13. Does endorsement or delivery of interventions by different credible sources enhance the effectiveness of weight loss interventions? E.g. GP referral, celebrity endorsements, social media, family and friends. Does measurement and acknowledgement of BMI by a credible source influence motivation to attempt weight loss or adherence to weight loss programme?                                                                                                                                                      |

|    |                                                                                                                                                                                                                                                                                                                                                                 |
|----|-----------------------------------------------------------------------------------------------------------------------------------------------------------------------------------------------------------------------------------------------------------------------------------------------------------------------------------------------------------------|
| 1  | 14. Does effectiveness of weight loss interventions vary depending on weight status of the individual delivering the intervention?                                                                                                                                                                                                                              |
| 2  | 15. Can interventions modify individuals' food preferences and does this affect weight outcomes?                                                                                                                                                                                                                                                                |
| 3  | 16. How effective and cost effective are subsidies for healthy food or access to leisure facilities to prevent or treat obesity?                                                                                                                                                                                                                                |
| 4  | 17. Do interventions that target the obesogenic environment such as urban planning, placement of fast food outlets and workplace policies affect population mean weight and do these effects differ by baseline weight status (underweight, healthy weight, overweight, obesity)? Which interventions are most effective at reaching low socio-economic groups? |
| 5  | 18. What is the most effective and cost effective mix of population/ public health and individual interventions to tackle obesity?                                                                                                                                                                                                                              |
| 6  | 19. Can screening programs identify those at risk of developing obesity? Does identifying people at risk and implementing early interventions prevent weight gain?                                                                                                                                                                                              |
| 7  | 20. Do interventions to encourage healthier food purchasing affect population mean weight or the prevalence of overweight and obesity?                                                                                                                                                                                                                          |
| 8  | 21. Does fast food advertising affect the prevalence of obesity in childhood?                                                                                                                                                                                                                                                                                   |
| 9  | 22. Is taxing unhealthy foods and drink effective in reducing the prevalence of overweight and obesity?                                                                                                                                                                                                                                                         |
| 10 | 23. Would rules that limit the energy or macronutrient content of certain categories of food products affect the prevalence of overweight and obesity?                                                                                                                                                                                                          |
| 11 | 24. How does imprisonment effect body weight? What factors influence weight change and obesity during imprisonment?                                                                                                                                                                                                                                             |
| 12 | 25. Do interventions, including clinical follow-up, after bariatric surgery prevent weight regain?                                                                                                                                                                                                                                                              |
| 13 | 26. What are the adverse consequences of bariatric surgery and can these be predicted?                                                                                                                                                                                                                                                                          |
| 14 | 27. What are the psychosocial consequences of bariatric surgery for example, on intimate relationships and eating disorders, and do these vary by social and cultural group?                                                                                                                                                                                    |
| 15 | 28. Why do people with severe obesity eligible for surgery decide not to proceed with the surgery and do they take up other interventions?                                                                                                                                                                                                                      |
| 16 | 29. Are workplace interventions to support active commuting, or schemes to increase physical activity provided through workplaces feasible, acceptable, and do they affect weight?                                                                                                                                                                              |
| 17 | 30. Is it better to advise incorporating physical activity into daily life or taking formal exercise to increase overall levels of physical activity in the population?                                                                                                                                                                                         |
| 18 | 31. Why do some people with overweight and obesity do insufficient physical activity and what advice or interventions might increase this?                                                                                                                                                                                                                      |
| 19 | 32. How does people's perception of air quality affect their engagement in outdoor physical activity and does this influence their weight?                                                                                                                                                                                                                      |
| 20 | 33. Is obesity a cause or a consequence of reduced physical activity?                                                                                                                                                                                                                                                                                           |
| 21 | 34. What are the most accurate and practical ways to measure total energy expenditure                                                                                                                                                                                                                                                                           |
| 22 | 35. What are the most accurate and practical ways to measure physical activity?                                                                                                                                                                                                                                                                                 |

|    |     |                                                                                                                                                                                                                                                                                                                                                                                                                                                                                                                                                                     |
|----|-----|---------------------------------------------------------------------------------------------------------------------------------------------------------------------------------------------------------------------------------------------------------------------------------------------------------------------------------------------------------------------------------------------------------------------------------------------------------------------------------------------------------------------------------------------------------------------|
| 1  | 36. | Does incorporating physical activity into weight loss interventions enhance weight loss? Does this depend upon the type of physical activity (e.g. high vs low intensity, resistance vs cardiorespiratory activity)                                                                                                                                                                                                                                                                                                                                                 |
| 2  |     |                                                                                                                                                                                                                                                                                                                                                                                                                                                                                                                                                                     |
| 3  | 37. | Does being physically active mitigate the health consequences of overweight/obesity?                                                                                                                                                                                                                                                                                                                                                                                                                                                                                |
| 4  |     |                                                                                                                                                                                                                                                                                                                                                                                                                                                                                                                                                                     |
| 5  | 38. | What are the effects on health of having a BMI within the overweight/obese range yet with high proportion of lean tissue/high muscle mass)?                                                                                                                                                                                                                                                                                                                                                                                                                         |
| 6  |     |                                                                                                                                                                                                                                                                                                                                                                                                                                                                                                                                                                     |
| 7  | 39. | Do interventions in primary care prevent obesity? What are the effects of offering weight management referrals on the prevalence of obesity?                                                                                                                                                                                                                                                                                                                                                                                                                        |
| 8  |     |                                                                                                                                                                                                                                                                                                                                                                                                                                                                                                                                                                     |
| 9  | 40. | What are the effects of tier 3 services on weight loss and are these services cost-effective?                                                                                                                                                                                                                                                                                                                                                                                                                                                                       |
| 10 |     |                                                                                                                                                                                                                                                                                                                                                                                                                                                                                                                                                                     |
| 11 | 41. | How accurate are existing models of the health consequences of excess weight and the impact of weight loss? Which assumptions are critical in determining the long-term effectiveness and cost-effectiveness of weight loss interventions? What do these models predict is the impact of weight loss interventions on health and disease incidence and the cost-effectiveness of such interventions? What is the impact of weight regain on the incidence of disease and cost-effectiveness of weight loss interventions?                                           |
| 12 |     |                                                                                                                                                                                                                                                                                                                                                                                                                                                                                                                                                                     |
| 13 |     |                                                                                                                                                                                                                                                                                                                                                                                                                                                                                                                                                                     |
| 14 |     |                                                                                                                                                                                                                                                                                                                                                                                                                                                                                                                                                                     |
| 15 | 42. | Are there long-term health benefits from short-term weight loss? If so, is there a minimum amount of weight loss / duration that has clear benefits?                                                                                                                                                                                                                                                                                                                                                                                                                |
| 16 |     |                                                                                                                                                                                                                                                                                                                                                                                                                                                                                                                                                                     |
| 17 | 43. | What are the effects of interventions to influence health professionals to support patients with overweight and obesity?                                                                                                                                                                                                                                                                                                                                                                                                                                            |
| 18 |     |                                                                                                                                                                                                                                                                                                                                                                                                                                                                                                                                                                     |
| 19 | 44. | Do weight loss interventions improve glycaemic control or influence cardiovascular risk in people with type 1 diabetes and obesity and what are the adverse effects?                                                                                                                                                                                                                                                                                                                                                                                                |
| 20 |     |                                                                                                                                                                                                                                                                                                                                                                                                                                                                                                                                                                     |
| 21 | 45. | What is the effectiveness and cost-effectiveness of bariatric surgery for people with type 1 and type 2 diabetes with any degree of overweight but with a BMI<35?                                                                                                                                                                                                                                                                                                                                                                                                   |
| 22 |     |                                                                                                                                                                                                                                                                                                                                                                                                                                                                                                                                                                     |
| 23 | 46. | How effective are emerging pharmacological treatments for weight loss and how can we develop new drug treatments to help people lose weight (e.g. appetite suppressants, nutrient absorption etc)?                                                                                                                                                                                                                                                                                                                                                                  |
| 24 |     |                                                                                                                                                                                                                                                                                                                                                                                                                                                                                                                                                                     |
| 25 | 47. | Are there methods to combine pharmacological and behavioural weight loss treatments that mean the combination is greater than the sum of the parts?                                                                                                                                                                                                                                                                                                                                                                                                                 |
| 26 |     |                                                                                                                                                                                                                                                                                                                                                                                                                                                                                                                                                                     |
| 27 | 48. | What are the advantages and disadvantages of the various methods of quantifying body fat in routine healthcare? What is the association between these measures and risk of obesity-related health outcomes? What are the most appropriate classifications for overweight and obesity in different demographic groups, e.g. ethnicity, age, gender? Can we develop an easy and accessible proxy measurement for 'Thin on Outside, Fat on Inside'? What is the association between being "fat on the outside, thin on the inside" and other obesity related outcomes? |
| 28 |     |                                                                                                                                                                                                                                                                                                                                                                                                                                                                                                                                                                     |
| 29 |     |                                                                                                                                                                                                                                                                                                                                                                                                                                                                                                                                                                     |
| 30 |     |                                                                                                                                                                                                                                                                                                                                                                                                                                                                                                                                                                     |
| 31 | 49. | What is the association between clothing size and BMI?                                                                                                                                                                                                                                                                                                                                                                                                                                                                                                              |
| 32 |     |                                                                                                                                                                                                                                                                                                                                                                                                                                                                                                                                                                     |
| 33 | 50. | What is the effect of behavioural, dietary, pharmacological, and surgical interventions on body composition and fat distribution? Can exercise attenuate loss of lean tissue associated with weight loss?                                                                                                                                                                                                                                                                                                                                                           |
| 34 |     |                                                                                                                                                                                                                                                                                                                                                                                                                                                                                                                                                                     |
| 35 | 51. | What are the methods available to measure adiposity in children? How valid and reliable are these methods?                                                                                                                                                                                                                                                                                                                                                                                                                                                          |
| 36 |     |                                                                                                                                                                                                                                                                                                                                                                                                                                                                                                                                                                     |
| 37 | 52. | What is the cost and affordability of a healthy balanced diet? How can we make healthier foods more affordable? How can we improve access to healthy diets for social and cultural groups, such as people in poverty, people in inner cities, or young and older people?                                                                                                                                                                                                                                                                                            |
| 38 |     |                                                                                                                                                                                                                                                                                                                                                                                                                                                                                                                                                                     |
| 39 |     |                                                                                                                                                                                                                                                                                                                                                                                                                                                                                                                                                                     |
| 40 | 53. | Does the amount of sugar in baby food affect children's weight gain?                                                                                                                                                                                                                                                                                                                                                                                                                                                                                                |
| 41 |     |                                                                                                                                                                                                                                                                                                                                                                                                                                                                                                                                                                     |
| 42 |     |                                                                                                                                                                                                                                                                                                                                                                                                                                                                                                                                                                     |
| 43 |     |                                                                                                                                                                                                                                                                                                                                                                                                                                                                                                                                                                     |
| 44 |     |                                                                                                                                                                                                                                                                                                                                                                                                                                                                                                                                                                     |
| 45 |     |                                                                                                                                                                                                                                                                                                                                                                                                                                                                                                                                                                     |
| 46 |     |                                                                                                                                                                                                                                                                                                                                                                                                                                                                                                                                                                     |

- 1  
2  
3  
4  
5  
6  
7  
8  
9  
10  
11  
12  
13  
14  
15  
16  
17  
18  
19  
20  
21  
22  
23  
24  
25  
26  
27  
28  
29  
30  
31  
32  
33  
34  
35  
36  
37  
38  
39  
40  
41  
42  
43  
44  
45  
46
- |     |                                                                                                                                                                                                                                                                                                                                                                                        |
|-----|----------------------------------------------------------------------------------------------------------------------------------------------------------------------------------------------------------------------------------------------------------------------------------------------------------------------------------------------------------------------------------------|
| 54. | What changes in supermarkets or the wider food industry are effective in promoting healthier diets? Does changing labelling and/ or packaging affect purchasing, consumption and body weight?                                                                                                                                                                                          |
| 55. | Does social influence affect the amount of energy dense, highly palatable foods or consumption of healthier foods and can these norms be changed?                                                                                                                                                                                                                                      |
| 56. | What is the impact of reducing the availability of energy dense foods on overall energy intake?                                                                                                                                                                                                                                                                                        |
| 57. | How effective are interventions to reduce portions in restaurants, café/ food outlets on energy intake and the prevalence of overweight and obesity?                                                                                                                                                                                                                                   |
| 58. | Do food additives and non-nutritive sweeteners affect appetite regulation, post prandial metabolic and endocrine responses, energy intake? Is replacing sugar with non-nutritive sweeteners an effect method of weight loss and weight maintenance?                                                                                                                                    |
| 59. | Do specialty foods including genetically modified and organic foods influence total energy intake and hence bodyweight?                                                                                                                                                                                                                                                                |
| 60. | Do vitamin and mineral deficiencies cause or contribute to weight gain? Do nutritional supplements aid weight loss?                                                                                                                                                                                                                                                                    |
| 61. | How do diets with varying macronutrient composition affect adherence to energy restriction?                                                                                                                                                                                                                                                                                            |
| 62. | Does the low carbohydrate ketogenic diet cause greater weight loss than a reduced carbohydrate non-ketogenic diet? Is attempting to follow a ketogenic or reduced carbohydrate diet safe and effective for weight loss and weight loss maintenance? What are the effects on fat distribution/body composition of these diets? Are there any adverse effects or long-term health risks? |
| 63. | Do diets high in fat or high in sugar increase the likelihood of gaining weight?                                                                                                                                                                                                                                                                                                       |
| 64. | Does eating a diet high in processed food make losing weight, maintaining lost weight, or gaining weight more likely? Do diets high in processed food lead to a higher incidence of weight-related illness, such as diabetes or heart disease, independent of body weight status?                                                                                                      |
| 65. | Is a vegan, vegetarian diet, pescatarian diet or a diet inclusive of meat better for weight loss, weight maintenance and metabolic health?                                                                                                                                                                                                                                             |
| 66. | Are high protein diets safe and effective for weight loss and weight loss maintenance?                                                                                                                                                                                                                                                                                                 |
| 67. | Are total diet replacement programmes (based on energy restricted formula food products) effective, safe, and tolerable for weight management in special populations e.g. attenuation of weight gain in pregnant women or for other groups where rapid weight loss may change outcomes, such as prior to a planned surgery?                                                            |
| 68. | Are total diet replacement programmes with behavioural support as effective as using diet replacement products without behavioural support?                                                                                                                                                                                                                                            |
| 69. | Does attempting to limit alcohol intake reduce the risk of weight gain or increase weight loss?                                                                                                                                                                                                                                                                                        |
| 70. | Is limiting daily energy intake a more successful method than limiting daily carbohydrate intake for weight loss and weight maintenance?                                                                                                                                                                                                                                               |
| 71. | Is training people to eat less through techniques such as mindfulness or slow eating, or responding to internal hunger and thirst cues effective in helping people lose weight?                                                                                                                                                                                                        |
| 72. | What is the prevalence of disordered eating in people with obesity? Do weight loss interventions increase the risk of disordered eating?                                                                                                                                                                                                                                               |
| 73. | How can we accurately assess the amount we eat in terms of calories based on an individual person's needs?                                                                                                                                                                                                                                                                             |

|    |     |                                                                                                                                                                                                                                                                                                                                                                                                                                                                                                                                                          |
|----|-----|----------------------------------------------------------------------------------------------------------------------------------------------------------------------------------------------------------------------------------------------------------------------------------------------------------------------------------------------------------------------------------------------------------------------------------------------------------------------------------------------------------------------------------------------------------|
| 1  | 74. | Do restrictive or permissive diets lead to greater weight loss or weight loss maintenance? Is permissive messaging about dietary change more effective at maintaining a healthy weight than restrictive messaging? (Restrictive diets mean adhering to rules that limit or exclude certain types of foods, times to eat, or the amount eaten on any day. Permissive diets have no rules on particular types and amounts of foods eaten but people adhering to this diet still aim to limit overall energy intake).                                       |
| 2  |     |                                                                                                                                                                                                                                                                                                                                                                                                                                                                                                                                                          |
| 3  |     |                                                                                                                                                                                                                                                                                                                                                                                                                                                                                                                                                          |
| 4  | 75. | Is attempting to follow intermittent fasting (including 5:2, every other day diet, etc.) or time restricted eating (e.g. 16:8 or eating between specific hours of the day) effective for weight loss and weight maintenance? Is intermittent fasting or time restricted eating more effective than calorie restriction alone? Are the benefits from intermittent fasting or time restricted eating (e.g. metabolic health) independent from weight loss? Are there any side effects or health risks from intermittent fasting or time restricted eating? |
| 5  |     |                                                                                                                                                                                                                                                                                                                                                                                                                                                                                                                                                          |
| 6  |     |                                                                                                                                                                                                                                                                                                                                                                                                                                                                                                                                                          |
| 7  |     |                                                                                                                                                                                                                                                                                                                                                                                                                                                                                                                                                          |
| 8  |     |                                                                                                                                                                                                                                                                                                                                                                                                                                                                                                                                                          |
| 9  | 76. | Does advice to omit breakfast lead to greater weight loss and better weight maintenance than advice to eat breakfast?                                                                                                                                                                                                                                                                                                                                                                                                                                    |
| 10 |     |                                                                                                                                                                                                                                                                                                                                                                                                                                                                                                                                                          |
| 11 | 77. | What effect do working hours (e.g. shift work) and/ or a late eating pattern have on body weight and adiposity?                                                                                                                                                                                                                                                                                                                                                                                                                                          |
| 12 |     |                                                                                                                                                                                                                                                                                                                                                                                                                                                                                                                                                          |
| 13 | 78. | Is attempting to avoid snacking more or less effective than 'little and often' for weight loss and weight maintenance?                                                                                                                                                                                                                                                                                                                                                                                                                                   |
| 14 |     |                                                                                                                                                                                                                                                                                                                                                                                                                                                                                                                                                          |
| 15 | 79. | Are there benefits of some types of diets on diabetes that are independent of the amount of weight lost?                                                                                                                                                                                                                                                                                                                                                                                                                                                 |
| 16 |     |                                                                                                                                                                                                                                                                                                                                                                                                                                                                                                                                                          |
| 17 | 80. | Do markers of glycaemic control and cardiovascular disease (disease (e.g. insulin, glucagon, HBA1C, blood pressure, cholesterol etc) predict weight gain and obesity?                                                                                                                                                                                                                                                                                                                                                                                    |
| 18 |     |                                                                                                                                                                                                                                                                                                                                                                                                                                                                                                                                                          |
| 19 | 81. | What effect do these markers have on weight loss and weight maintenance?                                                                                                                                                                                                                                                                                                                                                                                                                                                                                 |
| 20 |     |                                                                                                                                                                                                                                                                                                                                                                                                                                                                                                                                                          |
| 21 | 82. | What is the role of the adipocyte life cycle in body weight and obesity?                                                                                                                                                                                                                                                                                                                                                                                                                                                                                 |
| 22 |     |                                                                                                                                                                                                                                                                                                                                                                                                                                                                                                                                                          |
| 23 | 83. | Has the fat distribution in females changed over time?                                                                                                                                                                                                                                                                                                                                                                                                                                                                                                   |
| 24 |     |                                                                                                                                                                                                                                                                                                                                                                                                                                                                                                                                                          |
| 25 | 84. | What are the drivers of food choice, appetite, and intake and do variations in these drives explain who develops obesity and who does not?                                                                                                                                                                                                                                                                                                                                                                                                               |
| 26 |     |                                                                                                                                                                                                                                                                                                                                                                                                                                                                                                                                                          |
| 27 | 85. | Is it possible suppress appetite and so reduce energy intake? What are the effects of any methods that achieve this?                                                                                                                                                                                                                                                                                                                                                                                                                                     |
| 28 |     |                                                                                                                                                                                                                                                                                                                                                                                                                                                                                                                                                          |
| 29 | 86. | What is the relationship between emotions and appetite and energy intake?                                                                                                                                                                                                                                                                                                                                                                                                                                                                                |
| 30 |     |                                                                                                                                                                                                                                                                                                                                                                                                                                                                                                                                                          |
| 31 | 87. | What are the mechanisms that lead to satiation during meals?                                                                                                                                                                                                                                                                                                                                                                                                                                                                                             |
| 32 |     |                                                                                                                                                                                                                                                                                                                                                                                                                                                                                                                                                          |
| 33 | 88. | Does the quality or amount of sleep influence bodyweight? Do interventions that increase/ decrease sleep affect weight loss and weight maintenance?                                                                                                                                                                                                                                                                                                                                                                                                      |
| 34 |     |                                                                                                                                                                                                                                                                                                                                                                                                                                                                                                                                                          |
| 35 | 89. | How does the brain control food intake and can we use these mechanism to aid weight loss? What are the brain responses (neural correlates) in response to food during weight loss and following weight regain?                                                                                                                                                                                                                                                                                                                                           |
| 36 |     |                                                                                                                                                                                                                                                                                                                                                                                                                                                                                                                                                          |
| 37 | 90. | Does autism increase the risk of obesity?                                                                                                                                                                                                                                                                                                                                                                                                                                                                                                                |
| 38 |     |                                                                                                                                                                                                                                                                                                                                                                                                                                                                                                                                                          |
| 39 | 91. | Does variation in gastric capacity explain who does and does not develop obesity?                                                                                                                                                                                                                                                                                                                                                                                                                                                                        |
| 40 |     |                                                                                                                                                                                                                                                                                                                                                                                                                                                                                                                                                          |
| 41 | 92. | How do energy requirements change following weight loss and what are the mechanisms involved?                                                                                                                                                                                                                                                                                                                                                                                                                                                            |
| 42 |     |                                                                                                                                                                                                                                                                                                                                                                                                                                                                                                                                                          |
| 43 | 93. | How do we assess cardiovascular risk in people with overweight and obesity? Should we stratify interventions for weight loss based on cardiovascular risk in those living with overweight and obesity?                                                                                                                                                                                                                                                                                                                                                   |
| 44 |     |                                                                                                                                                                                                                                                                                                                                                                                                                                                                                                                                                          |
| 45 |     |                                                                                                                                                                                                                                                                                                                                                                                                                                                                                                                                                          |
| 46 |     |                                                                                                                                                                                                                                                                                                                                                                                                                                                                                                                                                          |

|    |                                                                                                                                                                                                                                                                                                                                                                                                                          |
|----|--------------------------------------------------------------------------------------------------------------------------------------------------------------------------------------------------------------------------------------------------------------------------------------------------------------------------------------------------------------------------------------------------------------------------|
| 1  | 94. Does the gut microbiome have an effect on weight gain and obesity, adiposity, body shape and composition? Do human genetics influence the gut microbiome? Can a change in gut microbiome aid weight loss and by what mechanisms? Which strains of bacteria are associated with greatest weight loss during a weight loss attempt? What is the effect of prebiotics or probiotics on weight loss/ weight maintenance? |
| 2  |                                                                                                                                                                                                                                                                                                                                                                                                                          |
| 3  |                                                                                                                                                                                                                                                                                                                                                                                                                          |
| 4  | 95. Does obesity cause dementia?                                                                                                                                                                                                                                                                                                                                                                                         |
| 5  |                                                                                                                                                                                                                                                                                                                                                                                                                          |
| 6  | 96. Is the use of commonly prescribed medications (e.g. antibiotics, pain medication) related to weight gain and obesity? What are the effective methods to prevent weight gain and achieve weight loss in people taking medications known to cause weight gain?                                                                                                                                                         |
| 7  |                                                                                                                                                                                                                                                                                                                                                                                                                          |
| 8  |                                                                                                                                                                                                                                                                                                                                                                                                                          |
| 9  | 97. What medical conditions can lead to weight gain and obesity?                                                                                                                                                                                                                                                                                                                                                         |
| 10 |                                                                                                                                                                                                                                                                                                                                                                                                                          |
| 11 | 98. Is weight loss an effective treatment for certain medical conditions and chronic illnesses, e.g. PCOS, hypothyroidism, lipoedema, gastrointestinal conditions, heart failure, osteoarthritis, chronic pain etc? Should specific weight loss methods be recommended for people with overweight and obesity with certain medical conditions and chronic illnesses?                                                     |
| 12 |                                                                                                                                                                                                                                                                                                                                                                                                                          |
| 13 |                                                                                                                                                                                                                                                                                                                                                                                                                          |
| 14 | 99. In people with obesity, does losing weight affect cardiac function?                                                                                                                                                                                                                                                                                                                                                  |
| 15 |                                                                                                                                                                                                                                                                                                                                                                                                                          |
| 16 | 100. In people with overweight and type 2 diabetes, does losing weight lead to remission (no longer having diabetes) and how long does remission last? What health checks are needed for people who have achieved diabetes remission?                                                                                                                                                                                    |
| 17 |                                                                                                                                                                                                                                                                                                                                                                                                                          |
| 18 |                                                                                                                                                                                                                                                                                                                                                                                                                          |
| 19 | 101. Does the macronutrient composition of the diet influence the progression of non-alcoholic fatty liver disease (NAFLD) in people with obesity? NAFLD means a build-up of fat in the liver that can lead to inflammation, scarring, and liver failure.                                                                                                                                                                |
| 20 |                                                                                                                                                                                                                                                                                                                                                                                                                          |
| 21 |                                                                                                                                                                                                                                                                                                                                                                                                                          |
| 22 | 102. Does informing a person with overweight or obesity that she or he has NAFLD motivate weight loss?                                                                                                                                                                                                                                                                                                                   |
| 23 |                                                                                                                                                                                                                                                                                                                                                                                                                          |
| 24 | 103. Does having a liver transplant in childhood or adolescence lead to unhealthy weight gain?                                                                                                                                                                                                                                                                                                                           |
| 25 |                                                                                                                                                                                                                                                                                                                                                                                                                          |
| 26 | 104. Are people with obesity at higher risk of infectious diseases? Are they at higher risk of severe consequences from these diseases? What are the proposed mechanisms?                                                                                                                                                                                                                                                |
| 27 |                                                                                                                                                                                                                                                                                                                                                                                                                          |
| 28 | 105. Does pseudo gynaecomastia in men with obesity influence psychological wellbeing?                                                                                                                                                                                                                                                                                                                                    |
| 29 |                                                                                                                                                                                                                                                                                                                                                                                                                          |
| 30 | 106. Does having obesity affect quality of life? Does losing weight or gaining weight affect quality of life in people living with overweight and obesity?                                                                                                                                                                                                                                                               |
| 31 |                                                                                                                                                                                                                                                                                                                                                                                                                          |
| 32 | 107. What impact does obesity have on life opportunities? E.g. employment, marital status, happiness, education.                                                                                                                                                                                                                                                                                                         |
| 33 |                                                                                                                                                                                                                                                                                                                                                                                                                          |
| 34 | 108. Does losing weight and regaining it repeatedly adversely affect long-term health or psychological wellbeing compared with staying at a higher weight the whole time?                                                                                                                                                                                                                                                |
| 35 |                                                                                                                                                                                                                                                                                                                                                                                                                          |
| 36 | 109. What are the health risks of individuals who have previously been overweight but now lost weight compared with those who have never been overweight or obese?                                                                                                                                                                                                                                                       |
| 37 |                                                                                                                                                                                                                                                                                                                                                                                                                          |
| 38 | 110. Does the menopause cause weight gain/loss? Does the age at menopause affect weight gain and weight loss?                                                                                                                                                                                                                                                                                                            |
| 39 |                                                                                                                                                                                                                                                                                                                                                                                                                          |
| 40 | 111. Does having heavy or irregular periods affect bodyweight?                                                                                                                                                                                                                                                                                                                                                           |
| 41 |                                                                                                                                                                                                                                                                                                                                                                                                                          |
| 42 |                                                                                                                                                                                                                                                                                                                                                                                                                          |
| 43 |                                                                                                                                                                                                                                                                                                                                                                                                                          |
| 44 |                                                                                                                                                                                                                                                                                                                                                                                                                          |
| 45 |                                                                                                                                                                                                                                                                                                                                                                                                                          |
| 46 |                                                                                                                                                                                                                                                                                                                                                                                                                          |



1  
2  
3  
4  
5  
6  
7  
8  
9  
10  
11  
12  
13  
14  
15  
16  
17  
18  
19  
20  
21  
22  
23  
24  
25  
26  
27  
28  
29  
30  
31  
32  
33  
34  
35  
36  
37  
38  
39  
40  
41  
42  
43  
44  
45  
46

|      |                                                                                                                                                                                                                                                                               |
|------|-------------------------------------------------------------------------------------------------------------------------------------------------------------------------------------------------------------------------------------------------------------------------------|
| 112. | Does the level of naturally occurring sex hormones (testosterone, oestrogen, progesterone) influence bodyweight? Does administering sex hormones lead to weight loss or weight loss maintenance, e.g. HRT, testosterone etc.?                                                 |
| 113. | In women entering pregnancy with overweight or obesity, does intentional efforts to reduce the amount of weight gained reduce the risk of obesity in the offspring?                                                                                                           |
| 114. | Are interventions aimed at weight control effective in helping women entering pregnancy with overweight or obesity limit weight gain during pregnancy or lose weight after birth?                                                                                             |
| 115. | How can breastfeeding help with postpartum weight management, both in terms of energy expenditure and energy balance?                                                                                                                                                         |
| 116. | Do interventions (e.g. nutrition education and physical activity) in pre-school, primary school and secondary school reduce children's risk of unhealthy weight gain and, if so, how do they act? Does the effect of such interventions differ by social and cultural groups? |
| 117. | Do parents' attitudes to food influence their children's food intake and risk of obesity?                                                                                                                                                                                     |
| 118. | Has the National Childhood Measurement Programme had an effect upon weight trajectories, health care usage, and mental health of children or their parents?                                                                                                                   |
| 119. | What are the effects of obesity in childhood on outcomes other than physical health e.g. psychological wellbeing, educational achievement, employment, relationship status etc.?                                                                                              |
| 120. | Does childhood trauma or mental health disorders in childhood cause obesity?                                                                                                                                                                                                  |
| 121. | Are interventions to treat children or adolescents with severe obesity effective?                                                                                                                                                                                             |
| 122. | Can the provision of healthy school lunches reduce obesity in children?                                                                                                                                                                                                       |
| 123. | Do some parents of children with overweight or obesity not recognise that they are overweight and what effect would interventions to improve recognition have?                                                                                                                |
| 124. | What is the effect of parental support for their children's weight management on weight in a child living with obesity? Are family based interventions aiming at childhood weight control effective                                                                           |
| 125. | Do family dynamics cause unhealthy weight gain?                                                                                                                                                                                                                               |
| 126. | What methods are available to measure diet in infants, children, and adolescents and how do they compare in reliability and practicality?                                                                                                                                     |
| 127. | Do interventions in the general population to improve cookery skills improve weight management?                                                                                                                                                                               |
| 128. | Do interventions in the general population to grow food improve weight management?                                                                                                                                                                                            |
| 129. | What impact do cookery related television programmes have on the UK diet?                                                                                                                                                                                                     |
| 130. | Does the imagery used in weight loss intervention and public health messaging affect motivation for behaviour change?                                                                                                                                                         |
| 131. | Do concerns about the environment and sustainability affect weight?                                                                                                                                                                                                           |

- 1  
2  
3  
4  
5  
6  
7  
8  
9  
10  
11  
12  
13  
14  
15  
16  
17  
18  
19  
20  
21  
22  
23  
24  
25  
26  
27  
28  
29  
30  
31  
32  
33  
34  
35  
36  
37  
38  
39  
40  
41  
42  
43  
44  
45  
46
- |      |                                                                                                                                                                                                                                                                                                                                                                                                                                                 |
|------|-------------------------------------------------------------------------------------------------------------------------------------------------------------------------------------------------------------------------------------------------------------------------------------------------------------------------------------------------------------------------------------------------------------------------------------------------|
| 132. | How do the words used to define and describe overweight and obesity affect perceived discrimination as well as emotional and psychological wellbeing in people living with overweight and obesity? Would changing the language reduce the blame culture associated with obesity? What language used in public health messaging about overweight/obesity encourages weight control without increasing stigma towards people living with obesity? |
| 133. | Is there institutional bias towards people with overweight and obesity in different employment sectors and can this be changed?                                                                                                                                                                                                                                                                                                                 |
| 134. | Is there a difference in the way that health professionals respond to patients with obesity compared with people of a healthy weight in terms of investigation, diagnosis and follow up?                                                                                                                                                                                                                                                        |
| 135. | Do some people living with overweight and obesity not recognise that they are overweight and what effect would interventions to improve recognition have?                                                                                                                                                                                                                                                                                       |
| 136. | Does the fact that most people are overweight mean that people are less concerned about their own excess weight?                                                                                                                                                                                                                                                                                                                                |
| 137. | What are the effects of the body positivity movement on bodyweight?                                                                                                                                                                                                                                                                                                                                                                             |
| 138. | Do the prevailing messages about the costs of obesity on healthcare affect prevalence of obesity or bias against people with overweight?                                                                                                                                                                                                                                                                                                        |
| 139. | What effect does social media have on eating behaviours and weight control?                                                                                                                                                                                                                                                                                                                                                                     |
| 140. | What effect does social media have on self-confidence, self-esteem and self-worth of people living with overweight and obesity?                                                                                                                                                                                                                                                                                                                 |
| 141. | Does the perception that the causes of obesity relate to matters of personal responsibility motivate people to control their own weight?                                                                                                                                                                                                                                                                                                        |
| 142. | Why do some people with overweight try to lose weight and some people with overweight do not?                                                                                                                                                                                                                                                                                                                                                   |
| 143. | Does having a psychological disorder such as depression and anxiety cause weight gain, and what is the mechanism if so? How do external perceptions of weight affect mental health? What is the effect of weight loss methods and repeated dieting on mental health outcomes?                                                                                                                                                                   |
| 144. | What is the effect of adult obesity on social behaviour, self-confidence, self-esteem and self-worth?                                                                                                                                                                                                                                                                                                                                           |
| 145. | Do interventions that address emotional or social overeating lead to weight loss or weight loss maintenance?                                                                                                                                                                                                                                                                                                                                    |
| 146. | What are the most effective treatments for obesity in people with severe mental illness? Is integrating weight management into mental healthcare effective in supporting weight loss or weight loss maintenance?                                                                                                                                                                                                                                |
| 147. | Does prolonged psychological stress affect bodyweight? Do interventions that aim to reduce stress increase weight loss in people with overweight and obesity compared with interventions not addressing stress?                                                                                                                                                                                                                                 |
| 148. | Do people crave or become addicted to certain foods and, if so does this cause obesity? Can treatments reduce pica, food cravings or addiction?                                                                                                                                                                                                                                                                                                 |
| 149. | Are people with addictions to drugs and alcohol at greater risk of unhealthy weight gain?                                                                                                                                                                                                                                                                                                                                                       |
| 150. | Is overeating a form of self-harm for some people living with obesity?                                                                                                                                                                                                                                                                                                                                                                          |

**Supplementary Table 4:** Questions debated at workshop\*

| Rank | Re-phrased questions                                                                                                                                                                                                                                                                                                                                                                                                                                                                                                      | Mean score (SD) |
|------|---------------------------------------------------------------------------------------------------------------------------------------------------------------------------------------------------------------------------------------------------------------------------------------------------------------------------------------------------------------------------------------------------------------------------------------------------------------------------------------------------------------------------|-----------------|
| 1    | What are the most effective methods for weight maintenance following weight loss? What are the effective components of treatments/ programmes incorporating a behavioural element? How many and in what combination are most effective? What is the optimal duration of these programmes?                                                                                                                                                                                                                                 | 8.36 (1.87)     |
| 2    | What is the cost and affordability of a healthy balanced diet? What policy measures could make healthier foods more affordable? What policy measures could improve access to healthy diets for different social and cultural groups, such as people in poverty, people in inner cities, or young and older people?                                                                                                                                                                                                        | 7.85 (2.06)     |
| 3    | Does an intervention that focuses on improving overall health rather than a specific focus on weight loss improve health and wellbeing?                                                                                                                                                                                                                                                                                                                                                                                   | 7.81 (2.25)     |
| 4    | Does having a psychological disorder such as depression and anxiety affect weight, and, if so, what is the mechanism? How do external perceptions of weight affect mental health? What is the effect of weight loss methods and repeated dieting on mental health outcomes?                                                                                                                                                                                                                                               | 7.75 (2.03)     |
| 4    | What are the most effective methods for weight loss? What are the effective components of treatments/ programmes incorporating a behavioural element? How many and in what combination are most effective? What is the optimal duration of these programmes?                                                                                                                                                                                                                                                              | 7.75 (2.36)     |
| 6    | What is the most effective and cost effective mix of population/ public health and individual interventions to tackle obesity?                                                                                                                                                                                                                                                                                                                                                                                            | 7.72 (2.26)     |
| 7    | Do interventions (e.g. nutrition education and physical activity) in pre-school, primary school and secondary school reduce children's risk of unhealthy weight gain and, if so, how do they act? Does the effect of such interventions differ by social and cultural groups?                                                                                                                                                                                                                                             | 7.67 (2.22)     |
| 7    | What are the drivers of food choice, appetite, and intake and do variations in these drivers explain who develops obesity and who does not?                                                                                                                                                                                                                                                                                                                                                                               | 7.67 (2.24)     |
| 9    | What are the most effective ways to prompt people to make a weight loss attempt or engage with a weight loss support programme? What are the most effective methods to increase uptake and adherence to programmes?                                                                                                                                                                                                                                                                                                       | 7.65 (2.30)     |
| 10   | How do demographic, social and cultural factors, e.g. age, socioeconomic status (SES), lifestyle, environment, psychosocial functioning affect weight status, weight gain and regional fat distribution? What are the mechanisms involved? Does the effectiveness of weight loss methods depend on social and cultural background and, if so, can the effects be made more equitable? Are weight loss methods tailored to people's background more effective for weight loss and weight maintenance than general methods? | 7.59 (2.41)     |
| 11   | Are people living with obesity at higher risk of infectious diseases? Are they at higher risk of severe consequences from these diseases? What are the proposed mechanisms?                                                                                                                                                                                                                                                                                                                                               | 7.54 (2.31)     |
| =12  | Is weight loss an effective treatment for certain medical conditions and chronic illnesses, e.g. polycystic ovary syndrome (PCOS), hypothyroidism, lipaedema, gastrointestinal conditions, heart failure, osteoarthritis, chronic pain etc? Should specific weight loss methods be recommended for people with overweight and obesity with certain medical conditions and chronic illnesses?                                                                                                                              | 7.53 (2.40)     |
| =12  | Do parents' attitudes to food influence their children's food intake and risk of obesity?                                                                                                                                                                                                                                                                                                                                                                                                                                 | 7.53 (2.35)     |
| =12  | Does the quality or amount of sleep influence bodyweight? Do interventions that increase/ decrease sleep affect weight loss and weight maintenance?                                                                                                                                                                                                                                                                                                                                                                       | 7.50 (2.15)     |
| =12  | In people living with overweight and type 2 diabetes, does losing weight lead to diabetes remission and how long does remission last? What health checks are needed for people who have achieved diabetes remission?                                                                                                                                                                                                                                                                                                      | 7.47 (2.41)     |
| =16  | Does losing weight and regaining it repeatedly adversely affect long-term health or psychological wellbeing compared with staying at a higher weight the whole time?                                                                                                                                                                                                                                                                                                                                                      | 7.45 (2.60)     |
| =16  | How do genetic factors, physiological and metabolic processes affect weight status, weight gain and regional fat distribution? What are the mechanisms involved? Do these factors affect the                                                                                                                                                                                                                                                                                                                              | 7.45 (2.20)     |

|     |                                                                                                                                                                                                                                                                                                                                                                                                                                                                  |                |
|-----|------------------------------------------------------------------------------------------------------------------------------------------------------------------------------------------------------------------------------------------------------------------------------------------------------------------------------------------------------------------------------------------------------------------------------------------------------------------|----------------|
|     | ability to lose and maintain body weight? Do weight loss programmes tailored to a person's genetic makeup or physiology produce greater weight loss than untailored programmes?                                                                                                                                                                                                                                                                                  |                |
| 18  | Do interventions that target the 'obesogenic environment', such as community interventions, urban planning, placement of fast food outlets or workplace policies, affect population mean weight and do these effects differ by baseline weight status (underweight, healthy weight, overweight, obesity)? Which of this type of interventions are most effective at reaching low socio-economic groups?                                                          | 7.44<br>(2.40) |
| 19  | Why do some people struggle to maintain motivation during a weight loss attempt?                                                                                                                                                                                                                                                                                                                                                                                 | 7.41<br>(2.54) |
| 20  | What are the effects of obesity in childhood on outcomes other than physical health e.g. psychological wellbeing, educational achievement, employment, relationship status etc?                                                                                                                                                                                                                                                                                  | 7.39<br>(2.37) |
| 21  | Does incorporating physical activity into weight loss interventions enhance weight loss? Does this depend upon the frequency and type of physical activity (e.g. high vs low intensity, resistance vs cardiorespiratory activity)?                                                                                                                                                                                                                               | 7.36<br>(2.37) |
| 22  | What effect do working hours (e.g. shift work) and/ or a late eating pattern have on body weight and adiposity ?                                                                                                                                                                                                                                                                                                                                                 | 7.35<br>(2.70) |
| 23  | Does being physically active mitigate the health consequences of overweight/obesity?                                                                                                                                                                                                                                                                                                                                                                             | 7.31<br>(2.12) |
| 23  | Does prolonged psychological stress affect bodyweight? Do interventions that aim to reduce stress increase weight loss in people living with overweight and obesity compared with interventions not addressing stress?                                                                                                                                                                                                                                           | 7.31<br>(2.20) |
| 25  | Do interventions that address emotional or social overeating lead to weight loss or weight loss maintenance?                                                                                                                                                                                                                                                                                                                                                     | 7.29<br>(2.43) |
| 26  | What is the relationship between emotions and appetite or energy intake?                                                                                                                                                                                                                                                                                                                                                                                         | 7.19<br>(2.29) |
| 27  | What changes in supermarkets or the wider food industry are effective in promoting healthier diets? Does changing labelling and/ or packaging on foods affect purchasing, consumption and body weight?                                                                                                                                                                                                                                                           | 7.18<br>(2.36) |
| 28  | Do interventions in primary care prevent obesity? What are the effects of offering weight management referrals on the prevalence of obesity?                                                                                                                                                                                                                                                                                                                     | 7.17<br>(2.30) |
| 28  | How accurate are existing models of the health consequences of excess weight and the impact of weight loss? Which assumptions are critical in determining the long-term effectiveness and cost-effectiveness of weight loss interventions? What is the impact of weight regain on the incidence of disease and cost-effectiveness of weight loss interventions in these models ?                                                                                 | 7.17<br>(2.21) |
| 28  | How does the brain control food intake and can we use knowledge of these mechanisms to aid weight loss? What are the brain responses to food during weight loss and following weight regain?                                                                                                                                                                                                                                                                     | 7.17<br>(2.51) |
| 28  | Does social influence affect the amount of energy dense-nutrient poor foods or consumption of healthier foods, and can these norms be changed?                                                                                                                                                                                                                                                                                                                   | 7.17<br>(2.24) |
| 32  | What is the effect of parental support for their children's weight management on weight in a child living with obesity? Are family based interventions aiming at childhood weight control effective?                                                                                                                                                                                                                                                             | 7.16<br>(2.34) |
| 33  | What are the effects of interventions to influence health professionals to support patients with overweight and obesity?                                                                                                                                                                                                                                                                                                                                         | 7.15<br>(2.32) |
| 34  | What is the effect of adult obesity on social behaviour, self-confidence, self-esteem and self-worth?                                                                                                                                                                                                                                                                                                                                                            | 7.14<br>(2.38) |
| 35  | Does the gut microbiome have an effect on weight gain or the risk of obesity? Does the gut microbiome influence body composition or fat distribution? Do human genetics influence the gut microbiome? Can a change in gut microbiome aid weight loss and by what mechanisms? Which strains of bacteria are associated with greatest weight loss during a weight loss attempt? What is the effect of prebiotics or probiotics on weight loss/ weight maintenance? | 7.12<br>(2.53) |
| 36  | What impact does obesity have on life opportunities? E.g. employment, marital status, happiness, education.                                                                                                                                                                                                                                                                                                                                                      | 7.11<br>(2.65) |
| =37 | How effective and cost effective are subsidies for healthy food or access to leisure facilities to prevent or treat obesity?                                                                                                                                                                                                                                                                                                                                     | 7.10<br>(2.45) |

|    |     |                                                                                                                                                                                                                                                                                     |                |
|----|-----|-------------------------------------------------------------------------------------------------------------------------------------------------------------------------------------------------------------------------------------------------------------------------------------|----------------|
| 1  | =37 | Does obesity cause dementia?                                                                                                                                                                                                                                                        | 7.10<br>(2.34) |
| 2  |     |                                                                                                                                                                                                                                                                                     |                |
| 3  | =37 | Is there a difference in the way that health professionals respond to patients living with obesity compared with people of a healthy weight in terms of investigation, diagnosis and follow up?                                                                                     | 7.10<br>(2.49) |
| 4  |     |                                                                                                                                                                                                                                                                                     |                |
| 5  | 40  | Are interventions to treat children or adolescents living with severe obesity effective?                                                                                                                                                                                            | 7.08<br>(2.54) |
| 6  |     |                                                                                                                                                                                                                                                                                     |                |
| 7  | 41  | Is it better to advise incorporating physical activity into daily life or taking formal exercise to increase overall levels of physical activity in the population?                                                                                                                 | 7.07<br>(2.41) |
| 8  |     |                                                                                                                                                                                                                                                                                     |                |
| 9  |     |                                                                                                                                                                                                                                                                                     |                |
| 10 | 42  | Are there benefits of some types of diets on diabetes that are independent of the amount of weight lost?                                                                                                                                                                            | 7.06<br>(2.27) |
| 11 |     |                                                                                                                                                                                                                                                                                     |                |
| 12 | 43  | What is the impact of reducing the availability of energy dense-nutrient poor foods on overall energy intake?                                                                                                                                                                       | 7.05<br>(2.77) |
| 13 |     |                                                                                                                                                                                                                                                                                     |                |
| 14 | =44 | What are the mechanisms that lead to satiation during meals?                                                                                                                                                                                                                        | 7.04<br>(2.28) |
| 15 |     |                                                                                                                                                                                                                                                                                     |                |
| 16 | =44 | Does having a choice of how to lose weight improve the success of the weight loss attempt?                                                                                                                                                                                          | 7.04<br>(2.48) |
| 17 |     |                                                                                                                                                                                                                                                                                     |                |
| 18 |     |                                                                                                                                                                                                                                                                                     |                |
| 19 | =44 | In people living with obesity, does losing weight affect how the heart works?                                                                                                                                                                                                       | 7.00<br>(2.32) |
| 20 |     |                                                                                                                                                                                                                                                                                     |                |
| 21 |     |                                                                                                                                                                                                                                                                                     |                |
| 22 | =44 | How do we assess cardiovascular risk in people living with overweight and obesity? Should we stratify interventions for weight loss based on cardiovascular risk in those living with overweight and obesity?                                                                       | 7.00<br>(2.24) |
| 23 |     |                                                                                                                                                                                                                                                                                     |                |
| 24 |     |                                                                                                                                                                                                                                                                                     |                |
| 25 | 48  | Can the provision of healthy school food reduce obesity in children?                                                                                                                                                                                                                | 6.99<br>(2.73) |
| 26 |     |                                                                                                                                                                                                                                                                                     |                |
| 27 | =49 | What are the most effective treatments for obesity in people with severe mental illness? Is integrating weight management into mental healthcare effective in supporting weight loss or weight loss maintenance?                                                                    | 6.98<br>(2.36) |
| 28 |     |                                                                                                                                                                                                                                                                                     |                |
| 29 |     |                                                                                                                                                                                                                                                                                     |                |
| 30 | =49 | Does living with obesity affect quality of life? Does losing weight or gaining weight affect quality of life in people living with overweight and obesity?                                                                                                                          | 6.98<br>(2.61) |
| 31 |     |                                                                                                                                                                                                                                                                                     |                |
| 32 |     |                                                                                                                                                                                                                                                                                     |                |
| 33 | =51 | Do family dynamics cause unhealthy weight gain?                                                                                                                                                                                                                                     | 6.97<br>(2.59) |
| 34 |     |                                                                                                                                                                                                                                                                                     |                |
| 35 | =51 | Why do some people living with overweight and obesity do insufficient physical activity and what advice or interventions might increase this?                                                                                                                                       | 6.97<br>(2.52) |
| 36 |     |                                                                                                                                                                                                                                                                                     |                |
| 37 | =53 | Do interventions to encourage healthier food purchasing affect population mean weight or the prevalence of overweight and obesity?                                                                                                                                                  | 6.96<br>(2.46) |
| 38 |     |                                                                                                                                                                                                                                                                                     |                |
| 39 |     |                                                                                                                                                                                                                                                                                     |                |
| 40 | =53 | Does eating a diet high in processed foods make losing weight, maintaining lost weight, or gaining weight more likely? Do diets high in processed foods lead to a higher incidence of weight-related illness, such as diabetes or heart disease, independent of body weight status? | 6.96<br>(2.69) |
| 41 |     |                                                                                                                                                                                                                                                                                     |                |
| 42 |     |                                                                                                                                                                                                                                                                                     |                |
| 43 | =53 | Does eating a diet high in processed foods make losing weight, maintaining lost weight, or gaining weight more likely? Do diets high in processed foods lead to a higher incidence of weight-related illness, such as diabetes or heart disease, independent of body weight status? | 6.96<br>2.69   |
| 44 |     |                                                                                                                                                                                                                                                                                     |                |
| 45 |     |                                                                                                                                                                                                                                                                                     |                |
| 46 | 55  | What are the health risks for individuals who have previously been overweight but have now lost weight compared with those who have never been overweight?                                                                                                                          | 6.93<br>(2.43) |
| 47 |     |                                                                                                                                                                                                                                                                                     |                |
| 48 | 56  | How do energy requirements change following weight loss and what are the mechanisms involved?                                                                                                                                                                                       | 6.92<br>(2.36) |
| 49 |     |                                                                                                                                                                                                                                                                                     |                |
| 50 |     |                                                                                                                                                                                                                                                                                     |                |
| 51 | 57  | Can interventions modify individuals' food preferences and does this affect weight outcomes?                                                                                                                                                                                        | 6.91<br>(2.29) |
| 52 |     |                                                                                                                                                                                                                                                                                     |                |
| 53 | 58  | Does the imagery used in weight loss interventions and public health messaging affect motivation for behaviour change?                                                                                                                                                              | 6.88<br>(2.48) |
| 54 |     |                                                                                                                                                                                                                                                                                     |                |
| 55 | 59  | Does the amount of sugar in baby food affect children's weight gain?                                                                                                                                                                                                                | 6.83<br>(2.62) |
| 56 |     |                                                                                                                                                                                                                                                                                     |                |
| 57 | 60  | Is overeating a form of self-harm for some people living with obesity?                                                                                                                                                                                                              | 6.80<br>(2.86) |
| 58 |     |                                                                                                                                                                                                                                                                                     |                |
| 59 | =61 | Does the mode of delivery e.g. in-person face-to-face, group, digital, telephone influence the weight loss achieved by a weight loss programme?                                                                                                                                     | 6.80<br>(2.45) |
| 60 |     |                                                                                                                                                                                                                                                                                     |                |

|                                  |     |                                                                                                                                                                                                                                                                                                                                                                                                                                                 |              |
|----------------------------------|-----|-------------------------------------------------------------------------------------------------------------------------------------------------------------------------------------------------------------------------------------------------------------------------------------------------------------------------------------------------------------------------------------------------------------------------------------------------|--------------|
| 1<br>2                           | =61 | Does age of onset of obesity or years lived with obesity influence the effectiveness of specific weight loss methods?                                                                                                                                                                                                                                                                                                                           | 6.80<br>2.27 |
| 3<br>4                           | =63 | Does childhood trauma or mental health disorder in childhood cause obesity?                                                                                                                                                                                                                                                                                                                                                                     | 6.79<br>2.63 |
| 5<br>6<br>7                      | =63 | Is attempting to avoid snacking more or less effective than 'little and often' for weight loss and weight maintenance?                                                                                                                                                                                                                                                                                                                          | 6.79<br>2.56 |
| 8<br>9                           | 65  | Does fast food advertising affect the prevalence of overweight and obesity in childhood?                                                                                                                                                                                                                                                                                                                                                        | 6.78<br>2.80 |
| 10<br>11<br>12<br>13             | 66  | Do markers of blood glucose control and cardiovascular disease (e.g. insulin, glucagon, HbA1c, blood pressure, cholesterol etc) predict weight gain and obesity? What effect do these markers have on weight loss and weight maintenance?                                                                                                                                                                                                       | 6.77<br>2.39 |
| 14<br>15                         | 67  | What are the most accurate and practical ways to measure dietary intake?                                                                                                                                                                                                                                                                                                                                                                        | 6.76<br>2.67 |
| 16<br>17<br>18                   | 68  | Do weight loss interventions improve blood glucose control or influence cardiovascular risk in people living with type 1 diabetes and obesity and what are the adverse effects?                                                                                                                                                                                                                                                                 | 6.75<br>2.51 |
| 19<br>20                         | 69  | Is there institutional bias towards people living with overweight and obesity in different employment sectors and can this be changed?                                                                                                                                                                                                                                                                                                          | 6.73<br>2.72 |
| 21<br>22                         | 70  | Do diets high in fat or high in sugar increase the likelihood of gaining weight?                                                                                                                                                                                                                                                                                                                                                                | 6.71<br>2.80 |
| 23<br>24<br>25                   | =71 | What are the effects of tier 3 services on weight loss and are these services cost-effective?                                                                                                                                                                                                                                                                                                                                                   | 6.68<br>2.20 |
| 26<br>27<br>28                   | =71 | Do restrictive or permissive diets lead to greater weight loss or weight loss maintenance? Is permissive messaging about dietary change more effective at maintaining a healthy weight than restrictive messaging?                                                                                                                                                                                                                              | 6.68<br>2.26 |
| 29<br>30<br>31<br>32<br>33<br>34 | 73  | How do the words used to define and describe overweight and obesity affect perceived discrimination as well as emotional and psychological wellbeing in people living with overweight and obesity? Would changing the language reduce the blame culture associated with obesity? What language used in public health messaging about overweight/obesity encourages weight control without increasing stigma towards people living with obesity? | 6.67<br>2.75 |
| 35<br>36                         | =74 | What is the role of the adipocyte life cycle in body weight and obesity?                                                                                                                                                                                                                                                                                                                                                                        | 6.66<br>2.36 |
| 37<br>38<br>39<br>40             | =74 | Do food additives and non-nutritive sweeteners affect appetite regulation, post-prandial metabolic and endocrine responses and energy intake? Is replacing sugar with non-nutritive sweeteners an effective method of weight loss and weight maintenance?                                                                                                                                                                                       | 6.66<br>2.70 |
| 41<br>42                         | 76  | What medical conditions can lead to weight gain and obesity?                                                                                                                                                                                                                                                                                                                                                                                    | 6.65<br>2.55 |
| 43<br>44<br>45<br>46             | 77  | Do social prescribing schemes such as community gardening, cookery classes, choir, lunch club, or book clubs lead to greater weight loss when trying to lose weight than attempting weight loss without such prescription?                                                                                                                                                                                                                      | 6.64<br>2.47 |
| 47<br>48                         | 78  | What effect does social media have on eating behaviours and weight control?                                                                                                                                                                                                                                                                                                                                                                     | 6.63<br>2.61 |
| 49<br>50<br>51                   | 79  | Are there methods to combine pharmacological and behavioural weight loss treatments that mean the combination is greater than the sum of the parts?                                                                                                                                                                                                                                                                                             | 6.62<br>2.69 |
| 52<br>53                         | =80 | What is the prevalence of disordered eating in people living with obesity? Do weight loss interventions increase the risk of disordered eating?                                                                                                                                                                                                                                                                                                 | 6.61<br>2.22 |
| 54<br>55<br>56<br>57             | =80 | Is it possible to suppress appetite and so reduce energy intake? Is this an effective way to lose weight?                                                                                                                                                                                                                                                                                                                                       | 6.61<br>2.68 |
| 58<br>59                         | 82  | Can screening programmes identify those at risk of developing obesity? Does identifying people at risk and implementing early interventions prevent weight gain?                                                                                                                                                                                                                                                                                | 6.59<br>2.67 |
| 60                               | 83  | What is the role of social networks in weight control? Does having a weight loss buddy lead to better outcomes?                                                                                                                                                                                                                                                                                                                                 | 6.58<br>2.41 |

|                                          |     |                                                                                                                                                                                                                                                                                                                                                                                                                                                                                                                                                                             |              |
|------------------------------------------|-----|-----------------------------------------------------------------------------------------------------------------------------------------------------------------------------------------------------------------------------------------------------------------------------------------------------------------------------------------------------------------------------------------------------------------------------------------------------------------------------------------------------------------------------------------------------------------------------|--------------|
| 1<br>2<br>3                              | =84 | What is the effect of behavioural, dietary, pharmacological, and surgical interventions on body composition and fat distribution? Can exercise attenuate loss of lean tissue associated with weight loss?                                                                                                                                                                                                                                                                                                                                                                   | 6.57<br>2.31 |
| 4<br>5                                   | =84 | What interventions can help parents to identify if their child is overweight and does this increase their engagement in weight management services?                                                                                                                                                                                                                                                                                                                                                                                                                         | 6.57<br>2.67 |
| 6<br>7<br>8<br>9<br>10<br>11<br>12<br>13 | 86  | What are the advantages and disadvantages of the various methods of quantifying body fat in routine healthcare? What is the association between these measures and risk of obesity-related health outcomes? What are the most appropriate classifications for overweight and obesity in different demographic groups, e.g. ethnicity, age, gender? Can we develop an easy measurement for 'Thin on Outside, Fat on Inside' for use in routine healthcare? What is the association between being 'Thin on Outside, Fat on Inside' and other obesity related outcomes?        | 6.55<br>2.34 |
| 14<br>15                                 | =87 | Do interventions in the general population to improve cookery skills improve weight control?                                                                                                                                                                                                                                                                                                                                                                                                                                                                                | 6.53<br>2.53 |
| 16<br>17<br>18                           | =87 | Is limiting daily energy intake a more successful method than limiting daily carbohydrate intake for weight loss and weight maintenance?                                                                                                                                                                                                                                                                                                                                                                                                                                    | 6.53<br>2.52 |
| 19<br>20<br>21<br>22<br>23<br>24<br>25   | =89 | Is attempting to follow intermittent fasting (including 5:2, every other day diet, etc.) or time restricted eating (e.g. 16:8 or eating between specific hours of the day) effective for weight loss and weight maintenance? Is intermittent fasting or time restricted eating more effective than calorie restriction alone? Are the benefits from intermittent fasting or time restricted eating (e.g. metabolic health, general wellbeing) independent from weight loss? Are there any side effects or health risks from intermittent fasting or time restricted eating? | 6.52<br>2.60 |
| 26<br>27<br>28<br>29                     | =89 | Do people crave or become addicted to certain foods and, if so does this cause obesity? Can treatments reduce pica, food cravings or addiction?                                                                                                                                                                                                                                                                                                                                                                                                                             | 6.52<br>2.53 |
| 30<br>31<br>32<br>33<br>34               | =89 | Is taxing unhealthy foods and drink effective in reducing the prevalence of overweight and obesity?                                                                                                                                                                                                                                                                                                                                                                                                                                                                         | 6.52<br>2.81 |
| 35<br>36<br>37<br>38<br>39               | 92  | Is obesity a cause or a consequence of reduced physical activity?                                                                                                                                                                                                                                                                                                                                                                                                                                                                                                           | 6.51<br>2.54 |
| 40<br>41<br>42<br>43<br>44               | 93  | Would rules that limit the energy or macronutrient content of certain categories of food products affect the prevalence of overweight and obesity?                                                                                                                                                                                                                                                                                                                                                                                                                          | 6.49<br>2.54 |
| 45<br>46<br>47<br>48<br>49               | =94 | Does the menopause cause weight gain/loss? Does the age at menopause affect weight gain and weight loss?                                                                                                                                                                                                                                                                                                                                                                                                                                                                    | 6.46<br>2.46 |
| 50<br>51<br>52<br>53<br>54               | =94 | What effect does social media have on self-confidence, self-esteem and self-worth of people living with overweight and obesity?                                                                                                                                                                                                                                                                                                                                                                                                                                             | 6.46<br>2.78 |
| 55<br>56<br>57<br>58<br>59<br>60         | =96 | What are the most accurate and practical ways to measure total energy expenditure and physical activity?                                                                                                                                                                                                                                                                                                                                                                                                                                                                    | 6.44<br>2.66 |

|                                  |      |                                                                                                                                                                                                                                                                                                                                                                                        |              |
|----------------------------------|------|----------------------------------------------------------------------------------------------------------------------------------------------------------------------------------------------------------------------------------------------------------------------------------------------------------------------------------------------------------------------------------------|--------------|
| 1<br>2<br>3<br>4                 | =96  | In women entering pregnancy with overweight or obesity, do intentional efforts to reduce the amount of weight gained reduce the risk of obesity in the offspring?                                                                                                                                                                                                                      | 6.44<br>2.59 |
| 5<br>6<br>7<br>8<br>9            | 98   | Does informing a person living with overweight or obesity that she or he has non-alcoholic fatty liver disease (NAFLD) motivate weight loss?                                                                                                                                                                                                                                           | 6.40<br>2.60 |
| 10<br>11<br>12<br>13<br>14       | 99   | Are there long-term health benefits from short-term weight loss? If so, is there a minimum amount of weight loss/ duration that has clear benefits?                                                                                                                                                                                                                                    | 6.39<br>2.39 |
| 15<br>16<br>17<br>18<br>19       | =100 | Are interventions aimed at weight control effective in helping women entering pregnancy with overweight or obesity limit weight gain during pregnancy or lose weight after birth?                                                                                                                                                                                                      | 6.38<br>2.47 |
| 20<br>21<br>22<br>23<br>24       | =100 | Are total diet replacement programmes with behavioural support as effective as using diet replacement products without behavioural support?                                                                                                                                                                                                                                            | 6.38<br>2.66 |
| 25<br>26<br>27<br>28<br>29       | 102  | What are the effects of the body positivity movement on body weight?                                                                                                                                                                                                                                                                                                                   | 6.36<br>2.70 |
| 30<br>31<br>32<br>33<br>34       | 103  | Does breastfeeding increase post-partum weight loss or reduce risk of later obesity for the mother?                                                                                                                                                                                                                                                                                    | 6.34<br>2.70 |
| 35<br>36<br>37<br>38<br>39       | 104  | What are the effects on health of having a body mass index (BMI) within the overweight/obese range yet with high proportion of lean tissue/high muscle mass?                                                                                                                                                                                                                           | 6.33<br>2.62 |
| 40<br>41<br>42<br>43<br>44       | =105 | Has the National Childhood Measurement Programme had an effect upon weight trajectories, health care usage, and mental health of children or their parents?                                                                                                                                                                                                                            | 6.32<br>2.67 |
| 45<br>46<br>47<br>48             | =105 | Does attempting to limit alcohol intake reduce the risk of weight gain or increase weight loss?                                                                                                                                                                                                                                                                                        | 6.32<br>2.75 |
| 49<br>50<br>51<br>52<br>53<br>54 | 107  | Does the low carbohydrate ketogenic diet cause greater weight loss than a reduced carbohydrate non-ketogenic diet? Is attempting to follow a ketogenic or reduced carbohydrate diet safe and effective for weight loss and weight loss maintenance? What are the effects on fat distribution/body composition of these diets? Are there any adverse effects or long-term health risks? | 6.31<br>2.88 |
| 55<br>56<br>57<br>58<br>59<br>60 | 108  | Does the fact that most people are overweight mean that people are less concerned about their own excess weight?                                                                                                                                                                                                                                                                       | 6.28<br>2.76 |



|                            |      |                                                                                                                                                                                                                                                                                                                                                   |              |
|----------------------------|------|---------------------------------------------------------------------------------------------------------------------------------------------------------------------------------------------------------------------------------------------------------------------------------------------------------------------------------------------------|--------------|
| 1<br>2<br>3<br>4           | 109  | Are workplace interventions to support active commuting, or schemes to increase physical activity provided through workplaces feasible, acceptable, and do they affect weight?                                                                                                                                                                    | 6.26<br>2.23 |
| 5<br>6<br>7<br>8<br>9      | 110  | Is training people to eat less through techniques such as mindfulness or slow eating, or responding to internal hunger and thirst cues effective in helping people lose weight?                                                                                                                                                                   | 6.25<br>2.76 |
| 10<br>11<br>12<br>13<br>14 | =111 | Do some people living with overweight and obesity not recognise that they are overweight and what effect would interventions to improve recognition have?                                                                                                                                                                                         | 6.19<br>2.65 |
| 15<br>16<br>17<br>18<br>19 | =111 | Do interventions, including clinical follow-up, after bariatric surgery prevent weight regain?                                                                                                                                                                                                                                                    | 6.19<br>2.56 |
| 20<br>21<br>22<br>23<br>24 | =111 | Does the perception that the causes of obesity relate to matters of personal responsibility motivate people to control their own weight?                                                                                                                                                                                                          | 6.19<br>2.49 |
| 25<br>26<br>27<br>28       | =111 | What are the adverse consequences of bariatric surgery and can these be predicted?                                                                                                                                                                                                                                                                | 6.19<br>2.51 |
| 29<br>30<br>31<br>32<br>33 | 115  | Do marketing campaigns or policy changes affect population mean weight and do these effects differ by baseline weight status (underweight, healthy weight, overweight, obesity)? Do marketing campaigns, policy changes and community interventions prevent weight gain, prompt attempts to lose weight or enhance weight loss in those attempts? | 6.18<br>2.52 |
| 34<br>35<br>36<br>37<br>38 | 116  | How effective are interventions to reduce portions in restaurants, café/ food outlets on energy intake and the prevalence of overweight and obesity?                                                                                                                                                                                              | 6.16<br>2.77 |
| 39<br>40<br>41<br>42<br>43 | 117  | Do the prevailing messages about the costs of obesity on healthcare affect prevalence of obesity or bias against people living with overweight?                                                                                                                                                                                                   | 6.15<br>2.66 |
| 44<br>45<br>46<br>47<br>48 | 118  | Does the level of naturally occurring sex hormones (testosterone, oestrogen, progesterone) influence bodyweight? Does administering sex hormones lead to weight loss or weight loss maintenance, e.g. Hormone replacement therapy (HRT) , testosterone etc?                                                                                       | 6.14<br>2.43 |
| 49<br>50<br>51<br>52<br>53 | 119  | Are high protein diets safe and effective for weight loss and weight loss maintenance?                                                                                                                                                                                                                                                            | 6.10<br>2.65 |
| 54<br>55<br>56<br>57<br>58 | 120  | Does the macronutrient composition of the diet influence the progression of non-alcoholic fatty liver disease (NAFLD) in people living with obesity?                                                                                                                                                                                              | 6.06<br>2.53 |
| 59<br>60                   | =121 | What methods are available to measure diet in infants, children, and adolescents and how do they compare in reliability and practicality?                                                                                                                                                                                                         | 6.02<br>2.68 |

|                            |      |                                                                                                                                                                                                                                                                                                                                                                               |              |
|----------------------------|------|-------------------------------------------------------------------------------------------------------------------------------------------------------------------------------------------------------------------------------------------------------------------------------------------------------------------------------------------------------------------------------|--------------|
| 1<br>2<br>3<br>4           | =121 | Is the use of commonly prescribed medications (e.g. antibiotics and pain medication) related to weight gain and obesity? What are the effective methods to prevent weight gain and achieve weight loss in people taking medications known to cause weight gain?                                                                                                               | 6.02<br>2.43 |
| 5<br>6<br>7<br>8<br>9      | 123  | How effective are emerging pharmacological treatments for weight loss and how can we develop new drug treatments to help people lose weight (e.g. appetite suppressants, nutrient absorption etc)?                                                                                                                                                                            | 5.99<br>2.71 |
| 10<br>11<br>12<br>13<br>14 | 124  | Why do some people with overweight try to lose weight and some people with overweight do not?                                                                                                                                                                                                                                                                                 | 5.98<br>2.64 |
| 15<br>16<br>17<br>18<br>19 | 125  | Do interventions in the general population to grow food improve weight control?                                                                                                                                                                                                                                                                                               | 5.91<br>2.64 |
| 20<br>21<br>22<br>23<br>24 | 126  | Does having heavy or irregular periods affect bodyweight?                                                                                                                                                                                                                                                                                                                     | 5.89<br>2.56 |
| 25<br>26<br>27<br>28<br>29 | =127 | Are total diet replacement programmes (based on energy restricted formula food products) effective, safe, and tolerable for weight management in special populations e.g. attenuation of weight gain in pregnant women or for other groups where rapid weight loss may change outcomes, such as prior to a planned surgery?                                                   | 5.86<br>2.55 |
| 30<br>31<br>32<br>33       | =127 | Why do people living with severe obesity eligible for surgery decide not to proceed with the surgery and do they take up other interventions?                                                                                                                                                                                                                                 | 5.86<br>2.55 |
| 34<br>35<br>36<br>37<br>38 | =127 | Does endorsement or delivery of interventions by different sources enhance the effectiveness of weight loss interventions? E.g. GP referral, celebrity endorsements, social media, family and friends. Does measurement and acknowledgement of body mass index (BMI) by a credible source influence motivation to attempt weight loss or adherence to weight loss programmes? | 5.86<br>2.51 |
| 39<br>40<br>41<br>42<br>43 | 130  | Is a vegan, vegetarian diet, pescatarian diet or a diet inclusive of meat better for weight loss, weight maintenance and metabolic health?                                                                                                                                                                                                                                    | 5.83<br>2.67 |
| 44<br>45<br>46<br>47<br>48 | =131 | Has the fat distribution in females changed over time?                                                                                                                                                                                                                                                                                                                        | 5.82<br>2.80 |
| 49<br>50<br>51<br>52<br>53 | =131 | Does effectiveness of weight loss interventions vary depending on weight status of the individual delivering the intervention?                                                                                                                                                                                                                                                | 5.82<br>2.66 |
| 54<br>55<br>56<br>57       | 133  | How do diets with varying macronutrient composition affect adherence to energy restriction?                                                                                                                                                                                                                                                                                   | 5.80<br>2.72 |
| 58<br>59<br>60             | 134  | Do vitamin and mineral deficiencies cause or contribute to weight gain? Do vitamins, minerals and other dietary supplements aid weight loss?                                                                                                                                                                                                                                  | 5.70<br>2.52 |

|                            |     |                                                                                                                                                                                                       |              |
|----------------------------|-----|-------------------------------------------------------------------------------------------------------------------------------------------------------------------------------------------------------|--------------|
| 1<br>2<br>3<br>4           | 135 | Does variation in gastric capacity explain who does and does not develop obesity?                                                                                                                     | 5.63<br>2.46 |
| 5<br>6<br>7<br>8<br>9      | 136 | Does advice to omit breakfast lead to greater weight loss and better weight maintenance than dietary advice that includes breakfast?                                                                  | 5.60<br>2.75 |
| 10<br>11<br>12<br>13<br>14 | 137 | What is the effectiveness and cost-effectiveness of bariatric surgery for people with type 1 and type 2 diabetes with any degree of overweight but with a body mass index (BMI) <math>\geq 35</math>? | 5.57<br>2.54 |
| 15<br>16<br>17<br>18<br>19 | 138 | Do concerns about the environment and sustainability affect weight?                                                                                                                                   | 5.55<br>2.78 |
| 20<br>21<br>22<br>23<br>24 | 139 | What is the impact of cookery related television programmes on diet and weight?                                                                                                                       | 5.48<br>2.84 |
| 25<br>26<br>27<br>28<br>29 | 140 | Are people with addictions to drugs and alcohol at greater risk of unhealthy weight gain?                                                                                                             | 5.39<br>2.73 |
| 30<br>31<br>32<br>33<br>34 | 141 | What are the psychosocial consequences of bariatric surgery for example, on intimate relationships and eating disorders, and do these vary by social and cultural group?                              | 5.32<br>2.45 |
| 35<br>36<br>37<br>38<br>39 | 142 | What are the methods available to measure adiposity in children? How valid and reliable are these methods?                                                                                            | 5.31<br>2.48 |
| 40<br>41<br>42<br>43<br>44 | 143 | Does pseudogynaecomastia in men living with obesity influence psychological wellbeing?                                                                                                                | 5.23<br>2.52 |
| 45<br>46<br>47<br>48       | 144 | Does autism increase the risk of obesity?                                                                                                                                                             | 5.16<br>2.55 |
| 49<br>50<br>51<br>52<br>53 | 145 | How does people's perception of air quality affect their engagement in outdoor physical activity and does this influence their weight?                                                                | 4.80<br>2.74 |
| 54<br>55<br>56<br>57<br>58 | 146 | Does having a liver transplant in childhood or adolescence lead to unhealthy weight gain?                                                                                                             | 4.67<br>2.42 |
| 59<br>60                   | 147 | What is the association between clothing size and body mass index (BMI)?                                                                                                                              | 4.66<br>2.92 |

|                       |     |                                                                                                                            |              |
|-----------------------|-----|----------------------------------------------------------------------------------------------------------------------------|--------------|
| 1<br>2<br>3<br>4      | 148 | Do 'speciality foods' including genetically modified and organic foods influence total energy intake and hence bodyweight? | 4.56<br>2.76 |
| 5<br>6<br>7<br>8<br>9 | 149 | How does imprisonment effect body weight? What factors influence weight change and obesity during imprisonment?            | 4.46<br>2.49 |

\*Mean number of people who ranked each question (SD): 115 (9.7) Mean priority score (SD): 6.61 (2.5)

For peer review only

# BMJ Open

## Setting the top 10 priorities for obesity and weight-related research (POWeR): a stakeholder priority setting process

|                                 |                                                                                                                                                                                                                                                                                                                                                                                                                                                                                                                                                                                                                                                                               |
|---------------------------------|-------------------------------------------------------------------------------------------------------------------------------------------------------------------------------------------------------------------------------------------------------------------------------------------------------------------------------------------------------------------------------------------------------------------------------------------------------------------------------------------------------------------------------------------------------------------------------------------------------------------------------------------------------------------------------|
| Journal:                        | <i>BMJ Open</i>                                                                                                                                                                                                                                                                                                                                                                                                                                                                                                                                                                                                                                                               |
| Manuscript ID                   | bmjopen-2021-058177.R1                                                                                                                                                                                                                                                                                                                                                                                                                                                                                                                                                                                                                                                        |
| Article Type:                   | Original research                                                                                                                                                                                                                                                                                                                                                                                                                                                                                                                                                                                                                                                             |
| Date Submitted by the Author:   | 14-Apr-2022                                                                                                                                                                                                                                                                                                                                                                                                                                                                                                                                                                                                                                                                   |
| Complete List of Authors:       | Butler, Ailsa R; University of Oxford, Nuffield Department of Primary Care Health Sciences<br>Astbury, Nerys; Oxford University, Nuffield Department of Primary Care Health Sciences<br>Goddard, Lucy; University of Oxford, Nuffield Department of Primary Care Health Sciences<br>Hajizadeh , Anisa ; University of Oxford, Nuffield Department of Primary Care Health Sciences<br>Seeber, Philippa; Patient and Public contributor<br>Crawley, Bruce; Patient and Public contributor<br>Aveyard, Paul; University of Oxford, Nuffield Department of Primary Care Health Sciences<br>Jebb, Susan; University of Oxford, Nuffield Department of Primary Care Health Sciences |
| <b>Primary Subject Heading</b>: | Research methods                                                                                                                                                                                                                                                                                                                                                                                                                                                                                                                                                                                                                                                              |
| Secondary Subject Heading:      | Qualitative research, Research methods                                                                                                                                                                                                                                                                                                                                                                                                                                                                                                                                                                                                                                        |
| Keywords:                       | GENERAL MEDICINE (see Internal Medicine), NUTRITION & DIETETICS, PREVENTIVE MEDICINE, PUBLIC HEALTH                                                                                                                                                                                                                                                                                                                                                                                                                                                                                                                                                                           |
|                                 |                                                                                                                                                                                                                                                                                                                                                                                                                                                                                                                                                                                                                                                                               |

SCHOLARONE™  
Manuscripts



I, the Submitting Author has the right to grant and does grant on behalf of all authors of the Work (as defined in the below author licence), an exclusive licence and/or a non-exclusive licence for contributions from authors who are: i) UK Crown employees; ii) where BMJ has agreed a CC-BY licence shall apply, and/or iii) in accordance with the terms applicable for US Federal Government officers or employees acting as part of their official duties; on a worldwide, perpetual, irrevocable, royalty-free basis to BMJ Publishing Group Ltd ("BMJ") its licensees and where the relevant Journal is co-owned by BMJ to the co-owners of the Journal, to publish the Work in this journal and any other BMJ products and to exploit all rights, as set out in our [licence](#).

The Submitting Author accepts and understands that any supply made under these terms is made by BMJ to the Submitting Author unless you are acting as an employee on behalf of your employer or a postgraduate student of an affiliated institution which is paying any applicable article publishing charge ("APC") for Open Access articles. Where the Submitting Author wishes to make the Work available on an Open Access basis (and intends to pay the relevant APC), the terms of reuse of such Open Access shall be governed by a Creative Commons licence – details of these licences and which [Creative Commons](#) licence will apply to this Work are set out in our licence referred to above.

Other than as permitted in any relevant BMJ Author's Self Archiving Policies, I confirm this Work has not been accepted for publication elsewhere, is not being considered for publication elsewhere and does not duplicate material already published. I confirm all authors consent to publication of this Work and authorise the granting of this licence.

1  
2  
3 **Setting the top 10 priorities for obesity and weight related research (POWER): a**  
4 **stakeholder priority setting process**  
5  
6  
7  
8  
9

10 **Authors**  
11

12 Ailsa R Butler <sup>1\*</sup>, Nerys M Astbury <sup>1\*</sup>, Lucy Goddard <sup>1</sup>, Anisa Hajizadeh <sup>1</sup>, Philippa Seeber <sup>2</sup>,  
13 Bruce Crawley <sup>2</sup>, Paul Aveyard <sup>1†</sup>, Susan A Jebb <sup>1†</sup>  
14  
15

16 **Affiliations**  
17

18  
19 <sup>1</sup> Nuffield Department of Primary Care Health Sciences, University of Oxford, Oxford, UK  
20

21  
22 <sup>2</sup> Public and patient representative  
23

24 \*These authors contributed equally to this work  
25

26  
27 †These authors contributed equally to this work  
28

29 **Corresponding author**  
30

31 Nerys M Astbury, nerys.astbury@phc.ox.ac.uk  
32

33  
34 Nuffield Department of Primary Care Health Sciences, University of Oxford, Radcliffe  
35 Primary Care Building, Radcliffe Observatory Quarter, Woodstock Rd, Oxford OX2 6GG, UK  
36  
37  
38  
39  
40  
41  
42  
43  
44  
45  
46  
47  
48  
49  
50  
51  
52  
53  
54  
55  
56  
57  
58  
59  
60

## Abstract

**Objectives:** To identify and prioritise the most impactful, unanswered questions for obesity and weight-related research.

**Design:** Prioritisation exercise of research questions **using online surveys and an independently facilitated workshop.**

**Setting:** Online/virtual

**Participants:** We involved members of the public including people living with obesity, researchers, healthcare professionals, and policy makers in all stages of this study.

**Primary outcome measures:** Top ten research questions to be prioritised in future obesity and weight-related research.

**Results:** Survey 1 produced 941 questions, from 278 respondents. Of these, 49 questions held satisfactory evidence in the scientific literature, and 149 were out of scope. The remaining 743 questions were, where necessary, amalgamated and rephrased, into a list of 149 unique and unanswered questions. In the second survey, 405 respondents ranked the questions in order of importance. During the workshop, a subset of 38 survey respondents and stakeholders, agreed a final list of 10 priority research questions through small and large group consultation and consensus. The top 10 priority research questions covered: the role of the obesogenic environment; effective weight loss and maintenance strategies; prevention in children; effective prevention and treatment policies; the role of the food industry; access to and affordability of a healthy diet; sociocultural factors associated with weight; the biology of appetite and food intake; and long-term health modelling for obesity.



1  
2  
3 **Conclusions:** This systematic and transparent process identified 149 unique and  
4  
5 unanswered questions in the field of obesity and weight-related research culminating in a  
6  
7 consensus among relevant stakeholders on 10 research priorities. Targeted research funding  
8  
9 in these areas of top priority would lead to needed and impactful knowledge generation for  
10  
11 the field of obesity and weight regulation and thereby improve population health.  
12  
13  
14  
15  
16  
17  
18  
19  
20  
21  
22  
23  
24  
25  
26  
27  
28  
29  
30  
31  
32  
33  
34  
35  
36  
37  
38  
39  
40  
41  
42  
43  
44  
45  
46  
47  
48  
49  
50  
51  
52  
53  
54  
55  
56  
57  
58  
59  
60

For peer review only

### Strengths and limitations

- This is the first research priority setting specific to the field of obesity and weight related research.
- This exercise involved input from a large number of participants from a broad range of relevant stakeholder groups including patients, members of the public, researchers, policymakers, and charities.
- The final list of priorities was reached through consultation and consensus in a workshop guided by independent facilitators to minimise bias towards certain questions or areas.

## Background

Obesity is a major preventable cause of ill-health and is affecting an increasing number of children and adults globally<sup>1 2</sup>. Obesity is defined as a body mass index (BMI) of  $\geq 27.5$  kg/m<sup>2</sup> (or  $\geq 30$  kg/m<sup>2</sup> if of White ethnic groups). No country has managed to achieve a sustained decrease in the prevalence of obesity, despite evidence-based clinical and public health guidelines and policies aimed at tackling obesity<sup>3 4</sup>. Obesity increases the risk of developing several conditions including type 2 diabetes, cardiovascular disease, osteoarthritis, and some cancers<sup>4</sup>. The cost attributable to overweight and obesity are substantial. For example, in the UK's National Health Service (NHS) the cost is projected to reach £9.7 billion per annum, with wider costs to society projected to reach £49.9 billion by 2050 per year<sup>5 6</sup>. The detrimental effects of excess weight are not restricted to those who meet the BMI threshold of obesity as the increased morbidity is seen in people with any degree of excess adiposity<sup>7</sup>. Accordingly, strategies to prevent obesity or excess weight or adiposity are needed, defined here as obesity and weight-related research.

Presently, the research agenda is mainly driven by the interests and concerns of researchers, or research commissioners. A more transparent, systematic, and collaborative approach involving multiple stakeholders to identify research priorities could accelerate progress. The James Lind Alliance (JLA) priority setting process brings patients, carers, and clinicians together on an equal basis to define uncertainties, consider their importance, and thereby set research priorities<sup>7 8</sup>. The output should, and typically has, informed researchers and research funders about the key questions to address in research because it is based upon what matters most to people with lived experience of having a condition and those treating it<sup>9</sup>. Policies to prevent obesity typically affect the whole of society, for

1  
2  
3 example fiscal policies or policies restricting the promotion or selling of some goods.  
4  
5 Likewise, providing treatment for obesity as part of publicly funded healthcare is contested,  
6  
7 and thus questions about research in this area seem to call for a much wider group of  
8  
9 stakeholders than patients, carers, and clinicians. As in a previous tobacco control priority  
10  
11 setting partnership (PSP) <sup>10</sup>, we adapted the JLA approach to incorporate the perspectives of  
12  
13 this wider range of stakeholders including people without experience of obesity, policy-  
14  
15 makers, charities, and, as for JLA, patients and members of the public with a lived  
16  
17 experience of obesity (or related disease), and clinicians <sup>10</sup>. The objective of this work, as the  
18  
19 first prioritisation project in obesity and weight-related research, was to identify  
20  
21 unanswered questions across the whole of the field, from basic science through to health  
22  
23 policy.  
24  
25  
26  
27  
28  
29  
30  
31

## 32 Patient and public involvement (PPI)

33 We involved two members of the public (BC and PS) with lived experience of overweight in  
34  
35 all stages of the project, from conception and design of the study, to its conduct, data  
36  
37 collection and analysis. Our wider public involvement (surveys and workshop) incorporated  
38  
39 members of the public with and without lived experience of being overweight and patients,  
40  
41 defined as people with lived experience of being overweight and experience of receiving  
42  
43 clinical treatment for overweight, obesity, or an associated condition. Members of the  
44  
45 public were involved in all stages of the work alongside and as equal partners with other  
46  
47  
48  
49  
50  
51 stakeholders.  
52  
53  
54  
55  
56  
57  
58  
59  
60

## Subjects and Methods

The priorities for obesity and weight-related research (POWeR) project took place between December 2019 and December 2020. The process was guided by Viergever et al.<sup>11</sup> which outlines principles of priority setting in health research and by the priority setting process carried out by Lindson et al (11). We were guided by the general principles of the James Lind Alliance (JLA) priority setting partnership, however we involved a wider range of stakeholders. We engaged a diverse and representative group of stakeholders comprising members of the public, people with lived experience of overweight and/or obesity, and people who work for organisations and charities, funders, policymakers, clinicians, and academic researchers all involved in the field of overweight and obesity. The prioritisation process had three stages: first an online survey to collect research questions stakeholders deemed to be priorities; a second online survey to rank the priority questions amalgamated from survey 1; and finally, an online workshop to reduce the ranked questions from survey 2 to produce a final list of top-10 priorities. The scope was limited to research questions on the aetiology, consequences, prevention or treatment of overweight and obesity in both adults and children, and did not include questions about whether currently evidenced interventions or policies should be implemented. For example, research questions relating to the prevention or treatment of eating disorders were not within the scope of this prioritisation project, however eating disorders and related psychological adverse events related to weight management programmes were within scope. The protocol for the project was approved by the University of Oxford Medical Sciences Inter-Divisional Research Ethics Committee (Ref: R6721/RE003). There was a study management group of investigators and PPI representatives that met regularly. Survey respondents provided consent to survey 1

1  
2  
3 and survey 2. Participants in the online workshop gave explicit consent prior to  
4  
5 participation.  
6  
7

### 8 9 **Survey 1: Gathering questions and identifying those unanswered**

10  
11 Gathering questions:

12  
13  
14  
15 The first survey in the process asked respondents to submit up to four questions that they  
16  
17 felt should be prioritised in the field of obesity and weight-related research. The survey was  
18  
19 administered online using *JISC Online Survey* and was piloted with our public co-authors and  
20  
21 colleagues in the research team, prior to being launched. The survey asked respondents to  
22  
23 identify research questions that they felt were the most important unanswered questions  
24  
25 on the topic and to say why they felt each question was important. The latter information  
26  
27 was used by the team to interpret, contextualise, group, and sort questions.  
28  
29

30  
31  
32 We publicised the survey passively via a web link on our POWeR project website  
33  
34 (<https://www.phc.ox.ac.uk/research/participate/power>), and actively via email to relevant  
35  
36 stakeholders and Facebook adverts targeted to men. We invited our stakeholders to  
37  
38 circulate the link, resulting in the distribution of the survey by more than 40 organisations to  
39  
40 their members, visitors to their webpages and readers of their newsletters (Supplementary  
41  
42 Table 1). We targeted organisations relevant to the field which included but was not limited  
43  
44 to, obesity charities, community groups, funding bodies, hospital trusts, general practices,  
45  
46 and city councils. Participation in survey 1 was incentivised through a prize draw. We made  
47  
48 physical copies of the survey, and versions with a large font size readily available upon  
49  
50 request. The survey was only available in English, and open for responses for 37 days  
51  
52 between January 15<sup>th</sup> and February 21<sup>st</sup>, 2020.  
53  
54  
55  
56  
57  
58  
59  
60

1  
2  
3 Identifying unanswered questions:  
4  
5

6 Survey 1 questions were grouped by topic area and rephrased to form answerable research  
7  
8 questions (Supplementary Table 2 & 3). We used a multi-level coding system to categorise  
9  
10 questions into overarching categories that were iteratively deduced throughout the  
11  
12 grouping. For example, the submitted question 'which diets work' fell into a macro category,  
13  
14 'treatment' and was then further filtered into the sub-category 'behavioural' over  
15  
16 'pharmaceutical'. Questions organised into groups were then rephrased as research  
17  
18 questions in collaboration with our public co-authors who ensured that the groupings and  
19  
20 rephrasing retained the intent of the original questions, and that they were understandable  
21  
22 to a lay audience while making them tractable to empirical research. For example, a  
23  
24 question such as 'Are there medications to treat obesity?' would have been combined with  
25  
26 others to become a tractable research question such as 'What is the effectiveness, safety,  
27  
28 tolerability, and cost-effectiveness of medications to treat obesity?'  
29  
30  
31  
32  
33  
34  
35

36 We then searched the literature using keywords and MeSH terms informed by the  
37  
38 questions, to determine if these were areas that were already adequately addressed in the  
39  
40 scientific literature. Questions were deemed 'answered' if there was satisfactory evidence.  
41  
42 We accepted satisfactory evidence primarily in the form of pre-processed literature in; 1)  
43  
44 systematic reviews published within the last 10 years, with little to no uncertainty; 2) proof  
45  
46 of evidence in national clinical guidelines (e.g. NICE: National Institute for Health and Care  
47  
48 Excellence, and SIGN: Scottish Intercollegiate Guidelines Network). We also accepted  
49  
50 primary literature by way of high certainty if there was evidence in randomised controlled  
51  
52 trials (RCTs). Such an approach would indicate that the question on currently available  
53  
54  
55  
56  
57  
58  
59  
60

1  
2  
3 pharmacotherapy for obesity, for example, was at least partially answered by current  
4  
5 reviews and trials.  
6

7  
8 We noted how many questions fed into each research question.  
9

## 10 11 12 **Survey 2: Prioritising unanswered research questions** 13

14  
15 The second online survey was piloted with members of the public and colleagues in the  
16  
17 research team. The survey was administered via RedCap, and sent to the 256 survey 1  
18  
19 respondents who had provided us with their email addresses, as well as to the organisations  
20  
21 approached to share survey 1 (see Supplementary Table 1).  
22  
23

24  
25 The second survey remained open for 30 days between August 6<sup>th</sup> and September 14<sup>th</sup>,  
26  
27 2020. Survey 2 asked respondents to prioritise the unanswered questions gleaned from  
28  
29 survey 1, which were sent in batches of about 50 questions to lower the response burden.  
30  
31 The questions in each batch covered the whole range of submitted research questions.  
32  
33 Respondents were asked to rate each question on a scale of 1-10 with 10 representing 'very  
34  
35 important' and 1 representing 'not important'. The mean priority score was calculated for  
36  
37 the resulting rated questions and ranked (Supplementary Table 3) to create a list of the top  
38  
39 30 priority research questions.  
40  
41  
42  
43  
44

## 45 46 **Workshop: Determining the top 10 research priorities** 47

48  
49 We invited a subset of survey respondents and other stakeholders including NGO  
50  
51 representatives, healthcare professionals, public members including people with lived  
52  
53 experience of overweight to take part in a 3-hour online workshop in the winter of 2020 to  
54  
55 determine the top 10 questions. This was a real-time, facilitator led consultation, replacing a  
56  
57 full-day in person event that was not possible due to local COVID-19 restrictions. The group  
58  
59  
60



1  
2  
3 was representative of the multidisciplinary stakeholders involved in the project; patients  
4  
5 and members of the public, researchers, policymakers, clinicians, and relevant research  
6  
7 funders. The workshop was held via a videoconferencing platform (Zoom), and led by  
8  
9 external facilitators from *Hopkins van Mil*, a service that specialises in guiding impartial  
10  
11 discussions to elucidate views and opinions of a diverse group of people in a safe,  
12  
13 productive space<sup>12</sup>. Prior to the workshop, participants were given the resulting top 30  
14  
15 questions from survey 2, in addition to a list of 10 other questions from survey 1 that had  
16  
17 been asked by more than 10 people (Supplementary Table 4). The difference between the  
18  
19 mean ranked scores in survey 2 was subtle. Workshop participants were offered the  
20  
21 opportunity to advocate to include any of these extra 10 that they felt should be considered  
22  
23 in the workshop to be as inclusive as possible. The workshop was divided into small groups  
24  
25 of 4-6 people representing the range of stakeholders involved, to balance expertise and  
26  
27 experience. Each small group was guided by a Hopkins van Mil facilitator.

28  
29  
30 The three-hour workshop was divided into three parts with a final plenary session.  
31  
32 Throughout the workshop participants were asked to justify their choices, and reveal the  
33  
34 values and reasoning behind their prioritisation. Important questions were defined as those  
35  
36 that would have the most impact if answered by research. In the first session, each group  
37  
38 was asked to debate what they considered to be the four most and least important research  
39  
40 questions from the 30 questions. In session 1 the highest and lowest questions were  
41  
42 determined.

43  
44  
45 In session 2 facilitators shared a list of questions that were of medium importance, i.e. not  
46  
47 the highest or lowest priority questions determined in session 1. Facilitators asked  
48  
49 participants to categorise these as either; 1) a priority, 2) low priority, 3) not a priority. This  
50  
51  
52  
53  
54  
55  
56  
57  
58  
59  
60

1  
2  
3 was determined by debate, discussion, and justification of the participants' reasoning. The  
4  
5  
6 facilitator moved the questions around on the shared slide. The highest ranking questions  
7  
8 from session 1 and session 2 were brought together. By the end of the second session each  
9  
10 group had a list of top 14 questions ranked in order of importance.  
11

12  
13 The facilitators then met to combine the top 14 questions from all the small groups, this led  
14  
15 to one list of 16 questions. In the third session of the workshop this combined list of 16  
16  
17 questions was shared with the individual groups for debate. Here the groups were asked to  
18  
19 determine and rank their final list of 10 research questions. Facilitators guided this final  
20  
21 prioritisation stage by asking groups to focus on questions that would have the highest  
22  
23 impact if taken forward as a research question. The groups then came together in a final  
24  
25 plenary session and the top two questions from each group were shared with the larger  
26  
27 group. After an amalgamation of the top 2 questions from each group and invariable  
28  
29 overlap, the third and fourth questions from each group were added to produce a final list  
30  
31 of the top 10 questions.  
32  
33  
34  
35  
36  
37  
38  
39

## 40 Results

41 This three-stage prioritisation project involved a diverse group of stakeholders in prioritising  
42  
43 a list of top 10 unanswered research questions for obesity and weight-related research,  
44  
45 which are presented here and at: <https://www.phc.ox.ac.uk/research/participate/power>  
46  
47  
48

### 49 Survey 1: Gathering questions and identifying those unanswered

50  
51  
52 Demographics of respondents and questions gathered:  
53

54  
55 Survey 1 received 278 responses (Table 1), yielding 941 original questions (Figure 1 &  
56  
57 Supplementary Table 2). Demographic information collected during the survey indicated a  
58  
59  
60

1  
2  
3 diverse range of ages, ethnicities, and stakeholder groups among survey respondents. 37%  
4  
5 of respondents had lived experience of obesity, and 80% were educated to degree level or  
6  
7 above (Table 1).  
8  
9  
10  
11  
12  
13  
14  
15  
16  
17  
18  
19  
20  
21  
22  
23  
24  
25  
26  
27  
28  
29  
30  
31  
32  
33  
34  
35  
36  
37  
38  
39  
40  
41  
42  
43  
44  
45  
46  
47  
48  
49  
50  
51  
52  
53  
54  
55  
56  
57  
58  
59  
60

For peer review only

**Table 1:** Demographic characteristics for respondents to survey 1 and survey 2

|                              | <b>Survey 1</b> | <b>Survey 2</b> |
|------------------------------|-----------------|-----------------|
|                              | N=278           | N=405           |
|                              | n (%)           | n (%)           |
| <b>Age</b>                   |                 |                 |
| <18                          | 0 (0)           | 1 (0.2)         |
| 18-29                        | 38 (13.7)       | 39 (9.6)        |
| 30-39                        | 47 (16.9)       | 54 (13.3)       |
| 40-49                        | 73 (26.3)       | 81 (20.0)       |
| 50-59                        | 69 (24.8)       | 79 (19.5)       |
| 60-69                        | 40 (14.4)       | 88 (21.2)       |
| ≥70                          | 8 (2.9)         | 59 (14.6)       |
| Prefer not to say            | 3 (1.1)         | 6 (1.5)         |
| <b>Gender</b>                |                 |                 |
| Female                       | 210 (75.5)      | 284 (70.1)      |
| Male                         | 61 (21.9)       | 115 (28.4)      |
| Non-binary                   | NA              | 2 (0.5)         |
| Other                        | 5 (1.8)         | 1 (0.2)         |
| I prefer not to say          | 2 (0.7)         | 3 (0.7)         |
| <b>Place of residence</b>    |                 |                 |
| England                      | 245(88.1)       | 361 (89.1)      |
| Scotland                     | 14 (5)          | 15 (3.7)        |
| Wales                        | 8 (2.9)         | 6 (1.5)         |
| N. Ireland                   | 4 (1.4)         | 4 (1.0)         |
| Not in UK                    | 4 (1.4)         | 13 (3.2)        |
| I prefer not to say          | 3 (1.1)         | 6 (1.5)         |
| <b>Ethnicity</b>             |                 |                 |
| White/ White British         | 236 (84.9)      | 187 (85.4)      |
| Mixed/ Multiple ethnic group | 11 (4)          | 5 (2.3)         |
| Asian/ Asian British         | 15 (5.4)        | 11 (5)          |
| Black/ Black British         | 4 (1.4)         | 5 (2.3)         |

|                     |         |         |
|---------------------|---------|---------|
| Other               | 3 (1.1) | 5 (2.3) |
| I prefer not to say | 9 (3.2) | 6 (2.8) |

**Education**

|                                   |            |            |
|-----------------------------------|------------|------------|
| School (pre-GCSE)                 | 4 (1.4)    | 3 (1.4)    |
| School (up to GCSE or equivalent) | 12 (4.3)   | 14 (6.4)   |
| School (A levels or equivalent)   | 9 (3.2)    | 11 (5.0)   |
| Higher education (e.g. college)   | 23 (8.3)   | 24 (11.0)  |
| Degree level or higher            | 223 (80.2) | 161 (73.5) |
| Other                             | 3 (1.1)    | 2 (0.91)   |
| I prefer not to say               | 4 (1.4)    | 4 (1.8)    |
| Total for education question      | 278        | 219*       |

**Lived experience of overweight**

|                     |            |            |
|---------------------|------------|------------|
| Yes                 | 103 (37.1) | 248 (61.2) |
| No                  | 164 (59.0) | 140 (34.6) |
| Other               | 11 (4.0)   | 11 (2.7)   |
| I prefer not to say | NA         | 6 (1.5)    |

**Stakeholder category \*\***

|                                                    |            |            |
|----------------------------------------------------|------------|------------|
| Healthcare professional                            | 22 (8.6)   | 36 (8.9)   |
| Public health professional                         | 17 (6.7)   | 26 (6.4)   |
| Researcher (general)                               | 32 (12.5)  | 33 (8.1)   |
| Researcher (weight/ obesity research)              | 49 (19.14) | 41 (10.1)  |
| Work in the charity sector                         | 14 (5.5)   | 18 (4.4)   |
| Work with a group representing people with obesity | 5 (2.0)    | 5 (1.2)    |
| Policymaker or Commissioner of healthcare services | 1 (0.4)    | 6 (1.5)    |
| Professional working outside of healthcare         | Not asked  | 12 (3.0)   |
| General interest (survey 1).                       | 103 (40.2) | 176 (43.5) |
| Responding in a personal capacity (survey 2)       |            |            |
| Other or I prefer not to say                       | 13 (5.1)   | 52 (12.8)  |

\* This question was not included for the first 186 respondents in survey 2

\*\*Stakeholder category: in survey 1 participants were able to describe themselves as belonging to more than one category.

Categories selected presented. Lived experience was included in this section.

### Identifying unanswered questions:

The 941 questions were grouped by topic. We excluded 49 (5.2%) questions as already answered, and 149, (15.8%) as out of scope. (Figure 1, Supplementary Table 2). The remaining 743 questions were rephrased following the process above to yield 149 individual research questions (Supplementary Table 3). These questions covered a range of topics (Figure 2). Of the 941 submitted questions most questions concerned: prevention and intervention; mental health; illness, disease and health; and food industry, policy and environment (Figure 2 a). Of the 149 grouped research questions taken forward 'illness, disease & health' and 'metabolism, physiology & appetite', were the most popular categories and fewer questions concerned age of onset and duration of obesity (Figure 2 b).

### **Survey 2: Prioritising unanswered research questions**

Survey 2 received 405 responses; 61% of respondents reported lived experience with obesity, and 74% held an education to degree level or above (Table 1). The 149 questions to be taken forward from survey 1 were divided into three batches of up to 50 questions, and randomly assigned to respondent's survey 2. Each question was rated in order of importance, by a mean of 115 people (SD 9.7) (Supplementary Table 3).

### **Workshop: Determining the top 10 research priorities**

We invited 64 stakeholders, 39 people confirmed their acceptance and one person dropped out on the day. The 38 attendees (20 female, 18 male) were made up of 4 public members, 8 participants from related organisations, 13 researchers, 7 policy makers and 6 healthcare professionals. One person asked for the question on the role of the gut microbiome to be included from the list of 10 extra questions. At the workshop 31 questions were debated in

1  
2  
3 small groups. In the first session the groups sorted questions into highest and lowest  
4  
5 priority. In the second session the top 14 questions were determined by all groups except  
6  
7 one that determined their top 10 and another that grouped questions as high medium and  
8  
9 low priority. The facilitators combined the lists from all the groups into a list of 16 as many  
10  
11 of the top 14 from each group overlapped. In the third session participants ranked the 16  
12  
13 questions into a top 10 list. The top 2 from all these lists was shared at a final plenary  
14  
15 session. Consolidation of the top two questions and the questions ranked third and fourth  
16  
17 resulted in 11 unique research questions by the end of the workshop. Upon analysis of  
18  
19 recordings of each group's discussion, multiple participants noted that two questions in the  
20  
21 11 that were similar in meaning. We therefore combined these two questions (concerning  
22  
23 food choice, appetite and the brain's control of food intake) post hoc to produce a final list  
24  
25 of the top 10 research questions (Table 2). There was consistency between the top  
26  
27 questions in this final list produced from the workshop, and popular questions submitted in  
28  
29 the surveys as indicated by number of people asking each question (Supplementary Table  
30  
31 3). Five of the final top 10 questions were among the 10 most frequently submitted  
32  
33 questions in survey 1. Seven of the final questions were in the top 10 from survey 2, ranked  
34  
35 by mean score. The final list of the top 10 priorities are not listed in order of priority (Table  
36  
37 2).  
38  
39  
40  
41  
42  
43  
44  
45  
46  
47  
48  
49  
50  
51  
52  
53  
54  
55  
56  
57  
58  
59  
60

**Table 2:** Final Top 10 Priority Research Questions<sup>1</sup>

|                                                                                                                                                                                                                                                                                                                                                                                                                                                                                                                                                                                                                |                                                                                                                                                                                                                                                                                                                                                                                                                                                                                                                                                                                                                                                                                                                                                                                                                                                                                                                                                                                                                                                                                                                                                                                                                                                                                                                                                                                                                                                                                                                                                                                                                                                                                                                                                                                                                                                                                                                                                                                                                                                                                                                                                                                                                                                                                                                                                                                                                                                                                                                                                                                                                                                                                                                                                                                                                                                                                                                                                                                                                                                                                                                                                                                                                                                                                                                        |
|----------------------------------------------------------------------------------------------------------------------------------------------------------------------------------------------------------------------------------------------------------------------------------------------------------------------------------------------------------------------------------------------------------------------------------------------------------------------------------------------------------------------------------------------------------------------------------------------------------------|------------------------------------------------------------------------------------------------------------------------------------------------------------------------------------------------------------------------------------------------------------------------------------------------------------------------------------------------------------------------------------------------------------------------------------------------------------------------------------------------------------------------------------------------------------------------------------------------------------------------------------------------------------------------------------------------------------------------------------------------------------------------------------------------------------------------------------------------------------------------------------------------------------------------------------------------------------------------------------------------------------------------------------------------------------------------------------------------------------------------------------------------------------------------------------------------------------------------------------------------------------------------------------------------------------------------------------------------------------------------------------------------------------------------------------------------------------------------------------------------------------------------------------------------------------------------------------------------------------------------------------------------------------------------------------------------------------------------------------------------------------------------------------------------------------------------------------------------------------------------------------------------------------------------------------------------------------------------------------------------------------------------------------------------------------------------------------------------------------------------------------------------------------------------------------------------------------------------------------------------------------------------------------------------------------------------------------------------------------------------------------------------------------------------------------------------------------------------------------------------------------------------------------------------------------------------------------------------------------------------------------------------------------------------------------------------------------------------------------------------------------------------------------------------------------------------------------------------------------------------------------------------------------------------------------------------------------------------------------------------------------------------------------------------------------------------------------------------------------------------------------------------------------------------------------------------------------------------------------------------------------------------------------------------------------------------|
| <p>1</p> <p>2</p> <p>3</p> <p>4</p> <p>5</p> <p>6</p> <p>7</p> <p>8</p> <p>9</p> <p>10</p> <p>11</p> <p>12</p> <p>13</p> <p>14</p> <p>15</p> <p>16</p> <p>17</p> <p>18</p> <p>19</p> <p>20</p> <p>21</p> <p>22</p> <p>23</p> <p>24</p> <p>25</p> <p>26</p> <p>27</p> <p>28</p> <p>29</p> <p>30</p> <p>31</p> <p>32</p> <p>33</p> <p>34</p> <p>35</p> <p>36</p> <p>37</p> <p>38</p> <p>39</p> <p>40</p> <p>41</p> <p>42</p> <p>43</p> <p>44</p> <p>45</p> <p>46</p> <p>47</p> <p>48</p> <p>49</p> <p>50</p> <p>51</p> <p>52</p> <p>53</p> <p>54</p> <p>55</p> <p>56</p> <p>57</p> <p>58</p> <p>59</p> <p>60</p> | <p>What are the most effective methods for weight maintenance following weight loss? What are the effective components of treatments/ programmes incorporating a behavioural element? How many and in what combination are most effective? What is the optimal duration of these programmes?</p> <p>What are the most effective methods for weight loss? What are the effective components of treatments/ programmes incorporating a behavioural element? How many and in what combination are most effective? What is the optimal duration of these programmes?</p> <p>What is the most effective and cost- effective mix of population/public health and individual interventions to tackle obesity?</p> <p>Do interventions that target the ‘obesogenic environment’, such as community interventions, urban planning, placement of fast-food outlets or workplace policies, affect population mean weight and do these effects differ by baseline weight status (underweight, healthy weight, overweight, obesity)? Which interventions are most effective at reaching low socio-economic groups?</p> <p>Do interventions (e.g. nutrition education and physical activity) in pre-school, primary school and secondary school reduce children’s risk of unhealthy weight gain and, if so, how do they act? Does the effect of such interventions differ by social and cultural groups?</p> <p>What changes in supermarkets or the wider food industry are effective in promoting healthier diets? Does changing labelling and/or packaging on foods affect purchasing, consumption, and body weight?</p> <p>What is the cost and affordability of a healthy balanced diet? How can we make healthier foods more affordable? How can we improve access to healthy diets for social and cultural groups, such as people in poverty, people in inner cities, or young and older people?</p> <p>How do demographic, social and cultural factors (e.g. age, socioeconomic status, lifestyle, environment, psychosocial functioning) affect weight status, weight gain and regional fat distribution? What are the mechanisms involved? Does the effectiveness of weight loss methods depend on social and cultural background and, if so, can the effects be made more equitable? Are weight loss methods tailored to people’s background more effective for weight loss and weight maintenance than general methods?</p> <p>How accurate are existing models of health consequences of excess weight and the impact of weight loss? Which assumptions are critical in determining the long-term effectiveness and cost effectiveness of weight loss interventions? What do these models predict is the impact of weight loss interventions on health and disease incidence and the cost-effectiveness of such interventions? What is the impact of weight regain on the incidence of disease and cost-effectiveness of weight loss interventions?</p> <p>What are the drivers of food choice, appetite, and intake and do variations in these drives explain who develops obesity and who does not? How does the brain control food intake and can we use these mechanism to aid weight loss? What are the brain responses (neural correlates) in response to food during weight loss and following weight regain?</p> |
|----------------------------------------------------------------------------------------------------------------------------------------------------------------------------------------------------------------------------------------------------------------------------------------------------------------------------------------------------------------------------------------------------------------------------------------------------------------------------------------------------------------------------------------------------------------------------------------------------------------|------------------------------------------------------------------------------------------------------------------------------------------------------------------------------------------------------------------------------------------------------------------------------------------------------------------------------------------------------------------------------------------------------------------------------------------------------------------------------------------------------------------------------------------------------------------------------------------------------------------------------------------------------------------------------------------------------------------------------------------------------------------------------------------------------------------------------------------------------------------------------------------------------------------------------------------------------------------------------------------------------------------------------------------------------------------------------------------------------------------------------------------------------------------------------------------------------------------------------------------------------------------------------------------------------------------------------------------------------------------------------------------------------------------------------------------------------------------------------------------------------------------------------------------------------------------------------------------------------------------------------------------------------------------------------------------------------------------------------------------------------------------------------------------------------------------------------------------------------------------------------------------------------------------------------------------------------------------------------------------------------------------------------------------------------------------------------------------------------------------------------------------------------------------------------------------------------------------------------------------------------------------------------------------------------------------------------------------------------------------------------------------------------------------------------------------------------------------------------------------------------------------------------------------------------------------------------------------------------------------------------------------------------------------------------------------------------------------------------------------------------------------------------------------------------------------------------------------------------------------------------------------------------------------------------------------------------------------------------------------------------------------------------------------------------------------------------------------------------------------------------------------------------------------------------------------------------------------------------------------------------------------------------------------------------------------------|

<sup>1</sup> Footnote to Table 2: These questions are in no particular order, i.e. not in order of importance.



## Discussion

### Summary of findings

Our priority setting exercise identified the top 10 research questions that stakeholders in the field, and those with an interest overweight and obesity, believe to be the key priorities to advance obesity and weight-related research. In two online surveys and a workshop, we collated nearly 1000 questions, and guided participants in a structured and systematic prioritisation process to reach the final list of 10 (Table 2). These questions cover a wide spectrum of areas, and if answered by research, would generate knowledge applicable for individuals, health care, public health, and policy.

### Strengths and limitations

The main strength of this project was the successful collaboration between a diverse range of stakeholder groups, though it was not without its challenges. Our stakeholders included patients, members of the public, clinicians, charities, researchers and policymakers connected to the field. Identifying the most appropriate group for a condition where a third of the adult population are clinically obese and more than 60% are overweight, while at the same time, considering how to prevent the condition developing which is relevant to the whole population, resulted in the inclusion of both patients and members of the public. Members of the public naturally included some people without lived experience of overweight or obesity, though it seems unlikely that they would not be aware of family members, and friends who are affected, and they may become affected themselves, justifying their inclusion in this prioritisation process. To have found consistency in the

1  
2  
3 questions being posed throughout the entire process by a variety of individuals bringing  
4  
5 different experience and expertise to a common area of focus, supports the validity of the  
6  
7 resulting top 10 questions. The majority of survey respondents and workshop participants  
8  
9 appear to be highly educated. Nonetheless there was evidence of an awareness of the need  
10  
11 for interventions to help reduce inequalities and the top 10 priorities include questions on  
12  
13 social determinants of health like low-socioeconomic status and cultural factors. We  
14  
15 commissioned third-party, impartial facilitators to guide the workshop without input from  
16  
17 the research team, so as to not inadvertently sway the prioritisation of questions being  
18  
19 considered in each session. Additionally, the number of questions submitted and finally  
20  
21 categorised is in line with similar priority setting exercises in health research, using an  
22  
23 analogous process set out by the James Lind Alliance, with a comparable number of  
24  
25 stakeholders involved<sup>13 14</sup>.  
26  
27  
28  
29  
30  
31  
32

33 There are limitations that we identified and strived to address throughout the stages of the  
34  
35 process. To begin with survey 1, we deemed that 5.2% of all questions submitted were  
36  
37 already answered by empirical evidence. We assessed this through a thorough search of the  
38  
39 literature to identify systematic reviews, clinical and public health guidelines, and high-  
40  
41 quality primary studies in the form of randomised controlled trials. Although this  
42  
43 necessitated some subjective judgement, we ensured that all decisions were made in  
44  
45 duplicate, and discrepancies were resolved by a third researcher. Our confidence in the  
46  
47 categorisation of answered versus unanswered questions is strengthened by consensus  
48  
49 among stakeholders involved, some of whom were researchers with expertise in the  
50  
51 question areas being considered. That 5.2% of the submitted questions were considered  
52  
53 answered indicates that research may not being adequately communicated in these areas.  
54  
55  
56  
57  
58  
59  
60 This could be addressed by improved or targeted communication.

1  
2  
3 In survey 2, we asked participants to rate questions on a scale of 1-10, but found that  
4 participants were disinclined to use the full range. Many questions had means between 6  
5 and 8 meaning that differences in the scoring were subtle. Future work could consider using  
6 a condensed scale to perhaps mirror ratings that people are more familiar with (e.g. 5-point  
7 ratings seen in 5-star reviews, or 4-point grading of evidence<sup>15</sup>) however unless people used  
8 the top and the bottom of the scale a condensed scale could lead to questions being rated  
9 as even more similar. In regards to the workshop, while facilitators had standardised  
10 methods for the structure of the small group discussion, one group did not rank their  
11 questions during the workshop, and instead batched them as high, medium and low-  
12 priority. This made no difference to the outcome, as the group's top three high-priority  
13 questions were included in the final priority list across all groups.  
14  
15  
16  
17  
18  
19  
20  
21  
22  
23  
24  
25  
26  
27  
28  
29

30 An additional limitation of the workshop was the shift to a virtual versus in-person meeting  
31 due to local COVID-19 restrictions, which limited the length of the discussions. Upon  
32 analysis of the recordings from each group's consultations, it was clear that the virtual  
33 setting maintained a clean discussion where moderators were clearly able to garner input  
34 from each participant without anyone talking over-another, as may have been the case in an  
35 in-person discussion. It was possible to rank the top 10 in the small groups in the workshop,  
36 however it was harder to achieve this with 38 participants in the plenary sessions so we did  
37 not seek to order the final 10 priorities. Lastly, obesity is a worldwide problem calling for a  
38 global research response, but we only involved UK-based stakeholders. It is likely that the  
39 process identified questions that are generalizable outside of the UK, but it is unlikely that  
40 this process fully captured priorities that may be relevant to low income countries or  
41 countries with a low prevalence of overweight and obesity.  
42  
43  
44  
45  
46  
47  
48  
49  
50  
51  
52  
53  
54  
55  
56  
57  
58  
59  
60

## Implications for research and policy

The main implication of this work is for the top 10 priorities for obesity and weight-related research to be considered by funding bodies concerned with advancing the field. Similar priority setting work in other areas of health research have resulted in research calls that reflect priorities identified by stakeholders<sup>16</sup>. Along with the top 10 questions, this project identified a further 139 unanswered questions that may also serve as a resource for researchers trying to match gaps in the evidence with perceived needs.

We make two recommendations for future priority setting exercises in this area based on what we learned from the process. The first would be to limit the focus to a pre-specified area in the field. The breadth of topic areas produced by the large number of stakeholders engaged was onerous to process, and resulted in high level areas for research. Future exercises may wish to restrict their scope to a certain area of research, such as treatment for people living with obesity, or population-wide prevention strategies to allow more granular questions to emerge. The second would be to incorporate work to boost awareness of the existing research evidence for common questions that were submitted, but deemed to be answered. Questions that were commonly submitted, but already answered and therefore excluded from progressing through the prioritisation process are telling of a discrepancy between published research and knowledge dissemination.

## Conclusion

1  
2  
3 We have identified 10 priorities that cover: the role of the obesogenic environment;  
4  
5 effective weight loss and maintenance; prevention in children; effective prevention and  
6  
7 treatment policies; the role of the food industry; access to and affordability of healthy diets;  
8  
9 the sociocultural factors associated with weight; the biology of appetite and food intake;  
10  
11 and long-term health modelling. Research funders may want to prioritise these questions  
12  
13 when considering research proposals, or commissioning programmes of research to answer  
14  
15 these key questions.  
16  
17  
18  
19  
20  
21  
22  
23  
24  
25  
26  
27  
28  
29  
30  
31  
32  
33  
34  
35  
36  
37  
38  
39  
40  
41  
42  
43  
44  
45  
46  
47  
48  
49  
50  
51  
52  
53  
54  
55  
56  
57  
58  
59  
60

## Contributions

NMA, PA and SAJ conceived the concept. ARB, LG and NMA were responsible for collecting and collating data with guidance from PS and BC. ARB, LG, AH and NMA produced an initial draft of the manuscript, PA, SAJ, PS and BC provided comments and edited the original draft. All authors reviewed and approved the final submitted version of the manuscript.

## Ethical approval statement

This study was approved by the University of Oxford Medical Sciences Inter-Divisional Research Ethics Committee (Ref: R6721/RE003). Informed consent was implied from survey respondents and all participants in the online workshop provided informed consent to participate consent prior to the workshop.

## Competing interests

NA, PA, and SAJ led an investigator-initiated study funded by Cambridge Weight Plan. PA has spoken at two symposia organised by the Royal College of General Practitioners that were funded by Novo Nordisk. None of these activities led to personal payment.

ARB, LG, AH, PS and BC have no interests to declare.

## Funding

The study was funded by the National Institute for Health Research (NIHR) Oxford and Thames Valley Applied Research Collaboration. NMA, PA and SAJ are supported by the NIHR Oxford Biomedical Research Centre. PA and SAJ are NIHR senior investigators. The funders had no role in study design, data collection, data analysis, data interpretation, or writing of the report. The views are those expressed by the authors and not necessarily those of the NHS, NIHR, or Department of Health.

## Data sharing agreement

Requests can be made for the deidentified participant level data collected during this study from the Nuffield Department of Primary Care hosted Datasets Independent Scientific Committee (PrimDISC): [primdisc@phc.ox.ac.uk](mailto:primdisc@phc.ox.ac.uk) upon approval of a protocol, statistical analysis plan and the signing of a suitable data sharing agreement.

## Acknowledgements

We would like to thank Nicola Lindson and Jamie Hartmann Boyce for help and guidance and David Dyson, Gavin Hubbard, Alice Crouch and Dan Richard-Doran for support with the surveys and webpages, Michaela Noriek for help with public engagement, Goher Ayman for helpful advice We also want to thank everyone who worked on the POWER project including all the members of the health behaviours team who helped us with questions from survey 1. Elizabeth Morris, Carmen Piernas-Sanchez, Dimitrios Koutoukidis, Tanisha Spratt, Anne Ferrey, and Jenny Brooks. We would like to thank all the people who took the surveys and provided us with their original questions, everyone who ranked the questions and to all the workshop participants and the many organisations that distributed the surveys on our behalf. We are grateful to the workshop participants for giving us their time. We would like to thank Hopkins Van Mil for conducting the workshop.

1  
2  
3 **Figure 1:** Flow diagram for the priority research questions  
4

5 **Figure 2:** a) 941 submitted questions by topic; b) 149 research questions grouped by topic.  
6  
7  
8  
9  
10  
11  
12  
13  
14  
15  
16  
17  
18  
19  
20  
21  
22  
23  
24  
25  
26  
27  
28  
29  
30  
31  
32  
33  
34  
35  
36  
37  
38  
39  
40  
41  
42  
43  
44  
45  
46  
47  
48  
49  
50  
51  
52  
53  
54  
55  
56  
57  
58  
59  
60

For peer review only



## REFERENCES

1. NHS Digital. Health Survey for England 2019 2020 [updated 15 December 2020. Available from: <https://digital.nhs.uk/data-and-information/publications/statistical/health-survey-for-england>.
2. World Health Organization. Obesity and overweight 2020 [updated 1 April 2020. Available from: <https://www.who.int/news-room/fact-sheets/detail/obesity-and-overweight>.
3. Caballero B. The Global Epidemic of Obesity: An Overview. *Epidemiologic Reviews* 2007;29(1):1-5. doi: 10.1093/epirev/mxm012
4. Jaacks LM, Vandevijvere S, Pan A, McGowan CJ, Wallace C, Imamura F, Mozaffarian D, Swinburn B, Ezzati M. The obesity transition: stages of the global epidemic. *Lancet Diabetes Endocrinol* 2019;7(3):231-40. doi: 10.1016/s2213-8587(19)30026-9 [published Online First: 2019/02/02]
5. PHE. Health matters: obesity and the food environment 2017 [Available from: <https://www.gov.uk/government/publications/health-matters-obesity-and-the-food-environment/health-matters-obesity-and-the-food-environment--2#:~:text=More%20broadly%2C%20obesity%20has%20a,%C2%A349.9%20billion%20per%20year>.
6. Holmes J. Tackling obesity: the role of the NHS in a whole-system approach, 2021.
7. Alliance JL. The James Lind Alliance Guidebook 2021 [updated March 2021. Version 10:[Available from: <https://www.jla.nihr.ac.uk/jla-guidebook/downloads/JLA-Guidebook-Version-10-March-2021.pdf> accessed 17 March 2021.
8. Chalmers I, Atkinson P, Fenton M, Firkins L, Crowe S, Cowan K. Tackling treatment uncertainties together: the evolution of the James Lind Initiative, 2003-2013. *Journal of the Royal Society of Medicine* 2013;106(12):482-91. doi: 10.1177/0141076813493063
9. Nygaard A, Halvorsrud L, Linnerud S, Grov EK, Bergland A. The James Lind Alliance process approach: scoping review. *BMJ Open* 2019;9(8):e027473. doi: 10.1136/bmjopen-2018-027473 [published Online First: 2019/09/02]
10. Lindson N, Richards-Doran D, Heath L, Hartmann-Boyce J, team Ct. Setting research priorities in tobacco control: a stakeholder engagement project. *Addiction* 2017 doi: 10.1111/add.13940
11. Viergever RF, Olifson S, Ghaffar A, Terry RF. A checklist for health research priority setting: nine common themes of good practice. *Health Res Policy Syst* 2010;8:36. doi: 10.1186/1478-4505-8-36
12. Hopkins Van Mil [Available from: <http://www.hopkinsvanmil.co.uk/>.
13. Goodridge D, Duncan B, Cowan K, Fang S, Fenton M, Parkalub D, Peters J, Skomro R, Skrapek C, Ulmer K. Top 10 research priorities for people with obstructive sleep apnoea, families and clinicians: James Lind Alliance Priority Setting Partnership. *Thorax* 2022:thoraxjnl-2021-218154. doi: 10.1136/thoraxjnl-2021-218154
14. Ayman G, Strachan JA, McLennan N, Malouf R, Lowe-Zinola J, Magdi F, Roberts N, Alderdice F, Berneantu I, Breslin N, Byrne C, Carnell S, Churchill D, Grisoni J, Hirst JE, Morris A, Murphy HR, O'Brien J, Schmutz C, Shah K, Singal AS, Strachan MWJ, Cowan K, Knight M. The top 10 research priorities in diabetes and pregnancy according to women, support networks and healthcare professionals. *Diabetic Medicine* 2021;38(8):e14588. doi: <https://doi.org/10.1111/dme.14588>
15. Schünemann HJ, Best D, Vist G, Oxman AD. Letters, numbers, symbols and words: how to communicate grades of evidence and recommendations. *Canadian Medical Association Journal* 2003;169(7):677.
16. Nasser MC, S. What is research priority setting and what you need to do before starting? : Cochrane Research Collaboration; [Available from: <https://methods.cochrane.org/prioritysetting/resources> accessed 17 March 2021.

1  
2  
3  
4  
5  
6  
7  
8  
9  
10  
11  
12  
13  
14  
15  
16  
17  
18  
19  
20  
21  
22  
23  
24  
25  
26  
27  
28  
29  
30  
31  
32  
33  
34  
35  
36  
37  
38  
39  
40  
41  
42  
43  
44  
45  
46  
47  
48  
49  
50  
51  
52  
53  
54  
55  
56  
57  
58  
59  
60

For peer review only

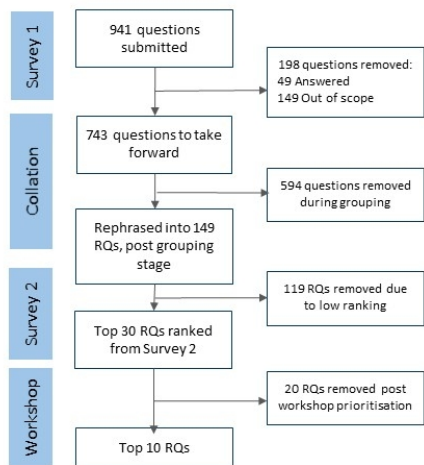

Figure 1: Flow diagram for the priority setting research questions

254x142mm (96 x 96 DPI)

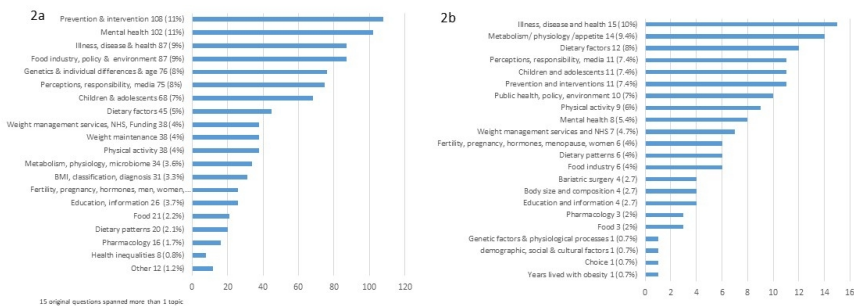

Figure 2: a) 941 submitted questions grouped by topic. b) 149 research questions grouped by topic

338x190mm (96 x 96 DPI)

## Supplementary Material

**Supplementary Table 1: Organisations contacted to participate or distribute survey 1**

**Supplementary Table 2: Full list of 941 original questions submitted in survey 1**

**Supplementary Table 3: 149 Unanswered re-phrased questions in rank order from survey 2**

**Supplementary Table 4: Research questions for workshop**

**Supplementary Table 1: Organisations contacted to participate or distribute survey 1**

| Organisation contacted for distribution of survey 1 |                                                       |
|-----------------------------------------------------|-------------------------------------------------------|
| DART                                                | HomeStart                                             |
| First Steps Nutrition                               | Oxford City Council                                   |
| Food Foundation                                     | National Obesity Forum                                |
| Good Food Oxford                                    | Obesity Action Campaign                               |
| Guys and St Thomas'                                 | HealthWatch Oxford                                    |
| Local Government Association                        | Oxford Food Bank                                      |
| NHS England                                         | The All-Party Parliamentary Group on Obesity          |
| Obesity Empowerment Network                         | Research For the Future                               |
| Public Health England                               | Activate Learning                                     |
| SUSTAIN                                             | Manor Surgery in Oxford                               |
| Obesity UK                                          | Consultant in public health                           |
| Weight Watchers                                     | Oxford Brookes                                        |
| ASO                                                 | Kings College London, THIS institute Research fellow. |
| British Heart Foundation                            | Links with Obesity APPG                               |
| Centre for Food Policy                              | Department of Health & Social Care                    |
| Diabetes UK                                         | Public Health Registrars                              |
| Eating Better Alliance                              | Commissioner of Healthcare Services                   |
| RSPH                                                | Oxford BRC PPI                                        |
| Weight concern                                      | <u>Newsletters</u>                                    |
| British Obesity Society                             | Department of PCHS                                    |
| Obesity Policy Research Unit                        | Oxford Martin School                                  |
| UK SBM                                              | Blue Print                                            |
| GP Nutrition Group                                  | MedSci Division                                       |
| BDA                                                 | Involvement Matters                                   |
| LighterLife UKLtd                                   | Weight Management Panel                               |
| BritMums                                            |                                                       |
| HOOP UK                                             |                                                       |

**Supplementary Table 2: Full list of 941 original questions submitted in survey 1. 743 unanswered, 49 answered, 149 out of scope.**

| No. of questions | The 743 unanswered questions                                                                                                                                                                                                                                                      |
|------------------|-----------------------------------------------------------------------------------------------------------------------------------------------------------------------------------------------------------------------------------------------------------------------------------|
| 1                | What are the underlying genetic and physiological causes of obesity?                                                                                                                                                                                                              |
| 2                | Further research on deepening understanding of factors which influence obesity on an individual basis (psychological, biological, genetic, etc.).                                                                                                                                 |
| 3                | Connection between underlying health issues/genes/metabolic rates that may cause Obesity.                                                                                                                                                                                         |
| 4                | How much is obesity controlled by genetics, physiology etc. as opposed to a person's free will?                                                                                                                                                                                   |
| 5                | What are the underlying mechanisms for the journey to Obesity?                                                                                                                                                                                                                    |
| 6                | What factors are involved in weight related concerns - i.e. psychological/ psychosocial/ physical/ environmental? And which of these play a bigger part in obesity?                                                                                                               |
| 7                | What are the social factors that contribute to obesity- and how can they be supported?                                                                                                                                                                                            |
| 8                | What are the social* and environmental determinants of obesity/body-weight? *this includes how social policies influence incidence                                                                                                                                                |
| 9                | How do we tackle the upstream determinants of diet and physical activity related to obesity?                                                                                                                                                                                      |
| 10               | Fully understanding the reasons for obesity and factors with achieving weight loss.                                                                                                                                                                                               |
| 11               | What causes you to be obese or what do you think causes obesity?                                                                                                                                                                                                                  |
| 12               | What factors have influenced my weight gain?                                                                                                                                                                                                                                      |
| 13               | Why do we gain weight?                                                                                                                                                                                                                                                            |
| 14               | What is the root cause of obesity and T2 diabetes?                                                                                                                                                                                                                                |
| 15               | What other than food affects your weight gain/loss?                                                                                                                                                                                                                               |
| 16               | What causes Obesity                                                                                                                                                                                                                                                               |
| 17               | How do genetics affect obesity?                                                                                                                                                                                                                                                   |
| 18               | My family has hereditary obesity issues. Will that affect me certainly?                                                                                                                                                                                                           |
| 19               | Why do people become obese? Is it genetic? Is it just over eating?                                                                                                                                                                                                                |
| 20               | What is the effect of genetics on body weight and on what BMI percentile somebody will fall in?                                                                                                                                                                                   |
| 21               | Research into is obesity passed from one from parents?                                                                                                                                                                                                                            |
| 22               | How can we combat the genetic component contributing to obesity- desire to eat/appetite, less a ability to feel satisfied with food, preference for high calorie food?                                                                                                            |
| 23               | Is obesity hereditary?                                                                                                                                                                                                                                                            |
| 24               | Is weight gain hereditary?                                                                                                                                                                                                                                                        |
| 25               | Is obesity hereditary?                                                                                                                                                                                                                                                            |
| 26               | I would like to know if genetics play a part.                                                                                                                                                                                                                                     |
| 27               | Is obesity genetic? Can anything be done to prevent it?                                                                                                                                                                                                                           |
| 28               | How true is the public belief that they are predisposed to be overweight - the broad sweep statement that genetic factors are to blame for a huge proportion of the weight issues observed                                                                                        |
| 29               | Do genetics play a big part in obesity?                                                                                                                                                                                                                                           |
| 30               | Are there inherited factors to obesity?                                                                                                                                                                                                                                           |
| 31               | Is obesity genetic                                                                                                                                                                                                                                                                |
| 32               | How big a role does genetics play in familial obesity?                                                                                                                                                                                                                            |
| 33               | Why can some people eat what they want yet others put on weight when they do the same                                                                                                                                                                                             |
| 34               | What are the direct effects / mechanisms of poverty in relation to obesity                                                                                                                                                                                                        |
| 35               | What are the impacts of poverty and socioeconomic status on health; on body weight; and on health related stigma? What policy decisions could effectively address and reduce the health disparity and life expectancy disparity between richer and poorer communities in Britain? |
| 36               | What are the key drivers in SES disparities regarding overweight/obesity?                                                                                                                                                                                                         |
| 37               | What is the relationship between poverty and obesity?                                                                                                                                                                                                                             |
| 38               | Why are people from a lower socio-economic background more likely to have overweight or to be obese?                                                                                                                                                                              |
| 39               | Is there a link with peoples income and them being overweight                                                                                                                                                                                                                     |
| 40               | Why is it that some people can eat what they like n not put on weight yet I only have to look at food and the scales go up.                                                                                                                                                       |
| 28               | How true is the public belief that they are predisposed to be overweight - the broad sweep statement that genetic factors are to blame for a huge proportion of the weight issues observed                                                                                        |
| 29               | Do genetics play a big part in obesity?                                                                                                                                                                                                                                           |
| 30               | 30. Are there inherited factors to obesity?                                                                                                                                                                                                                                       |
| 31               | Is obesity genetic                                                                                                                                                                                                                                                                |
| 32               | How big a role does genetics play in familial obesity?                                                                                                                                                                                                                            |
| 33               | Why can some people eat what they want yet others put on weight when they do the same                                                                                                                                                                                             |
| 34               | What are the direct effects / mechanisms of poverty in relation to obesity                                                                                                                                                                                                        |
| 35               | What are the impacts of poverty and socioeconomic status on health; on body weight; and on health related stigma? What policy decisions could effectively address and reduce the health disparity and life expectancy disparity between richer and poorer communities in Britain? |

|    |                                                                                                                                                                                                                                                                                                                                                                                                                                                                                          |
|----|------------------------------------------------------------------------------------------------------------------------------------------------------------------------------------------------------------------------------------------------------------------------------------------------------------------------------------------------------------------------------------------------------------------------------------------------------------------------------------------|
| 36 | What are the key drivers in SES disparities regarding overweight/obesity?                                                                                                                                                                                                                                                                                                                                                                                                                |
| 37 | What is the relationship between poverty and obesity?                                                                                                                                                                                                                                                                                                                                                                                                                                    |
| 38 | Why are people from a lower socio-economic background more likely to have overweight or to be obese?                                                                                                                                                                                                                                                                                                                                                                                     |
| 39 | Is there a link with people's income and them being overweight?                                                                                                                                                                                                                                                                                                                                                                                                                          |
| 40 | Why is it that some people can eat what they like and not put on weight yet I only have to look at food and the scales go up.                                                                                                                                                                                                                                                                                                                                                            |
| 41 | Why we falter/fail when we know weight loss is beneficial?                                                                                                                                                                                                                                                                                                                                                                                                                               |
| 42 | Why do some people gain weight when others do not when consuming similar calories?                                                                                                                                                                                                                                                                                                                                                                                                       |
| 43 | Why do some people get fat and others don't?                                                                                                                                                                                                                                                                                                                                                                                                                                             |
| 44 | Why do some people gain weight and others don't on the same diet?                                                                                                                                                                                                                                                                                                                                                                                                                        |
| 45 | Causes of obesity                                                                                                                                                                                                                                                                                                                                                                                                                                                                        |
| 46 | Why do some patients manage to keep significant weight loss off and yet others don't? Is it because of where their set point is? Is it genetic/epigenetic, or environmental or is it behavioural/psychological differences.                                                                                                                                                                                                                                                              |
| 47 | Who is most likely to recover from obesity, how and why?                                                                                                                                                                                                                                                                                                                                                                                                                                 |
| 48 | Why some people don't put on weight even eating unhealthy and excessive food?                                                                                                                                                                                                                                                                                                                                                                                                            |
| 49 | Why people in one family on much the same diet vary so much in weight?                                                                                                                                                                                                                                                                                                                                                                                                                   |
| 50 | Why can't some people lose weight?                                                                                                                                                                                                                                                                                                                                                                                                                                                       |
| 51 | are some people more prone to obesity, if so why?                                                                                                                                                                                                                                                                                                                                                                                                                                        |
| 52 | Which people with obesity will have a good response to behavioural weight management and which will need drugs or surgery to lose weight?                                                                                                                                                                                                                                                                                                                                                |
| 53 | What subgroups of people with obesity respond differently to different behavioural interventions?                                                                                                                                                                                                                                                                                                                                                                                        |
| 54 | Why is weight loss maintenance so hard? [I am a serial offender. Have lost 3stones+ at least 3 times in my life (one of those was 5st) and 2stones+ at least twice.]                                                                                                                                                                                                                                                                                                                     |
| 55 | Why is it so hard to keep weight off after you lose it? [I've dieted many times and lost a lot of weight.]                                                                                                                                                                                                                                                                                                                                                                               |
| 56 | Why do those empty fat cells shout 'feed me!' for at least 3 years after weight loss? Can anything be done to shut them up quicker??                                                                                                                                                                                                                                                                                                                                                     |
| 57 | Is the rise in obesity in the general public genetic or a learned pattern of behaviour?                                                                                                                                                                                                                                                                                                                                                                                                  |
| 58 | How much of an individual's weight is due to lifestyle factors, and how much is due to genetics?                                                                                                                                                                                                                                                                                                                                                                                         |
| 59 | How much of an effect is genetics and how much is environmental?                                                                                                                                                                                                                                                                                                                                                                                                                         |
| 60 | How much of an impact does the environment have on an individual's weight (e.g. family circumstances, education, SES, availability and access to food), and is there anything that can be done to change this (government policies, retailer interventions, school food policies)?                                                                                                                                                                                                       |
| 61 | Why are certain ethnicities at a disproportionate risk?                                                                                                                                                                                                                                                                                                                                                                                                                                  |
| 62 | Can we develop predictors of outcomes that can aid personalising treatment approaches?                                                                                                                                                                                                                                                                                                                                                                                                   |
| 63 | What are predictors of weight loss success for a specific dietary or physical activity intervention?                                                                                                                                                                                                                                                                                                                                                                                     |
| 64 | What leads to healthy and unhealthy weight gain in children?                                                                                                                                                                                                                                                                                                                                                                                                                             |
| 65 | How can we make interventions close rather than widen gaps in deprived populations?                                                                                                                                                                                                                                                                                                                                                                                                      |
| 66 | How do I find information and solutions that apply specifically to me?                                                                                                                                                                                                                                                                                                                                                                                                                   |
| 67 | Can we assess the cause of people's weight gain by simple questionnaire in order to target the most appropriate intervention? For example, those who are overweight would need different action, depending on whether the main contributor is a health condition (physical or mental), lack of exercise, financial constraints, making it difficult to buy healthy and filling food at low cost, busy lifestyle/lack of interest in cooking so that a lot of fast food is consumed, etc. |
| 68 | How to study dietary preference in obesity management?                                                                                                                                                                                                                                                                                                                                                                                                                                   |
| 69 | What are the most effective ways to help people who are already obese manage their weight back to health, on an individual basis?                                                                                                                                                                                                                                                                                                                                                        |
| 70 | Why can't I get support for weight issues tailor made to my life style?                                                                                                                                                                                                                                                                                                                                                                                                                  |
| 71 | Can we subtype obesity by cause and use this information to offer more targeted interventions to prevent or reduce obesity?                                                                                                                                                                                                                                                                                                                                                              |
| 72 | With all the research into microbiome and the genetic responses to exercise is there a role for a more individualised approach to weight management?                                                                                                                                                                                                                                                                                                                                     |
| 73 | For those who are found to have a genetic predisposition to obesity what can medicine do to prevent this undesirable outcome?                                                                                                                                                                                                                                                                                                                                                            |
| 74 | Why do some gain weight in certain places on the body and not others?                                                                                                                                                                                                                                                                                                                                                                                                                    |
| 75 | Why does the fat go from where it goes from and which areas will lose first, etc?                                                                                                                                                                                                                                                                                                                                                                                                        |
| 76 | What help would you like to see available, what help do you feel you need?                                                                                                                                                                                                                                                                                                                                                                                                               |
| 77 | What are the benefits versus harms/risks of weight loss using different weight loss methods or specific types/groups of people? [If you are genetically pre-disposed to obesity, are you better to live at a higher weight, if trying to reduce your weight leads to repeated weight cycling] (Second part of question used in another section)                                                                                                                                          |
| 78 | Are different diets right for different people? Or is simply that the best diet is the one you stick to? If some work better for certain types of person, how do you pick the one that would be best for you?                                                                                                                                                                                                                                                                            |
| 79 | How can we personalise weight management?                                                                                                                                                                                                                                                                                                                                                                                                                                                |
| 80 | How can we increase metabolism rate in old age, in order to decrease the chance of gaining weight?                                                                                                                                                                                                                                                                                                                                                                                       |
| 81 | Does age have an effect on weight gain?                                                                                                                                                                                                                                                                                                                                                                                                                                                  |
| 82 | What is leading cause?                                                                                                                                                                                                                                                                                                                                                                                                                                                                   |
| 83 | Are there times in people's lives that are associated with more weight gain and how can they prevent this?                                                                                                                                                                                                                                                                                                                                                                               |
| 84 | As we age, do we need to consider consuming less food?                                                                                                                                                                                                                                                                                                                                                                                                                                   |
| 85 | Why is it a struggle to lose the weight after middle age?                                                                                                                                                                                                                                                                                                                                                                                                                                |
| 86 | When did the individual become obese?                                                                                                                                                                                                                                                                                                                                                                                                                                                    |
| 87 | How is your appetite?                                                                                                                                                                                                                                                                                                                                                                                                                                                                    |
| 88 | At what age does excess weight begin to adversely affect health?                                                                                                                                                                                                                                                                                                                                                                                                                         |
| 89 | Does the age at which people become overweight influence person's ability to lose weight later in life?                                                                                                                                                                                                                                                                                                                                                                                  |
| 90 | How long should an effective weight management intervention be to provide both weight loss and weight maintenance?                                                                                                                                                                                                                                                                                                                                                                       |
| 91 | What is the lowest level of intervention needed for a response?                                                                                                                                                                                                                                                                                                                                                                                                                          |
| 92 | How can we better understand the effective components of behaviour change interventions?                                                                                                                                                                                                                                                                                                                                                                                                 |

|             |                                                                                                                                                                                                                |
|-------------|----------------------------------------------------------------------------------------------------------------------------------------------------------------------------------------------------------------|
| 93          | Is it not what you do but how many different things you do? I.e. the impact of whole systems...                                                                                                                |
| 94          | What has worked for you in the past and why you could not maintain your progression?                                                                                                                           |
| 95          | What are your long term goals? Where would you like to be in 5 years' time?                                                                                                                                    |
| 96          | Have you ever tried to lose weight before? How many times? And what was the outcome? - past experiences will help to find better solutions/option for a particular person                                      |
| 97          | How can we maintain healthy behaviour patterns in relation to eating and exercising?                                                                                                                           |
| 98          | How can I maintain a healthy weight and lifestyle?                                                                                                                                                             |
| 99          | What characteristics of weight loss interventions are likely to lead to LONG-TERM MAINTENANCE of weight loss?                                                                                                  |
| 100         | What are the evidence based interventions to maintain weight loss.                                                                                                                                             |
| 101         | What's the best strategy to keep the weight off, once lost?                                                                                                                                                    |
| 102         | What is the most successful strategy to prevent weight regain?                                                                                                                                                 |
| 103         | Is there any method of weight loss that is reliable in the long term?                                                                                                                                          |
| 104         | Once I lost some weight how avoid putting on again?                                                                                                                                                            |
| 105         | How to sustain weight loss or avoid increasing weight gain when obese if?                                                                                                                                      |
| 106         | What are some of the most successful interventions in getting people to lose weight, and keep it off?                                                                                                          |
| 107         | How to maintain the weight loss?                                                                                                                                                                               |
| 108         | How can we ensure weight loss is sustained in the long term?                                                                                                                                                   |
| 109         | What is the best way to maintain weight loss                                                                                                                                                                   |
| 110         | What is the best/most effective way of losing weight and keeping it off long-term?                                                                                                                             |
| 111         | How to achieve sustained weight loss                                                                                                                                                                           |
| 112         | 23. maintaining weight lost                                                                                                                                                                                    |
| 113         | What are the best regimes for long term weight management                                                                                                                                                      |
| 114         | How to prevent weight gain                                                                                                                                                                                     |
| 115do<br>es | Having lost weight do you find it creeps back on and maybe even goes up?                                                                                                                                       |
| 116         | Why do so many people who lose weight regain the weight they lost?                                                                                                                                             |
| 117         | Research into keeping the weight off, once it has been lost as lots of people manage to lose weight and then put it on again.                                                                                  |
| 118         | Why do we slip back into destructive eating patterns so quickly?                                                                                                                                               |
| 119         | What is the optimal dose of treatment contact required to prevent weight regain?                                                                                                                               |
| 120         | How can we maintain the modest weight loss achieved by lifestyle intervention or moderate weight loss achieved by VLED on the long run?                                                                        |
| 121         | How can we apply a whole systems approach to weight loss maintenance?                                                                                                                                          |
| 122         | Is there enough focus on transitioning from weight reduction to the maintenance of healthy weight?                                                                                                             |
| 123         | Is weight maintenance feasible for any or many pts in weight loss programmes, and is this vital for health improvements                                                                                        |
| 124         | What is the best way to keep weight off in middle age?                                                                                                                                                         |
| 125         | What impact does it have on long term weight loss if the whole family is considered and not just the obese person in isolation                                                                                 |
| 126         | Identifying how much support is needed for weight maintenance                                                                                                                                                  |
| 127         | What creates success in weight loss? The dietary change/ choice or the long term support?                                                                                                                      |
| 128         | Research on services and messaging that focuses on behaviour change rather than weight loss                                                                                                                    |
| 129         | Which dietary strategies produce the most sustainable weight loss?                                                                                                                                             |
| 130         | Why are weight loss programmes (weight watchers and slimming world) not effective in the long term?                                                                                                            |
| 131         | Do we know which approaches to weight loss actually work?                                                                                                                                                      |
| 132         | Effective weight loss                                                                                                                                                                                          |
| 133         | What effective interventions could we deliver in primary care to help people with overweight and obesity                                                                                                       |
| 134         | What Public Health programmes or interventions actually influence people to eat a healthy diet?                                                                                                                |
| 135         | How do people lose weight easily?                                                                                                                                                                              |
| 136         | How can I shift weight easily?                                                                                                                                                                                 |
| 137         | What works to reduce weight?                                                                                                                                                                                   |
| 138         | How to lose weight                                                                                                                                                                                             |
| 139         | Aside from restriction of calories and using more energy what else can I do to reduce my weight                                                                                                                |
| 140         | For those who are already living with overweight/obesity, what are the most efficacious, cost-effective strategies and how can these be implemented?                                                           |
| 141         | How I can make changes in my diet so I can lose some weight?                                                                                                                                                   |
| 142         | Which weight loss methods are the most effective and long lasting? E.g. calorie counting, exercise, group support, portion control, food group's exclusion etc.                                                |
| 143         | Has the person dieted, was this successful                                                                                                                                                                     |
| 144         | Effective weight loss intervention development                                                                                                                                                                 |
| 145         | How effective current treatments for obesity is m, are there any clinical treatments                                                                                                                           |
| 146         | How can people lose weight?                                                                                                                                                                                    |
| 147         | What is the most successful diet                                                                                                                                                                               |
| 148         | What is an easy way to lose weight                                                                                                                                                                             |
| 149         | How do I lose weight?                                                                                                                                                                                          |
| 150         | What is the best and correct advice to give to patients                                                                                                                                                        |
| 151         | Evidence based guidelines for weight loss                                                                                                                                                                      |
| 152         | What actually is the best eating plan to follow it's a minefield out there so much advice on tv books etc. is there research that could prove the best eating plan to reduce weight then maintain it healthily |
| 153         | A holistic approach to weight loss                                                                                                                                                                             |
| 154         | How can we help people change their lifestyles to maintain weight lost with very low energy diets?                                                                                                             |



|     |                                                                                                                                                                                                                                                                                                                                                                                  |
|-----|----------------------------------------------------------------------------------------------------------------------------------------------------------------------------------------------------------------------------------------------------------------------------------------------------------------------------------------------------------------------------------|
| 155 | How effective is schema-focused therapy in weight management?                                                                                                                                                                                                                                                                                                                    |
| 156 | How can we better engage people with weight loss services?                                                                                                                                                                                                                                                                                                                       |
| 157 | What could services do to encourage you to help yourself?                                                                                                                                                                                                                                                                                                                        |
| 158 | What can be done to help people stick to new healthy eating behaviours?                                                                                                                                                                                                                                                                                                          |
| 159 | Why is weight loss maintenance so hard?                                                                                                                                                                                                                                                                                                                                          |
| 160 | Why is it so hard to keep weight off after you lose it?                                                                                                                                                                                                                                                                                                                          |
| 161 | What are the best tools/technologies to help people adhere to long-term dietary and physical activity goals?                                                                                                                                                                                                                                                                     |
| 162 | How do we get people to eat healthily and reduce obesity?                                                                                                                                                                                                                                                                                                                        |
| 163 | How to make lifestyle changes                                                                                                                                                                                                                                                                                                                                                    |
| 164 | What is a healthy lifestyle?                                                                                                                                                                                                                                                                                                                                                     |
| 165 | How to engage people (children and adults) who are overweight in weight management programmes                                                                                                                                                                                                                                                                                    |
| 166 | What are the barriers that prevent people from losing weight?                                                                                                                                                                                                                                                                                                                    |
| 167 | What stops you from losing weight?                                                                                                                                                                                                                                                                                                                                               |
| 168 | What do people with obesity think is their biggest barrier to losing weight and keeping it off?                                                                                                                                                                                                                                                                                  |
| 169 | What are the real barriers in engaging the population in healthy eating for their children?                                                                                                                                                                                                                                                                                      |
| 170 | What are the cultural barriers to different BAME communities exercising in green spaces and what interventions can overcome these barriers.                                                                                                                                                                                                                                      |
| 171 | How can we best help and support you?                                                                                                                                                                                                                                                                                                                                            |
| 172 | What support do you need?                                                                                                                                                                                                                                                                                                                                                        |
| 173 | Repeated failure                                                                                                                                                                                                                                                                                                                                                                 |
| 174 | Would you like to be a healthier weight?                                                                                                                                                                                                                                                                                                                                         |
| 175 | What would you like to weigh/achieve                                                                                                                                                                                                                                                                                                                                             |
| 176 | Do you want to lose weight?                                                                                                                                                                                                                                                                                                                                                      |
| 177 | 'Willpower': Why can some people control what they eat whilst others cannot?                                                                                                                                                                                                                                                                                                     |
| 178 | What is the motivation for your desire to lose weight?                                                                                                                                                                                                                                                                                                                           |
| 179 | Feel hopeless that can't get going                                                                                                                                                                                                                                                                                                                                               |
| 180 | How to manage calories. Mind set to lose weight. Healthy eating. Why do we fail?                                                                                                                                                                                                                                                                                                 |
| 181 | Why we falter/fail when we know weight loss is beneficial                                                                                                                                                                                                                                                                                                                        |
| 182 | What Weight management lifestyle Interventions can be effectively delivered in a primary care setting? Is there a place for group consultations in weight management?                                                                                                                                                                                                            |
| 183 | Are slimming clubs effective                                                                                                                                                                                                                                                                                                                                                     |
| 184 | Would the client feel more supported if they had a weight loss buddy, who may also need to lose weight?                                                                                                                                                                                                                                                                          |
| 185 | To make sure they have a social network so that they can mix with others doing arts and crafts etc.                                                                                                                                                                                                                                                                              |
| 186 | Do you have good friends you can rely on, who would encourage you to lose weight, and motivate you? - It's good to have someone who supports you.                                                                                                                                                                                                                                |
| 187 | Is there a place for group consultations in weight management?                                                                                                                                                                                                                                                                                                                   |
| 188 | Is there a space for peer-support groups within weight management?                                                                                                                                                                                                                                                                                                               |
| 189 | How effective are mobile applications in promoting weight loss among obese patients?                                                                                                                                                                                                                                                                                             |
| 190 | Can digital interventions improve both wt loss and weight management, and if so which ones                                                                                                                                                                                                                                                                                       |
| 191 | Can apps help you lose weight?                                                                                                                                                                                                                                                                                                                                                   |
| 192 | Do group activities help weight loss more?                                                                                                                                                                                                                                                                                                                                       |
| 193 | How best to manage weight loss in housebound patients?                                                                                                                                                                                                                                                                                                                           |
| 194 | Does access to low-cost exercise equipment at home help with weight loss (i.e. mini pedals, which won't take up much room)                                                                                                                                                                                                                                                       |
| 195 | Exercise [how to exercise without having to go to a gym.]                                                                                                                                                                                                                                                                                                                        |
| 196 | What is the benefit of a weight-neutral approach to health                                                                                                                                                                                                                                                                                                                       |
| 197 | Consider shift towards behaviour rather than weight; review and include evidence that weight isn't directly related to poor outcomes - genetics & sociodemographic variables have a much stronger influence; effect of weight stigma on health; adopt health at every size approach.                                                                                             |
| 198 | How can weight-inclusive approaches to health be used to reduce stigma and better support improved overall health?                                                                                                                                                                                                                                                               |
| 199 | This could make the client feel more confident and it could prevent them from being lonely, which could affect their eating habits.                                                                                                                                                                                                                                              |
| 200 | To constantly be alone at home is not healthy and can lead to bad eating habits and mental health issues.                                                                                                                                                                                                                                                                        |
| 201 | Group consultations are becoming more popular and we would benefit from understanding where they have the most impact                                                                                                                                                                                                                                                            |
| 202 | Peer support has proven effective in other health conditions (e.g. stroke, diabetes, chronic pain etc.) in helping individual's access necessary support from those with similar lived experience. Ideas can be shared of how to cope with challenges that present with being overweight, and can reduce feelings of isolation (i.e. I'm not alone in struggling with my weight) |
| 203 | What role does social prescribing play in obesity?                                                                                                                                                                                                                                                                                                                               |
| 204 | Is there any evidence that social prescribing can benefit healthy eating?                                                                                                                                                                                                                                                                                                        |
| 205 | Do BMI bands help to motivate the public to lose weight?                                                                                                                                                                                                                                                                                                                         |
| 206 | Who do people think should be responsible for their health? [Because it's important that health behaviour change messages come from credible/ acceptable sources]                                                                                                                                                                                                                |
| 207 | Do you have to be thin (healthy weight) to discuss and treat excessive weight?                                                                                                                                                                                                                                                                                                   |
| 208 | What can the food industry do to help the nation's palate develop healthier preferences?                                                                                                                                                                                                                                                                                         |
| 209 | Would subsidising fresh food lead to increased consumption and improved health? Would cost be offset by savings to NHS?                                                                                                                                                                                                                                                          |
| 210 | Research into Public health subsidised exercise and activity classes and their effects on rates of obesity in the respective communities?                                                                                                                                                                                                                                        |
| 211 | If local authority swimming pools and gyms were subsidised or free would the cost be offset by improved health and lowered cost the NHS?                                                                                                                                                                                                                                         |
| 212 | Which health policies that target the obesogenic environment (e.g. town planning, advertising restrictions, taxation) are most effective at reaching low socio-economic groups?                                                                                                                                                                                                  |

|    |                                                                                                                                                                                                                                                                                        |
|----|----------------------------------------------------------------------------------------------------------------------------------------------------------------------------------------------------------------------------------------------------------------------------------------|
| 1  |                                                                                                                                                                                                                                                                                        |
| 2  |                                                                                                                                                                                                                                                                                        |
| 3  |                                                                                                                                                                                                                                                                                        |
| 4  | 213 What can behavioural insights tell us about working to change the obesogenic environment? How can this complement the whole systems approach to obesity work?                                                                                                                      |
| 5  | 214 How to change the environment so to make it less obesogenic e.g. fast food shops                                                                                                                                                                                                   |
| 6  | 215 How can we effectively change the obesogenic environment to promote adoption and maintenance of healthier diet and physical activity habits?                                                                                                                                       |
| 7  | 216 What specific strategies help to avoid temptation in an environment filled with food cues?                                                                                                                                                                                         |
| 8  | 217 How does the obesogenic environment directly affect obesity rates?                                                                                                                                                                                                                 |
| 9  | 218 Why, despite public awareness are there so many fast food outlets?                                                                                                                                                                                                                 |
| 10 | 219 How can we change the behaviour of policy makers / town planners to restructure the obesogenic environment?                                                                                                                                                                        |
| 11 | 220 What is the impact of policies looking to change the built environment?                                                                                                                                                                                                            |
| 12 | 221 Implementation of healthy planning/ obesogenic environment                                                                                                                                                                                                                         |
| 13 | 222 How can we change the environment to help prevent obesity? Should we implement more taxes, reduce advertising or do more?                                                                                                                                                          |
| 14 | 223 How can we make environments less obesogenic?                                                                                                                                                                                                                                      |
| 15 | 224 Governance of food environment- thinking in systems                                                                                                                                                                                                                                |
| 16 | 225 How can we adapt our environment to encourage less sedentary behaviour (through town planning/workplace policies/nudges etc.)?                                                                                                                                                     |
| 17 | 226 Whether is it possible to navigate the obesogenic environment without gaining weight or whether the obesogenic environment is has to change?                                                                                                                                       |
| 18 | 227 What do we need to change in the environment to support people to have a health weight?                                                                                                                                                                                            |
| 19 | 228 Which health policies that target the obesogenic environment (e.g. town planning, advertising restrictions, taxation) are most effective at reaching low socio-economic groups?                                                                                                    |
| 20 | 229 The obesogenic environment is a fairly new development, so why can't it be designed away again?                                                                                                                                                                                    |
| 21 | 230 The impact on neighbourhoods built to promote active lifestyles on obesity and prevention of obesity.                                                                                                                                                                              |
| 22 | 231 How can better urban planning actually be implemented?                                                                                                                                                                                                                             |
| 23 | 232 Modification of food environment                                                                                                                                                                                                                                                   |
| 24 | 233 What makes people remain a healthy weight in an obesogenic environment?                                                                                                                                                                                                            |
| 25 | 234 How do we best prevent obesity in the first place; and how do we best lose weight over time if we have a few extra pounds?                                                                                                                                                         |
| 26 | 235 How obesity can be *prevented*, rather than cured.                                                                                                                                                                                                                                 |
| 27 | 236 How to take sufficient, & sustainable preventative measures soon enough in a life to combat obesity                                                                                                                                                                                |
| 28 | 237 How to treat obesity and prevent it                                                                                                                                                                                                                                                |
| 29 | 238 What is best way to prevent, is it to never be obese or to fight it later?                                                                                                                                                                                                         |
| 30 | 239 Have any governments taken effective steps to tackle obesity, and could we learn from this?                                                                                                                                                                                        |
| 31 | 240 What kind of public health promotion programmes and campaigns should governments be promoting/investing in?                                                                                                                                                                        |
| 32 | 241 More research into how other countries are managing to avoid having the same proportions of their population as overweight or obese.                                                                                                                                               |
| 33 | 242 What policy interventions can influence either obesity or other health outcomes related to obesity?                                                                                                                                                                                |
| 34 | 243 What kind of public policy changes are effective at helping people lose weight (e.g., traffic light labelling, calorie counts)?                                                                                                                                                    |
| 35 | 244 What societal changes could be implemented easily / cheaply / at a local level - that would help reduce obesity                                                                                                                                                                    |
| 36 | 245 What community intervention strategies are successful for promoting weight loss in obese populations?                                                                                                                                                                              |
| 37 | 246 Do we have good evidence for community-based weight loss and management interventions?                                                                                                                                                                                             |
| 38 | 247 What are the effects of population level or systems level interventions?                                                                                                                                                                                                           |
| 39 | 248 Is a wider public health rather than a targeted approach better or best used at the same time                                                                                                                                                                                      |
| 40 | 249 How can we apply obesity prevention strategies at the population level?                                                                                                                                                                                                            |
| 41 | 250 What has research shown about if it is easier / cheaper to prevent obesity related diseases?                                                                                                                                                                                       |
| 42 | 251 Early screening and intervention. Let's get creative, appropriate, and effective - what works?                                                                                                                                                                                     |
| 43 | 252 Why doesn't medical intervention via paid subscription to a club or group start at 15% overweight, when it's still possible to see results and do exercise instead of waiting until 100%+ overweight, when exercise is impossible and loss so slow you ever see any end to dieting |
| 44 | 253 What is the impact of the development and implementation of national food policies to support healthy weight in public settings such as schools and hospitals?                                                                                                                     |
| 45 | 254 What influence does fast food advertising have on children obesity?                                                                                                                                                                                                                |
| 46 | 255 Should the government put heavy taxes on unhealthy processed food/drinks and heavily subsidise healthy organic whole food/drinks?                                                                                                                                                  |
| 47 | 256 What is the impact of increasing sugar tax or other legislation to encourage healthier eating                                                                                                                                                                                      |
| 48 | 257 How important are things like the sugar tax and food labelling in the prevention of obesity?                                                                                                                                                                                       |
| 49 | 258 What is the widely held (including public) opinion on "fat taxing" or strict industry/commercial sanctions?                                                                                                                                                                        |
| 50 | 259 Should food and drinks manufacturers be given a "cap" for products (i.e. limited to so many calories, fat, sugar, etc?)                                                                                                                                                            |
| 51 | 260 Any research connected to people living with obesity who are serving long term imprisonments?                                                                                                                                                                                      |
| 52 | 261 How come side effects differ so much from person to person                                                                                                                                                                                                                         |
| 53 | 262 We know that bariatric surgery is currently the most effective treatment for people with severe obesity (e.g. BMI > 40), yet most people with severe obesity don't choose this option even when it is available. Why? What options do people prefer?                               |
| 54 | 263 What is the long term consequences of Bariatric Surgery exacerbate in those with an untreated Binge Eating Disorder?                                                                                                                                                               |
| 55 | 264 How does Bariatric Surgery impact on intimate relationships with patients post-surgery? Exploring gender differences?                                                                                                                                                              |
| 56 | 265 Do community health care practitioners know how to manage long-term post bariatric patients once discharged from acute care?                                                                                                                                                       |
| 57 | 266 Are patients who have had bariatric surgery receiving the recommended follow up in primary care?                                                                                                                                                                                   |
| 58 | 267 For individuals eligible for bariatric surgery, what aftercare support is provided and how long does this support last for?                                                                                                                                                        |
| 59 | 268 Should dietetic and psychological resources be invested in preoperative setting or in post-operative settings?                                                                                                                                                                     |
| 60 | 269 Statistics to weight gain after so many years                                                                                                                                                                                                                                      |
|    | 270 What are the energy requirements with and without CVD and/or weight resistance exercise post bariatric surgery?                                                                                                                                                                    |
|    | 271 Although I don't eat much feel my metabolism lowered with band and gain weight very easy                                                                                                                                                                                           |
|    | 272 What is the short and long term psychological impact of Bariatric Surgery?                                                                                                                                                                                                         |
|    | 273 How best to integrate exercise with commuting                                                                                                                                                                                                                                      |

|     |                                                                                                                                                                                                                                                                                                                                                                        |
|-----|------------------------------------------------------------------------------------------------------------------------------------------------------------------------------------------------------------------------------------------------------------------------------------------------------------------------------------------------------------------------|
| 274 | Is active travel possible in both cities and rural areas?                                                                                                                                                                                                                                                                                                              |
| 275 | What impact does active commute really have on weight loss?                                                                                                                                                                                                                                                                                                            |
| 276 | How can we increase levels of physical activity for those working long hours where being sedentary is largely unavoidable?                                                                                                                                                                                                                                             |
| 277 | Should employers provide benefits for staff e.g. gym membership discounts, walk/cycle to workschemes? How could this be funded?                                                                                                                                                                                                                                        |
| 278 | What do people think about using standing desks at work? What would help motivate obese people to use a standing desk?                                                                                                                                                                                                                                                 |
| 279 | Do employers have an obligation to actively promote healthy lifestyles within the workplace to help employees with diet and obesity? Would this have an impact on absence levels and improve employee performance and engagement.                                                                                                                                      |
| 280 | What more can employers do to help employees keep to a healthy weight?                                                                                                                                                                                                                                                                                                 |
| 281 | How to fit exercise into your week                                                                                                                                                                                                                                                                                                                                     |
| 282 | How can I add some exercise to my life?                                                                                                                                                                                                                                                                                                                                |
| 283 | What is the obstacles for people that stop them getting some physical activity                                                                                                                                                                                                                                                                                         |
| 284 | Why do obese people feel it is not possible to exercise? How can we make this very acceptable and applauded?                                                                                                                                                                                                                                                           |
| 285 | What could be done to encourage obese people to increase their physical activity?                                                                                                                                                                                                                                                                                      |
| 286 | Populations could include parents for school active travel, or adults travelling to work.                                                                                                                                                                                                                                                                              |
| 287 | Whilst exercise causes us to produce endorphins our response to this varies from person to person, does having a lower response make us more susceptible to putting on weight and less likely to exercise?                                                                                                                                                             |
| 288 | How does people's perceptions of air quality influence the likelihood of active travel?                                                                                                                                                                                                                                                                                |
| 289 | Reduction in amount of activities                                                                                                                                                                                                                                                                                                                                      |
| 290 | Do you get out of puff (short of breath) when you walk?                                                                                                                                                                                                                                                                                                                |
| 291 | The importance of fitness/physical activity when overweight/obese                                                                                                                                                                                                                                                                                                      |
| 292 | How can I better judge how many calories are burned by exercising?                                                                                                                                                                                                                                                                                                     |
| 293 | How can we develop objective tracking of energy balance                                                                                                                                                                                                                                                                                                                |
| 294 | Is there a phone app that can be used to photograph a person's plate / food that would provide information on the calorific and nutritional value of the food and inform the person when they had reached their daily recommended allowance. This allowance would be tailored to the individual in terms of age, sex, levels of activity and other health information. |
| 295 | Is there such a thing as an app which can accurately tell user what the calories are in a meal/drink, perhaps by using camera on phone and specific bowl/plate sizes (it can be very complicated if you have to input calories all the time)                                                                                                                           |
| 296 | Many interventions focus on changing people's diets, but it is hard to measure what has changed without using long & detailed questionnaires or apps that often result in inaccurate results. Is there a way to measure diet quality that can easily be applied in clinical / research settings?                                                                       |
| 297 | Do you lose more weight if you exercise or not?                                                                                                                                                                                                                                                                                                                        |
| 298 | Why do people think moderate amounts of exercise creates weight loss                                                                                                                                                                                                                                                                                                   |
| 299 | Is there enough emphasis on combining healthy eating and exercise and a way of combating obesity rather than purely dieting?                                                                                                                                                                                                                                           |
| 300 | How important is exercise in weight loss?                                                                                                                                                                                                                                                                                                                              |
| 301 | Is calorie controlling best way to control weight?                                                                                                                                                                                                                                                                                                                     |
| 302 | What is the best combination of dietary and physical activity strategies to maximize weight outcomes and appetite?                                                                                                                                                                                                                                                     |
| 303 | What is the best form of exercise to lose weight?                                                                                                                                                                                                                                                                                                                      |
| 304 | what is the most efficient exercise to lose weight                                                                                                                                                                                                                                                                                                                     |
| 305 | Most effective exercise                                                                                                                                                                                                                                                                                                                                                |
| 306 | What types of sport contribute to a reduction in obesity for those that don't regularly play or do sports.                                                                                                                                                                                                                                                             |
| 307 | What kind of exercise do I need to do and how often to lose weight?                                                                                                                                                                                                                                                                                                    |
| 308 | Best forms of physical activity for weight loss/maintenance                                                                                                                                                                                                                                                                                                            |
| 309 | What are the health risks of being overweight/obese but physically active? Does being physically active despite being overweight reduce disease risks of being overweight?                                                                                                                                                                                             |
| 310 | To what degree is higher weight due to more muscle OK vs higher weight due to more fat? Basically is it alright to be slightly overweight if it's 'all muscle'?                                                                                                                                                                                                        |
| 311 | How can we widen access to effective weight loss support services for people affected by obesity?                                                                                                                                                                                                                                                                      |
| 312 | Does regional variation in provision of obesity services have a positive or negative correlate with regional prevalence of - and trajectories in - obesity                                                                                                                                                                                                             |
| 313 | How can obesity strategies be applied in practice?                                                                                                                                                                                                                                                                                                                     |
| 314 | What are the best early interventions that can be administered in primary care                                                                                                                                                                                                                                                                                         |
| 315 | Why can I get a gastric bypass on the NHS, but not Slimming World?                                                                                                                                                                                                                                                                                                     |
| 316 | Do integrated lifestyle services offer equivalent outcomes and/or better value than individual programmes?                                                                                                                                                                                                                                                             |
| 317 | Should patients have direct access to Tier 3 services? Esp. those of high BMI                                                                                                                                                                                                                                                                                          |
| 318 | What is the effect of tier 3 weight management services on people with obesity?                                                                                                                                                                                                                                                                                        |
| 319 | How effective and cost-effective are level/tier 3 and 2 weight management services.                                                                                                                                                                                                                                                                                    |
| 320 | Are Tier 3 treatments better than Tier 2                                                                                                                                                                                                                                                                                                                               |
| 321 | Joined up services... we need research that creates a pathway from Tiers 1 - 4                                                                                                                                                                                                                                                                                         |
| 322 | Intervention Cost v Future Cost Saving for the NHS - To evaluate what financial (if any) benefits would be achieved for every £1 spent by the NHS on the interventions available to improve the health of people living with obesity.                                                                                                                                  |
| 323 | Do economic evaluations based on modelling of cohorts over-estimate the benefits of weight loss? [Does weight loss return people to the same risk of those who never gained weight in the first place?] <i>Second part of question used in another section</i>                                                                                                         |
| 324 | How can we develop better economic modelling for the impact of obesity and the benefits of its variety of treatments?                                                                                                                                                                                                                                                  |
| 325 | Does increase in public health funding reduce obesity                                                                                                                                                                                                                                                                                                                  |
| 326 | What is the effectiveness and cost-effectiveness in terms of preventing CV events (and diabetes and other consequences of obesity) for different weight loss / weight regain profiles?                                                                                                                                                                                 |
| 327 | We know that many people who lose weight will regain it. Are there long-term health benefits from short-term weight loss, and if so, is there a minimum amount of weight loss / duration that has clear benefits?                                                                                                                                                      |

|     |                                                                                                                                                                                                                                                                                                                                                                                                                                                                                                                              |
|-----|------------------------------------------------------------------------------------------------------------------------------------------------------------------------------------------------------------------------------------------------------------------------------------------------------------------------------------------------------------------------------------------------------------------------------------------------------------------------------------------------------------------------------|
| 328 | How to engage health service staff in recognising and supporting weight problems                                                                                                                                                                                                                                                                                                                                                                                                                                             |
| 329 | What interventions are realistically delivered within the current NHS models of care e.g. nursing chronic disease reviews? How simple interventions or clinician training might impact. More of a focus on 1:1 interventions as well as Public health interventions.                                                                                                                                                                                                                                                         |
| 330 | What strategies can be used by GPs to promote physical activity in obese people?                                                                                                                                                                                                                                                                                                                                                                                                                                             |
| 331 | Do doctors have the information they need to help all weight related issues?                                                                                                                                                                                                                                                                                                                                                                                                                                                 |
| 332 | What is the baseline knowledge regarding what a healthy diet consists of in the population? Then look at sub groups e.g. age groups, depressed, diabetes etc. Also research what doctors knowledge is of healthy eating AND how important it is to health, how much they feel confident to discuss this with patients or have time to.                                                                                                                                                                                       |
| 333 | How confident are health professionals when raising the issue of weight, and what is their current skill level to have these conversations                                                                                                                                                                                                                                                                                                                                                                                   |
| 334 | How can health professionals be more effectively utilised to support behaviour change conversations during routine interactions                                                                                                                                                                                                                                                                                                                                                                                              |
| 335 | Consultation skills: confidence and capabilities of health care professionals in raising the issue in any points of contacts                                                                                                                                                                                                                                                                                                                                                                                                 |
| 336 | ... Training and education requirements of different healthcare professionals to a advice on nutrition on diet the role of pharmacists in weight and obesity management... <i>(Split - rest of question used in two other sections)</i>                                                                                                                                                                                                                                                                                      |
| 337 | How can we support implementation of obesity guidelines such that very person with obesity is offered significant support to reduce their weight with an acceptable chance of it working?                                                                                                                                                                                                                                                                                                                                    |
| 338 | Is weight loss through diet or surgery of benefit for patients with type 1 diabetes?                                                                                                                                                                                                                                                                                                                                                                                                                                         |
| 339 | Is weight loss surgery a good option for the severely obese, or would lifestyle changes/diet effect a similar long-term result?                                                                                                                                                                                                                                                                                                                                                                                              |
| 340 | Should the threshold for consideration bariatric surgery be lowered?                                                                                                                                                                                                                                                                                                                                                                                                                                                         |
| 341 | Is there any medication than can control appetite and suppress urges that is safe                                                                                                                                                                                                                                                                                                                                                                                                                                            |
| 342 | Is there an effective satiety-inducing drug or other intervention?                                                                                                                                                                                                                                                                                                                                                                                                                                                           |
| 343 | About the design of drugs for obesity, should it focus on drugs for weight loss or should it focus on drugs not to recover lost weight?                                                                                                                                                                                                                                                                                                                                                                                      |
| 344 | Where do medications fit in the treatment pathway?                                                                                                                                                                                                                                                                                                                                                                                                                                                                           |
| 345 | Design of a new obesity measure apart from BMI.                                                                                                                                                                                                                                                                                                                                                                                                                                                                              |
| 346 | A new 'BMI' i.e. we know that BMI is often not relevant. Would be great to come up with a new 'scoring' system related to risk with weight                                                                                                                                                                                                                                                                                                                                                                                   |
| 347 | Why is BMI still used as an indication of healthy weight?                                                                                                                                                                                                                                                                                                                                                                                                                                                                    |
| 348 | Is the BMI a good guide to healthy weight?                                                                                                                                                                                                                                                                                                                                                                                                                                                                                   |
| 349 | Why is BMI still used to define obesity?                                                                                                                                                                                                                                                                                                                                                                                                                                                                                     |
| 350 | With BMI being the crux of determining whether a person is overweight or not - is this notion now somewhat outdated?                                                                                                                                                                                                                                                                                                                                                                                                         |
| 351 | Is BMI a reliable indicator of obesity, or not?                                                                                                                                                                                                                                                                                                                                                                                                                                                                              |
| 352 | Why obesity seems somehow to be related to height but not frame size                                                                                                                                                                                                                                                                                                                                                                                                                                                         |
| 353 | To produce a better version of a weight measure than BMI                                                                                                                                                                                                                                                                                                                                                                                                                                                                     |
| 354 | What better ways are there to assess weight other than BMI?                                                                                                                                                                                                                                                                                                                                                                                                                                                                  |
| 355 | Accurate diagnostic criteria for obesity                                                                                                                                                                                                                                                                                                                                                                                                                                                                                     |
| 356 | Is our definition of obesity accurate                                                                                                                                                                                                                                                                                                                                                                                                                                                                                        |
| 357 | How accurate is a BMI as a guide to health if you are not an average body type?                                                                                                                                                                                                                                                                                                                                                                                                                                              |
| 358 | What is the best way to estimate someone's healthy weight?                                                                                                                                                                                                                                                                                                                                                                                                                                                                   |
| 359 | When will a more appropriate classification of obesity be made, focusing on the origin of the disease, which is necessary for a better treatment?                                                                                                                                                                                                                                                                                                                                                                            |
| 360 | Is the BMI an appropriate way to decide if you're overweight for everybody, e.g., for BAME people?                                                                                                                                                                                                                                                                                                                                                                                                                           |
| 361 | How do I tell if I am a TOFI - Thin on Outside, Fat on Inside (i.e. around vital organs). I might be thin looking but have hidden fat issues.                                                                                                                                                                                                                                                                                                                                                                                |
| 362 | The role of visceral fat [We are becoming increasingly aware that you can be 'skinny' but still unhealthy with regards to general health with high amounts of visceral fat.]                                                                                                                                                                                                                                                                                                                                                 |
| 363 | Clothing size could be used as a measure of weight.                                                                                                                                                                                                                                                                                                                                                                                                                                                                          |
| 364 | What are the body composition changes post-bariatric surgery with and without weight resistance exercise?                                                                                                                                                                                                                                                                                                                                                                                                                    |
| 365 | What is the best, simple measure of adiposity in children?                                                                                                                                                                                                                                                                                                                                                                                                                                                                   |
| 366 | Why is poor quality (highly processed) food so much cheaper than fresh/healthy food and how to get consumers to appreciate the health implications of each?                                                                                                                                                                                                                                                                                                                                                                  |
| 367 | How can we make whole nutritious food more accessible and affordable than heavily processed foods?                                                                                                                                                                                                                                                                                                                                                                                                                           |
| 368 | What parts of the global food system are tending to increase the availability of unhealthy foods and what can be done to reverse these tendencies?                                                                                                                                                                                                                                                                                                                                                                           |
| 369 | The effect on obesity if healthy food were cheaper and not healthy were very expensive                                                                                                                                                                                                                                                                                                                                                                                                                                       |
| 370 | Decrease price of fresh food to enable people on low budget to stop eating processed foods.                                                                                                                                                                                                                                                                                                                                                                                                                                  |
| 371 | Changing the environment in supermarkets and high streets - how can these organisations be motivated to improve quality of food choices                                                                                                                                                                                                                                                                                                                                                                                      |
| 372 | How can we make healthier food more accessible, attractive and convenient?                                                                                                                                                                                                                                                                                                                                                                                                                                                   |
| 373 | The effect of the availability of various foods on eating choices and how the current system encourages or discourages the production of "healthy foods"                                                                                                                                                                                                                                                                                                                                                                     |
| 374 | How can we get nutritional advice/information to those most in need - e.g. low SES, obese                                                                                                                                                                                                                                                                                                                                                                                                                                    |
| 375 | For people living with financial hardship, do they have access to information on how to eat more healthily for the same amount of money? This is often difficult to achieve. It would be interesting to see what difference education in this area made to outcomes for people and their families. Do people with unhealthy eating habits because of a lack of interest/time to cook, and a tendency to eat fast food, do better if they are educated in ways to make healthy changes that do not take much time and effort? |
| 376 | Health choices can sometimes be expensive can we do more to support cheaper locally sustainable options so that people can make healthy choices more partnerships with supermarket chains                                                                                                                                                                                                                                                                                                                                    |
| 377 | Why is healthy food so expensive?                                                                                                                                                                                                                                                                                                                                                                                                                                                                                            |
| 378 | Pensioners and the widowed find it difficult to access cheap or food for one meals. How can this be addressed?                                                                                                                                                                                                                                                                                                                                                                                                               |
| 379 | What can we do to make healthier food more affordable and appealing to young people?                                                                                                                                                                                                                                                                                                                                                                                                                                         |

|     |                                                                                                                                                                                                                                                                                                                                                                                                                                                     |
|-----|-----------------------------------------------------------------------------------------------------------------------------------------------------------------------------------------------------------------------------------------------------------------------------------------------------------------------------------------------------------------------------------------------------------------------------------------------------|
| 380 | The sale of babyfoods high in sugars continues to be a factor in the obesity of children. How can producers be impacted to produce more healthy foods for children?                                                                                                                                                                                                                                                                                 |
| 381 | What research questions need to be addressed to support policy change which leads to stricter industry regulations on the size and composition of unhealthy foods available?                                                                                                                                                                                                                                                                        |
| 382 | Research into whether government funded voluntary schemes for large retailers could help put better choices in front of consumers and change buying habits.                                                                                                                                                                                                                                                                                         |
| 383 | What impact does packaging have - for example the packaging of sugary yogurts vs plain yogurts in people's choices                                                                                                                                                                                                                                                                                                                                  |
| 384 | Should products have a link to what exercise would be needed if you eat/drink a particular product (ie walking, running for 30 minutes)                                                                                                                                                                                                                                                                                                             |
| 385 | What efforts are being made to identify sugar/corn syrup/harmful additives content in food? Why are harmful vegetable oils still being used, especially for take-outs? Can law be passed to embolden the content printing of harmful additives on containers? [How about advertisements/ doing further checks on school meals. Jamie Oliver did some great ground work. We need follow up.] <i>Second part of question used in another section.</i> |
| 386 | How is the degree of processing in the creation of pre-packaged foods best identified?                                                                                                                                                                                                                                                                                                                                                              |
| 387 | Should calories, fat and sugar in items be much more visible on labels and menus (traffic light)                                                                                                                                                                                                                                                                                                                                                    |
| 388 | How can we change social norms around the consumption of junk food / sugar?                                                                                                                                                                                                                                                                                                                                                                         |
| 389 | The impact of reducing availability of energy dense foods on excess caloric intake                                                                                                                                                                                                                                                                                                                                                                  |
| 390 | How can we encourage restaurants to serve smaller portions (or people to make smaller portions at home)?                                                                                                                                                                                                                                                                                                                                            |
| 391 | How can restaurants help with portion control and calorie content of their meals / what impact does this have on obesity levels?                                                                                                                                                                                                                                                                                                                    |
| 392 | Have you heard of aspartame?                                                                                                                                                                                                                                                                                                                                                                                                                        |
| 393 | How does artificial sweetener affect weight gain or loss?                                                                                                                                                                                                                                                                                                                                                                                           |
| 394 | Do we understand the biology of how zero or low calorie sweeteners, particularly diet drinks, effect obesity                                                                                                                                                                                                                                                                                                                                        |
| 395 | What role does artificial sweetener intake have on appetite regulation?                                                                                                                                                                                                                                                                                                                                                                             |
| 396 | Do the huge amount of chemicals that are now used in food and drink production methods affect how the body's metabolism/hormones work, are these unpronounceable chemicals contributing to obesity?                                                                                                                                                                                                                                                 |
| 397 | Do you eat organic foods? [Do you know the benefits of organic & the harm of pesticides?]                                                                                                                                                                                                                                                                                                                                                           |
| 398 | Are the nutrient and energy levels compromised in GMO crops resulting in malnutrition?                                                                                                                                                                                                                                                                                                                                                              |
| 399 | Do GMO's contribute to obesity?                                                                                                                                                                                                                                                                                                                                                                                                                     |
| 400 | Do vitamin and mineral deficiencies cause or contribute to weight gain?                                                                                                                                                                                                                                                                                                                                                                             |
| 401 | Natural ways to lose weight without dieting - how to lose the stubborn weight e.g. I only have 1 stone to lose not 10 but it's tough trying to lose it                                                                                                                                                                                                                                                                                              |
| 402 | Which is more important on the long run, calorie deficit or macro nutrients composition?                                                                                                                                                                                                                                                                                                                                                            |
| 403 | Do you see any link with diet and weight loss or weight gain                                                                                                                                                                                                                                                                                                                                                                                        |
| 404 | Does the keto diet cause greater weight loss than a non keto diet if the same amount of calories are consumed?                                                                                                                                                                                                                                                                                                                                      |
| 405 | What is the right way to eat? High carbohydrate and low fat or High Fat and low carbohydrate? There is so much conflicting information. Why is the medical profession so conflicted?                                                                                                                                                                                                                                                                |
| 406 | What is more effective and healthy, low carbohydrate diets or low fat diets?                                                                                                                                                                                                                                                                                                                                                                        |
| 407 | Does a low carb diet has long term side effects                                                                                                                                                                                                                                                                                                                                                                                                     |
| 408 | Is a high fat, low carb diet a good way to stop putting weight on the stomach?                                                                                                                                                                                                                                                                                                                                                                      |
| 409 | Is a well formulated LCHF diet healthy in the long term?                                                                                                                                                                                                                                                                                                                                                                                            |
| 410 | Is fat or sugar causing the obesity?                                                                                                                                                                                                                                                                                                                                                                                                                |
| 411 | Is there a direct link between how much processed food is in a person diet to how many ailments may affect them later in life?                                                                                                                                                                                                                                                                                                                      |
| 412 | What is the impact on weight of eating processed foods? E.g. is there a correlation between eating processed food and increased calorie intake or weight gain.                                                                                                                                                                                                                                                                                      |
| 413 | Plant based eating for weight loss                                                                                                                                                                                                                                                                                                                                                                                                                  |
| 414 | Are plant based diets associated with obesity prevention, weight loss, and weight-loss management?                                                                                                                                                                                                                                                                                                                                                  |
| 415 | Is vegan a good way to reduce obesity?                                                                                                                                                                                                                                                                                                                                                                                                              |
| 416 | How much meat should we eat?                                                                                                                                                                                                                                                                                                                                                                                                                        |
| 417 | Can being a vegetarian INCREASE weight?                                                                                                                                                                                                                                                                                                                                                                                                             |
| 418 | Is it better to be vegetarian or eat meat fish etc.?                                                                                                                                                                                                                                                                                                                                                                                                |
| 419 | How to make all of us be more aware of the negative impact of high meat intake                                                                                                                                                                                                                                                                                                                                                                      |
| 420 | Is protein from animal sources bad for our health                                                                                                                                                                                                                                                                                                                                                                                                   |
| 421 | How much harm does a high protein diet do to your body?                                                                                                                                                                                                                                                                                                                                                                                             |
| 422 | Effectiveness of VLCD use in specific cohorts e.g. children/adolescents or pregnancy?                                                                                                                                                                                                                                                                                                                                                               |
| 423 | I've seen press on very low calorie diets. I'd like to know if they really work and, if they do, how to do them? Does it have to be under the supervision of a GP or can I simply buy meal replacement products at a pharmacy and get the same results?                                                                                                                                                                                             |
| 424 | How alcohol consumption influences weight gain.                                                                                                                                                                                                                                                                                                                                                                                                     |
| 425 | Low calories versus low carbs?                                                                                                                                                                                                                                                                                                                                                                                                                      |
| 426 | Should we teach mindfulness and especially mindful eating to all? Could this make a difference to how we view food and eating?                                                                                                                                                                                                                                                                                                                      |
| 427 | We need more research into how meditation & self-care practices can reduce emotional (non) eating.                                                                                                                                                                                                                                                                                                                                                  |
| 428 | Can yoga help with weight loss?                                                                                                                                                                                                                                                                                                                                                                                                                     |
| 429 | Why is there no huge campaign about conscious eating? Slow eating? Learning to understand the feeling of hunger vs thirst                                                                                                                                                                                                                                                                                                                           |
| 430 | Do you often eat to the point of your stomach being uncomfortable?                                                                                                                                                                                                                                                                                                                                                                                  |
| 431 | Is there a way to turn on the "I'm full" switch earlier to avoid overeating                                                                                                                                                                                                                                                                                                                                                                         |
| 432 | After my first diet I went on I got into a bad cycle of dieting or following a plan that doesn't work and end up bingeing or coming off the diet. I wasn't that big in the first place but family members were telling me I was Bonny!                                                                                                                                                                                                              |
| 433 | What is the rate of eating disordered behaviour in people with obesity, particularly those who repeatedly try to lose weight                                                                                                                                                                                                                                                                                                                        |
| 434 | What percentage of people are overweight because of disordered eating (i.e. mental health)?                                                                                                                                                                                                                                                                                                                                                         |
| 435 | The calorific values of food. how can we accurately assess the amount we eat                                                                                                                                                                                                                                                                                                                                                                        |

|    |                                                                                                                                                                                                                                                                                  |
|----|----------------------------------------------------------------------------------------------------------------------------------------------------------------------------------------------------------------------------------------------------------------------------------|
| 1  |                                                                                                                                                                                                                                                                                  |
| 2  |                                                                                                                                                                                                                                                                                  |
| 3  |                                                                                                                                                                                                                                                                                  |
| 4  | 436 Long term efficiency: Restrictive diets or permissive?                                                                                                                                                                                                                       |
| 5  | 437 Is 'positive' messaging about dietary change (e.g. eat more fruit and veg, eat more fibre) more effective at maintaining a healthy weight than 'negative' messaging (e.g. eat less, fat, sugar, high calorie foods)?                                                         |
| 6  | 438 How much weight and how fast is it lost using time-restricted eating?                                                                                                                                                                                                        |
| 7  | 439 Will intermittent fasting stop obesity                                                                                                                                                                                                                                       |
| 8  | 440 Fasting and if that helps lose weight and maintain it.                                                                                                                                                                                                                       |
| 9  | 441 Does intermittent fasting work better than calorie restriction on its own?                                                                                                                                                                                                   |
| 10 | 442 Is intermittent fasting a good idea?                                                                                                                                                                                                                                         |
| 11 | 443 Is the intermittent fasting a truly healthy lifestyle to adopt?                                                                                                                                                                                                              |
| 12 | 444 Is intermittent dieting/fasting good for health beyond weight loss                                                                                                                                                                                                           |
| 13 | 445 Us fasting bad for your body? Either by restricting calories 2 days a week or eating in a 8 hour window                                                                                                                                                                      |
| 14 | 446 What thoughts on keto intermittent fasting                                                                                                                                                                                                                                   |
| 15 | 447 Do you know if you want to lose weight you should do intermittent fasting and you shouldn't eat carbohydrates?                                                                                                                                                               |
| 16 | 448 How important is the timing of when you eat and what you eat?                                                                                                                                                                                                                |
| 17 | 449 The best hours (or routines) to eat.                                                                                                                                                                                                                                         |
| 18 | 450 How important is the practice of restricted time eating to weight control, metabolic health and well being                                                                                                                                                                   |
| 19 | 451 What is the impact of meal timing on weight, appetite and metabolic outcomes?                                                                                                                                                                                                |
| 20 | 452 Late night eating (NE)                                                                                                                                                                                                                                                       |
| 21 | 453 What foods should I avoid to help lose weight? [Should I be eating more protein after doing exercise and less carbs. it is quite confusing.]                                                                                                                                 |
| 22 | 454 Does the time between last meal at night and breakfast, the first meal in the morning have an effect on weight ?                                                                                                                                                             |
| 23 | 455 Is okay to skip breakfast?                                                                                                                                                                                                                                                   |
| 24 | 456 What impact does work hours (shifts / etc.) have on weight?                                                                                                                                                                                                                  |
| 25 | 457 Which is better for weight loss, the traditional 3 meals a day or snacking throughout the day?                                                                                                                                                                               |
| 26 | 458 Is there really a difference between the different diets you read about in terms of diabetes remission? Can you get the same benefits with weight loss by any means?                                                                                                         |
| 27 | See 336 Insulin resistance and its role in weight gain and obesity... (rest of question used in two other sections)                                                                                                                                                              |
| 28 | 459 Are you aware of the role insulin plays in the storage of fat?                                                                                                                                                                                                               |
| 29 | 460 What other health conditions are directly impacted by obesity, as opposed to correlating with obesity?                                                                                                                                                                       |
| 30 | 461 Are fat cells created after puberty?                                                                                                                                                                                                                                         |
| 31 | 462 In the UK the shape of women's bodies has undergone a drastic change over the past couple of decades. What are the underlying causes, can we identify the people group, and how can we help reverse this?                                                                    |
| 32 | 463 Underlying issues when it comes to why people eat too much and or choose the wrong foods?                                                                                                                                                                                    |
| 33 | 464 Look at why we eat from an environmental and behaviour perspective                                                                                                                                                                                                           |
| 34 | 465 Does my emotional state influences my overeating?                                                                                                                                                                                                                            |
| 35 | 466 Are overeating behaviours linked to emotional states? Do we eat more when happy or sad?                                                                                                                                                                                      |
| 36 | 467 How can I disassociate eating from how I am feeling?                                                                                                                                                                                                                         |
| 37 | 468 Research into eating habits and mood swings, i.e. when do they binge. Trigger points.                                                                                                                                                                                        |
| 38 | 469 Mental mind set how is this managed?                                                                                                                                                                                                                                         |
| 39 | 470 What is lacking (physically, emotionally or psychologically) when someone overeats and can we be taught to obtain this from a another source?                                                                                                                                |
| 40 | 471 Why are some people unable to not or stop eating foods they know are bad for their health?                                                                                                                                                                                   |
| 41 | 472 Best methods to suppress appetites                                                                                                                                                                                                                                           |
| 42 | 473 How is the "I'm full now - you can stop eating" response triggered?                                                                                                                                                                                                          |
| 43 | 474 Should we start our weight management by sleeping more?                                                                                                                                                                                                                      |
| 44 | 475 What happens in the brain during weight regain?                                                                                                                                                                                                                              |
| 45 | 476 What parts of the brain can we turn off to control the addiction?                                                                                                                                                                                                            |
| 46 | 477 Is there an answer in neuroscience that actually physically disable the part of the brain responsible for the addiction? We do don't become addicted to alcohol/ drugs etc. so young because we are not exposed to them, but we are exposed to food, and the pattern is set. |
| 47 | 478 Impact of Autism on eating patterns                                                                                                                                                                                                                                          |
| 48 | 479 Does stomach muscles have a direct link to satiety? If you have loose stomach muscles due to pregnancy, will you not feel full how much ever you eat                                                                                                                         |
| 49 | 480 Energy Requirements for pre and post bariatric patients at various stages after surgery (e.g. 6mo, 12 mo, 18mo, 24mo)?                                                                                                                                                       |
| 50 | 481 How do changes in body weight and composition influence the energy balance behaviours that may undermine weight management interventions                                                                                                                                     |
| 51 | 482 Diagnostic algorithm for cardiovascular risk stratification in patients with obesity                                                                                                                                                                                         |
| 52 | 483 How much does the microbiome affect absorption and which foods (if any) can keep it at its optimal level                                                                                                                                                                     |
| 53 | 484 The mechanism behind the effect of the gut microbiome in obesity development.                                                                                                                                                                                                |
| 54 | 485 To look at the microbiome of level 3 weight management services and see if they carry particular obesity genes and to see what the diversity of their gut microbes look like.                                                                                                |
| 55 | 486 How does the microbiome influence body habitus - using metagenomics could contribute to this question                                                                                                                                                                        |
| 56 | 487 Can faecal transplant impact weight                                                                                                                                                                                                                                          |
| 57 | 488 Does healthy bacteria in the intestines affect /reduce weight gain?                                                                                                                                                                                                          |
| 58 | 489 Can improving gut bacterial alongside dietary/ exercise interventions help increase weight loss and maintain weight loss?                                                                                                                                                    |
| 59 | 490 How can we change our gut microbiome to help maintain a healthy weight                                                                                                                                                                                                       |
| 60 | 491 The best forms of pre- and pro-biotics to improve health and facilitate weight loss.                                                                                                                                                                                         |

|         |                                                                                                                                                                                                                                                                                                                                                         |
|---------|---------------------------------------------------------------------------------------------------------------------------------------------------------------------------------------------------------------------------------------------------------------------------------------------------------------------------------------------------------|
| 492     | What effect does GOS supplementation happen on the adverse outcomes of obesity                                                                                                                                                                                                                                                                          |
| 493     | Can Obesity cause or contribute to Cancer and Dementia?                                                                                                                                                                                                                                                                                                 |
| 494     | To explore the relationship between the over-consumption of antibiotics and the increase in obesity.                                                                                                                                                                                                                                                    |
| 495     | Can some antidepressant meds cause weight gain;                                                                                                                                                                                                                                                                                                         |
| 496     | Which, and by how much, do prescribed medications adversely affect the patients weight?                                                                                                                                                                                                                                                                 |
| 497     | Impact of medications on obesity                                                                                                                                                                                                                                                                                                                        |
| 498     | What is the best way to don't put weight while taking sertraline?                                                                                                                                                                                                                                                                                       |
| 499     | The effect of obesity on other health issues including dementia, arthritis etc.                                                                                                                                                                                                                                                                         |
| 500     | Does losing weight reduce the risk of cancer and how much weight do you need to lose                                                                                                                                                                                                                                                                    |
| 501     | Does weight loss reduce risk of heart failure in people with known heart failure?                                                                                                                                                                                                                                                                       |
| 502     | Do patients with mild/moderate heart failure benefit from weight loss interventions?                                                                                                                                                                                                                                                                    |
| 503     | Do obese people have more digestive problems than normal weight people?                                                                                                                                                                                                                                                                                 |
| 504     | Weight loss plan for those with IBS and Diverticulitis and gluten intolerance                                                                                                                                                                                                                                                                           |
| 505     | Does one specific type of diet work for a single disease (e.g. a vegan diet for cvd)?                                                                                                                                                                                                                                                                   |
| 506     | Relationship between obesity and osteoarthritis (if any)                                                                                                                                                                                                                                                                                                |
| 507     | How obesity affects bone health                                                                                                                                                                                                                                                                                                                         |
| 508     | Impact on joints                                                                                                                                                                                                                                                                                                                                        |
| 509     | What impact does maintaining a healthy weight have on mobility (knee joints etc)?                                                                                                                                                                                                                                                                       |
| 510     | Knee wear                                                                                                                                                                                                                                                                                                                                               |
| 511     | Hip wear                                                                                                                                                                                                                                                                                                                                                |
| 512     | In older adults exercise can be difficult due to rheumatic issues. How should diet accommodate this                                                                                                                                                                                                                                                     |
| 513     | Is it better to aim to be slightly underweight to reduce stress on the joints in old age?                                                                                                                                                                                                                                                               |
| 514     | The relation between long term illness and weight gain.                                                                                                                                                                                                                                                                                                 |
| 515     | Pain and Obesity, eating as an avoidance strategy for pain?                                                                                                                                                                                                                                                                                             |
| 516     | Why do women with polycystic ovaries often put on a lot of weight                                                                                                                                                                                                                                                                                       |
| 517     | What effects do hormonal changes have on weight and how can one differentiate between gain due to hormones vs diet.                                                                                                                                                                                                                                     |
| 518     | What level of BMI reduction is required to significantly increase the chance of ovulation for obese women with a menorrhoea as part of PCOS?                                                                                                                                                                                                            |
| 519     | How effective is weight loss as a treatment for PCOS?                                                                                                                                                                                                                                                                                                   |
| 520     | What is the effect on weight gain of the removal of half of a thyroid gland and 16 months later a hysterectomy with the removal of ovaries?                                                                                                                                                                                                             |
| 521     | Under treatment of underactive thyroid: is there a need to review current guidelines and treat 'subclinical' hypothyroidism?                                                                                                                                                                                                                            |
| 522     | Do you have any medical condition, e.g. thyroid problems, which might cause obesity?                                                                                                                                                                                                                                                                    |
| 523     | Do you feel you have become obese as a result of medical / physical condition or some other factor                                                                                                                                                                                                                                                      |
| 524     | Why have I had a life long struggle with my weight, despite not over eating [I have only recently found out I have lipoedema. If I had known this earlier, things might have been different.]                                                                                                                                                           |
| 525     | What motivates and facilitates people with chronic illnesses who are overweight or obese to lose weight? Which biomedical and socioeconomic barriers do people face, that prevent them from being able to lose weight and what can be put in place to overcome these obstacles?                                                                         |
| 526     | What effects does it have on the heart?                                                                                                                                                                                                                                                                                                                 |
| 527     | If my type 2 diabetes is in remission (blood-sugar levels 5.4 or lower), am I still diabetic?                                                                                                                                                                                                                                                           |
| 528     | Does the amount of sugar eaten worsen liver disease                                                                                                                                                                                                                                                                                                     |
| 529     | Is red meat bad for liver disease                                                                                                                                                                                                                                                                                                                       |
| 530     | What is the impact of diagnosing non-alcohol related fatty liver disease as a motivator for people to lose weight                                                                                                                                                                                                                                       |
| 531     | What evidence is there that children and teenagers post liver transplant will find it challenging to maintain a healthy weight?                                                                                                                                                                                                                         |
| 532     | Are obese people more likely to get colds                                                                                                                                                                                                                                                                                                               |
| 533     | Why do some men have man breasts [People suffer mental health issues due to this]                                                                                                                                                                                                                                                                       |
| 534     | How much does obesity limit and impact our life                                                                                                                                                                                                                                                                                                         |
| 535     | What impacts does obesity have on health                                                                                                                                                                                                                                                                                                                |
| 536     | The role in obesity in relation to prevention of ill health? [Because prevention at an early stage will help improve the quality of life for a vast number of people]                                                                                                                                                                                   |
| 537     | By how much does being obese affect your predicted life span                                                                                                                                                                                                                                                                                            |
| 538     | What is the life expectancy of obese people as compared to similar individuals who are not overweight?                                                                                                                                                                                                                                                  |
| 539     | What is the impact of obesity on peoples' lives including their life opportunities?                                                                                                                                                                                                                                                                     |
| See 77  | What are the benefits versus harms/risks of weight loss using different weight loss methods or specific types/groups of people? [If you are genetically pre-disposed to obesity, are you better to live at a higher weight, if trying to reduce your weight leads to repeated weight cycling] ( <i>First part of question used in another section</i> ) |
| See 323 | Do economic evaluations based on modelling of cohorts over-estimate the benefits of weight loss? [Does weight loss return people to the same risk of those who never gained weight in the first place?] ( <i>First part of question used in another section</i> )                                                                                       |
| 540     | The physiological impact of early menopause and weight gain.                                                                                                                                                                                                                                                                                            |
| 541     | Understanding of why women put on weight before menopause when never previously struggled with weight                                                                                                                                                                                                                                                   |
| 542     | What is the effect of hormones during and after menopause on weight gain                                                                                                                                                                                                                                                                                |
| 543     | Why is weight loss so hard post menopause?                                                                                                                                                                                                                                                                                                              |
| 544     | I've now come through the menopause and it is even more difficult to maintain a steady weight.                                                                                                                                                                                                                                                          |
| 545     | Heavy/abnormal periods and whether they are weight related or not                                                                                                                                                                                                                                                                                       |
| 546     | Hormones/hormonal process. How they affect? Are these changes real? How could we counteract effects? Hormone injection for weight loss?                                                                                                                                                                                                                 |

|     |                                                                                                                                                                                                                                                                                                                             |
|-----|-----------------------------------------------------------------------------------------------------------------------------------------------------------------------------------------------------------------------------------------------------------------------------------------------------------------------------|
| 547 | The relationship between testosterone levels and visceral fat?                                                                                                                                                                                                                                                              |
| 548 | We know there is a relationship between high levels of visceral fat and low testosterone levels, and this is also associated with higher CVD risk. Is the converse true? Are higher levels of testosterone associated with lower levels of visceral fat and/or overall CVD risk?                                            |
| 549 | What impact do male/female hormones have on appetite/weight/metabolism?                                                                                                                                                                                                                                                     |
| 550 | Does a baby in utero have a higher risk of becoming obese if Mum is obese during pregnancy?                                                                                                                                                                                                                                 |
| 551 | How targeting prenatal development can reduce obesity risk?                                                                                                                                                                                                                                                                 |
| 552 | How can we prevent young women gaining excessive weight, including during and between pregnancies.                                                                                                                                                                                                                          |
| 553 | What is the effectiveness of weight management programs in the postnatal period and does this lead to a reduced BMI in subsequent pregnancies?                                                                                                                                                                              |
| 554 | Weight increase in pregnancy                                                                                                                                                                                                                                                                                                |
| 555 | What is the most effective method to reduce gestational weight gain in obese women?                                                                                                                                                                                                                                         |
| 556 | We're you breastfed as a baby? [As a mother who has struggled with breastfeeding but has persevered due to the many health benefits, I would like to know more and to have better research on the impact of breastfeeding and weaning on obesity later in life.]                                                            |
| 557 | Does educating school children about how to make healthy eating choices, prepare nutritious food quickly, and shop for healthy food at a low cost make a difference to their overall health and weight in the long term?                                                                                                    |
| 558 | Does educating children within schools on healthy eating help prevent obesity?                                                                                                                                                                                                                                              |
| 559 | Do you think if prevention was started in primary school your outcomes would have been improved?                                                                                                                                                                                                                            |
| 560 | How to prevent obesity in young people and inform at schools?                                                                                                                                                                                                                                                               |
| 561 | What more can be done at a primary school level to tackle obesity?                                                                                                                                                                                                                                                          |
| 562 | Are children educated about this topic?                                                                                                                                                                                                                                                                                     |
| 563 | How to avoid childhood obesity and help child stay a healthy weight?                                                                                                                                                                                                                                                        |
| 564 | What are the most effective health promotion interventions to halt weight increases in children between the ages of 5 and 11?                                                                                                                                                                                               |
| 565 | Which specific factors within health promotion interventions to promote healthy weight on school aged children are effective?                                                                                                                                                                                               |
| 566 | Why/how/what has had an impact on the areas where we are seeing a reduction in childhood obesity?                                                                                                                                                                                                                           |
| 567 | How can we reduce childhood obesity and make sure children grow up with healthy diets?                                                                                                                                                                                                                                      |
| 568 | What are the most effective interventions for the prevention of childhood obesity globally and are they implementable in the UK?                                                                                                                                                                                            |
| 569 | Weight in children                                                                                                                                                                                                                                                                                                          |
| 570 | Policy to promote healthy lifestyle and physical exercise from early age                                                                                                                                                                                                                                                    |
| 571 | What age does healthy eating need to be established in order to prevent adult obesity?                                                                                                                                                                                                                                      |
| 572 | What works in preventing childhood obesity? What works to help people maintain a healthy weight? What works long term to help people lose weight? The influence of mind over body in obesity?                                                                                                                               |
| 573 | Childhood obesity prevention                                                                                                                                                                                                                                                                                                |
| 574 | How can childhood obesity be prevented?                                                                                                                                                                                                                                                                                     |
| 575 | How to prevent obesity in young people and inform at schools?                                                                                                                                                                                                                                                               |
| 576 | Should counselling be provided to school children who are overweight?                                                                                                                                                                                                                                                       |
| 577 | Maintenance of a healthy diet, with group counselling all the way through school.                                                                                                                                                                                                                                           |
| 578 | Should schools place a higher priority on nutrition education and cooking skills?                                                                                                                                                                                                                                           |
| 579 | Would increasing the provision of home economics e.g. cooking skills, budgeting skills, reduce the incidence of adult/childhood obesity?                                                                                                                                                                                    |
| 580 | Would better nutrition/cookery courses throughout a child's WHOLE school life make a difference to their understanding of healthy eating?                                                                                                                                                                                   |
| 581 | What are the essential elements of school food education programs that help children learn positive food behaviours?                                                                                                                                                                                                        |
| 582 | How can we educate/promote sensible choices from childhood when sugar is everywhere? Would this make more sensible adults?                                                                                                                                                                                                  |
| 583 | How can effective school food education programs be leveraged to influence the home environment?                                                                                                                                                                                                                            |
| 584 | How do we encourage parents to establish healthy eating habits in their kids?                                                                                                                                                                                                                                               |
| 585 | Are parents educated to the consequences of bad eating habits in their children?                                                                                                                                                                                                                                            |
| 586 | There is a need for greater funding for personnel and locations for education of parents regarding healthy nutrition. How can this situation be reversed and made more of a priority?                                                                                                                                       |
| 587 | How to help families with children under the age of 11 avoid their children putting on too much weight?                                                                                                                                                                                                                     |
| 588 | How can we best support children and families to change long term behaviour for weight loss?                                                                                                                                                                                                                                |
| 589 | How do we engage parents in meaningful conversations to raise the topic of overweight/healthy growth in an effective manner?                                                                                                                                                                                                |
| 590 | What is the best way to encourage children to eat healthily?                                                                                                                                                                                                                                                                |
| 591 | How can we most effectively engage with an adolescent population regarding diet & exercise?                                                                                                                                                                                                                                 |
| 592 | Diet and weight in adolescents.                                                                                                                                                                                                                                                                                             |
| 593 | How best to engage teenagers in exercise programmes?                                                                                                                                                                                                                                                                        |
| 594 | What can we do to keep children active into adolescence and adulthood?                                                                                                                                                                                                                                                      |
| 595 | Would 1 hour a day of physical activity / sport per day in state schools lead to improved health and obesity levels in children and adolescents and improved habits and health in to adulthood? (97% of school population in the state sector. Independent schools already spend more time doing sport than state schools.) |
| 596 | Strategies to prevent weight gain young adult                                                                                                                                                                                                                                                                               |
| 597 | What support is best for obese teenagers?                                                                                                                                                                                                                                                                                   |
| 598 | How to prevent childhood obesity - particularly in UK ethnic minorities and deprived populations.                                                                                                                                                                                                                           |
| 599 | How do we iron out the social gradient in obesity prevalence, particularly in children?                                                                                                                                                                                                                                     |
| 600 | Children between 1 year and 4 years are found to be overweight by health visitors. They do not qualify for a healthy weight and exercise programme until they are 4. What are the best ways of managing these children?                                                                                                     |
| 601 | Practical education and will help confront the problem and bring resolution. Group therapy is effective amongst a group of people who experience great social difficulty.                                                                                                                                                   |
| 602 | How to encourage Healthy meals uptake in school settings                                                                                                                                                                                                                                                                    |
| 603 | Is adult obesity related to parental attitudes to food and eating?                                                                                                                                                                                                                                                          |



|         |                                                                                                                                                                                                                                                                                                                                                                                                                                                                                                                                                                                                                                           |
|---------|-------------------------------------------------------------------------------------------------------------------------------------------------------------------------------------------------------------------------------------------------------------------------------------------------------------------------------------------------------------------------------------------------------------------------------------------------------------------------------------------------------------------------------------------------------------------------------------------------------------------------------------------|
| 604     | Can we improve coded weight/height/BMI data for children in the GP record? I have an interest in Childhood obesity and would be interested in considering process that would help to code weight related data in the primary care record. There are currently over 27,000 children aged 0-16yrs with registered GP practices in Oxford alone, of these only 19 children had recorded BMI >25, yet we know through NCMP data the prevalence of higher weight status far exceeds this, plus we know very few contacts with families through current programmes for tackling this (e.g. 2019 NCMP only generated 4 referrals in Oxfordshire) |
| 605     | What are the current effects of the National Childhood Measurement Programme in terms of weight trajectories, health care usage, and mental health?                                                                                                                                                                                                                                                                                                                                                                                                                                                                                       |
| 606     | Is NCMP fit for purpose if, as in many places, it is to become a screening programme/pathway into child weight management?                                                                                                                                                                                                                                                                                                                                                                                                                                                                                                                |
| 607     | What are the repercussions of obesity in childhood, in later life?                                                                                                                                                                                                                                                                                                                                                                                                                                                                                                                                                                        |
| 608     | Does obesity impact on children's long term educational outcomes?                                                                                                                                                                                                                                                                                                                                                                                                                                                                                                                                                                         |
| 609     | Does obesity impact on children's long term life chances?                                                                                                                                                                                                                                                                                                                                                                                                                                                                                                                                                                                 |
| 610     | How does obesity impact on children's happiness, confidence and mental health?                                                                                                                                                                                                                                                                                                                                                                                                                                                                                                                                                            |
| 611     | To explore the relationship between adverse childhood events (ACEs) and obesity at a population level.                                                                                                                                                                                                                                                                                                                                                                                                                                                                                                                                    |
| 612     | The relationship between ACE and obesity (either childhood development or a adult).                                                                                                                                                                                                                                                                                                                                                                                                                                                                                                                                                       |
| 613     | Did you have an easy/stress free childhood?                                                                                                                                                                                                                                                                                                                                                                                                                                                                                                                                                                                               |
| 614     | Do childhood or adolescent negative events have an impact on unhealthy eating?                                                                                                                                                                                                                                                                                                                                                                                                                                                                                                                                                            |
| 615     | Is there a connection with mental trauma in childhood to obesity?                                                                                                                                                                                                                                                                                                                                                                                                                                                                                                                                                                         |
| 616     | We need more research into the role of childhood trauma in causing obesity and / or weight related issues in a adulthood.                                                                                                                                                                                                                                                                                                                                                                                                                                                                                                                 |
| 617     | Childhood trauma and being morbidly obese                                                                                                                                                                                                                                                                                                                                                                                                                                                                                                                                                                                                 |
| 618     | What treatments for obesity should be available to children/adolescents?                                                                                                                                                                                                                                                                                                                                                                                                                                                                                                                                                                  |
| 619     | What effective management options are there for paediatric obesity - who should people be referred to/supported by? And how widely available/accessible are these currently?                                                                                                                                                                                                                                                                                                                                                                                                                                                              |
| see 748 | ... Is there any improvement in the figures for schools which provide lunches/boarding schools? ( <i>First part of question answered see 748</i> )                                                                                                                                                                                                                                                                                                                                                                                                                                                                                        |
| See 385 | [What efforts are being made to identify sugar/corn syrup/harmful additives content in food? Why are harmful vegetable oils still being used, especially for take-outs? Can law be passed to embolden the content printing of harmful additives on containers?] How about advertisements/ doing further checks on school meals. Jamie Oliver did some great ground work. We need follow up. ( <i>First part of question used in another section</i> )                                                                                                                                                                                     |
| 620     | How to get the rest of your family on board with supporting in your efforts to transition to a more healthy routine                                                                                                                                                                                                                                                                                                                                                                                                                                                                                                                       |
| 621     | How do participatory approaches with families within the community setting influence implementation and influence on healthy weight behaviours?                                                                                                                                                                                                                                                                                                                                                                                                                                                                                           |
| 622     | Parents often do not engage with healthy weight programmes because they deny their children are overweight. How can parents be more active in recognition of overweight children?                                                                                                                                                                                                                                                                                                                                                                                                                                                         |
| 623     | How much is related to socially and family dysfunctional lives                                                                                                                                                                                                                                                                                                                                                                                                                                                                                                                                                                            |
| 624     | How do we assess and monitor diet quality in infants, older children and adolescents in a valid, robust, consistent and pragmatic way?                                                                                                                                                                                                                                                                                                                                                                                                                                                                                                    |
| 625     | How can I make quick and easy meals with minimal effort so that I lose weight?                                                                                                                                                                                                                                                                                                                                                                                                                                                                                                                                                            |
| 626     | Can you cook                                                                                                                                                                                                                                                                                                                                                                                                                                                                                                                                                                                                                              |
| 627     | Benefits of local communities teaching basic cookery skills                                                                                                                                                                                                                                                                                                                                                                                                                                                                                                                                                                               |
| 628     | Encouraging people to grow healthy foods                                                                                                                                                                                                                                                                                                                                                                                                                                                                                                                                                                                                  |
| 629     | Has the plethora of cookery related programmes on TV had any impact on the nations diet or are they pure entertainment, unrelated to what/how people eat                                                                                                                                                                                                                                                                                                                                                                                                                                                                                  |
| 630     | Are images of obese people in dieting information sheets motivating or demotivating.                                                                                                                                                                                                                                                                                                                                                                                                                                                                                                                                                      |
| 631     | Do food choices based on environmental and sustainability concerns influence weight status in young people?                                                                                                                                                                                                                                                                                                                                                                                                                                                                                                                               |
| 632     | If we change the words and conversations we have around weight and bodies and food, could this be the biggest difference we need in battling the emotional, mental and physical damage done to us by over or under eating, and society's obsession with the body perfect?                                                                                                                                                                                                                                                                                                                                                                 |
| 633     | What are the consequences of weight stigma on physical health                                                                                                                                                                                                                                                                                                                                                                                                                                                                                                                                                                             |
| 634     | How can we combat obesity stigmatisation and discrimination?                                                                                                                                                                                                                                                                                                                                                                                                                                                                                                                                                                              |
| 635     | How can we reduce weight stigma and discrimination in the society?                                                                                                                                                                                                                                                                                                                                                                                                                                                                                                                                                                        |
| 636     | What can be done to change society's attitude towards obese people?                                                                                                                                                                                                                                                                                                                                                                                                                                                                                                                                                                       |
| 637     | What terms could be used instead of obesity to describe the policy area?                                                                                                                                                                                                                                                                                                                                                                                                                                                                                                                                                                  |
| 638     | What are you doing to prevent people being/feeling shamed because of their weight?                                                                                                                                                                                                                                                                                                                                                                                                                                                                                                                                                        |
| 639     | How can we reduce obesity stigma?                                                                                                                                                                                                                                                                                                                                                                                                                                                                                                                                                                                                         |
| 640     | How can we reduce the stigma of weight regain?                                                                                                                                                                                                                                                                                                                                                                                                                                                                                                                                                                                            |
| 641     | 10. What communication is needed to change public perception of Obesity?                                                                                                                                                                                                                                                                                                                                                                                                                                                                                                                                                                  |
| 642     | What are the effects of weight stigma?                                                                                                                                                                                                                                                                                                                                                                                                                                                                                                                                                                                                    |
| 643     | How should stigma around obesity be dealt with?                                                                                                                                                                                                                                                                                                                                                                                                                                                                                                                                                                                           |
| 644     | How can we combat weight stigma?                                                                                                                                                                                                                                                                                                                                                                                                                                                                                                                                                                                                          |
| 645     | Help to address the stigma around weight and weight loss                                                                                                                                                                                                                                                                                                                                                                                                                                                                                                                                                                                  |
| 646     | How can public health messaging about overweight/obesity be delivered to maximise effectiveness and minimise stigma?                                                                                                                                                                                                                                                                                                                                                                                                                                                                                                                      |
| 647     | Do GPs assume that obesity is the fault of the patient rather than something to do with food marketing and/or healthier food availability for poorer people?                                                                                                                                                                                                                                                                                                                                                                                                                                                                              |
| 648     | What can we do to shift an entrenched view within our society (including among some healthcare professionals) that those living with overweight/obesity are entirely responsible for their condition?                                                                                                                                                                                                                                                                                                                                                                                                                                     |
| 649     | Is there an institutional bias against people with obesity in NHS England, trusts, CCGs and the country in general?                                                                                                                                                                                                                                                                                                                                                                                                                                                                                                                       |
| 650     | Can we reduce weight bias in health professionals (GPs, nurses, dietitians)?                                                                                                                                                                                                                                                                                                                                                                                                                                                                                                                                                              |
| 651     | Do health staff treat obese people differently, and less favourably, than those of recommended weight?                                                                                                                                                                                                                                                                                                                                                                                                                                                                                                                                    |
| 652     | How can we reduce health inequalities for obese people, wrt prejudice they may face from medics, whether conscious or unconscious?                                                                                                                                                                                                                                                                                                                                                                                                                                                                                                        |
| 653     | Do GPs assume those with lower BMIs (20-25) are somehow healthier (or more likely to be healthy) than those with higher BMIs?                                                                                                                                                                                                                                                                                                                                                                                                                                                                                                             |

|     |                                                                                                                                                                                                                                                                    |
|-----|--------------------------------------------------------------------------------------------------------------------------------------------------------------------------------------------------------------------------------------------------------------------|
| 654 | Why aren't people living with obesity given the same consideration as others with chronic diseases?                                                                                                                                                                |
| 655 | Are overweight people less likely to receive appropriate health investigation as obesity is seen as causative first, rather than following the same diagnostic route that you would immediately follow with a person whose weight is considered normal/acceptable? |
| 656 | Why are people who are obese not given the same access to healthcare? People who are obese are blocked from receiving NHS surgery by virtue of their weight. Why is the NHS discriminatory against obese people in the supply of surgical procedures?              |
| 657 | Does obesity stigma influence healthcare professional referral practices                                                                                                                                                                                           |
| 658 | Is access to primary care compromised for people classified as overweight or obese because GPs tend to focus on that rather than the concern/symptom the patient actually presented with?                                                                          |
| 659 | Explore whether how all health care professionals are trained around obesity perpetuates weight stigma attitudes which are then reflected in their delivery of care                                                                                                |
| 660 | What words used in a GP consultation influence a person's desire to change their eating habits? (Evidence based)                                                                                                                                                   |
| 661 | How can GPs tackle consultations regarding weight loss in the most sensitive manner? Should the emphasis be on diet as opposed to weight at all?                                                                                                                   |
| 662 | Are you happy with your weight?                                                                                                                                                                                                                                    |
| 663 | I, as an individual, have been received as better thin than fat.                                                                                                                                                                                                   |
| 664 | Do current BMI bands and definitions make sense to the public?                                                                                                                                                                                                     |
| 665 | What forms our image of a healthy body and how can this be used to promote a healthy weight and how society be educated in what is a healthy body weight?                                                                                                          |
| 666 | Why is obesity accepted as a norm and not treated as a serious problem?                                                                                                                                                                                            |
| 667 | Is society's acceptance of obesity creating a feeling in the obese that it is okay to neglect yourself in the way?                                                                                                                                                 |
| 668 | Is the body positivity movement ok? Is it ok to celebrate morbidly obese body shapes?                                                                                                                                                                              |
| 669 | What role does constant media talk of the obesity crisis or 'drain on NHS have on weight bias and perpetuating obesity?                                                                                                                                            |
| 670 | How does the internet, and specifically social media, affect the drive to eat?                                                                                                                                                                                     |
| 671 | Does social media influence eating behaviours?                                                                                                                                                                                                                     |
| 672 | What role has the media played in causing obese people to have low self-esteem?                                                                                                                                                                                    |
| 673 | How much is obesity related to education and personal responsibility                                                                                                                                                                                               |
| 674 | Why don't people who are obese make an effort to lose weight? Is it a lack of dietary understanding; poor motivation; or acceptance of their body image?                                                                                                           |
| 675 | Why do people continue to be obese, when we have plenty of evidence to tell people how not to be?                                                                                                                                                                  |
| 676 | Is it a mind-set problem that causes people to be obese and not deal with it?                                                                                                                                                                                      |
| 677 | What role should personal responsibility play in obesity discussions?                                                                                                                                                                                              |
| 678 | Why is there not more emphasis on personal responsibility when it comes to weight control?                                                                                                                                                                         |
| 679 | Why don't people take ownership of their own health practices                                                                                                                                                                                                      |
| 680 | What is the link between depression and being overweight                                                                                                                                                                                                           |
| 681 | How does being overweight make you feel?                                                                                                                                                                                                                           |
| 682 | Mental health and obesity                                                                                                                                                                                                                                          |
| 683 | The psychological reasons that trigger obesity                                                                                                                                                                                                                     |
| 684 | What is the psychology behind obesity?                                                                                                                                                                                                                             |
| 685 | How would you relate your weight to you mental health?                                                                                                                                                                                                             |
| 686 | Mental Health issues, probably also relates to question above                                                                                                                                                                                                      |
| 687 | Correlation of mental health issues with obesity.                                                                                                                                                                                                                  |
| 688 | Totally life changing after being depressed about weight gain                                                                                                                                                                                                      |
| 689 | How does obesity affect mental health?                                                                                                                                                                                                                             |
| 690 | What causal mechanisms link the social experience of obesity to poor mental health outcomes?                                                                                                                                                                       |
| 691 | Have you considered obesity as a mental health issue, as well as a physical one?                                                                                                                                                                                   |
| 692 | Is there a non-physiological trigger for obesity (such as a psychological trigger like bullying which lead to comfort eating)?                                                                                                                                     |
| 693 | Is there any correlation between mental health illness and obesity?                                                                                                                                                                                                |
| 694 | The physiological impact of stress and weight gain.                                                                                                                                                                                                                |
| 695 | What are the effects of diet culture and a focus on weight loss on individuals' mental health?                                                                                                                                                                     |
| 696 | What are the physical and mental health effects of repeated dieting                                                                                                                                                                                                |
| 697 | How have past diets impacted on my health?                                                                                                                                                                                                                         |
| 698 | What is the impact of repeated dieting on health?                                                                                                                                                                                                                  |
| 699 | Understanding the impact of repeated attempts to change lifestyle habits e.g. is there a parallel with quit attempts                                                                                                                                               |
| 700 | How does others perspectives on a person's weight impacted their mental health?                                                                                                                                                                                    |
| 701 | Why are there so many physical, mental and emotional implications from being overweight?                                                                                                                                                                           |
| 702 | Why is obesity detrimental for people?                                                                                                                                                                                                                             |
| 703 | What's the effect of obesity on self confidence                                                                                                                                                                                                                    |
| 704 | Over-giving to others as a defence against low self-esteem and driver of obesity                                                                                                                                                                                   |
| 705 | How do you feel as a fat person How do people view you as a fat person Do fat people smell Are thin people better than fat people                                                                                                                                  |
| 706 | How does obesity affect social behaviour and self-esteem?                                                                                                                                                                                                          |
| 707 | How does being obese impact social interactions, and how obese people feel they are perceived?                                                                                                                                                                     |
| 708 | We need more research into how, if we help individuals identify and understand how they are feeling, that aids a reduction in emotional (non) eating.                                                                                                              |
| 709 | Can interventions that address emotional or social overeating be effective?                                                                                                                                                                                        |
| 710 | Does therapy help to eliminate emotional eating?                                                                                                                                                                                                                   |
| 711 | How to break the habit of using food for comfort.                                                                                                                                                                                                                  |
| 712 | What mental health/emotional support best helps a person living with obesity?                                                                                                                                                                                      |
| 713 | Overcoming psychological barriers to weight management - can this lead to weight loss when the focus is not on weight?                                                                                                                                             |

|               |                                                                                                                                                                                                                                                                                |
|---------------|--------------------------------------------------------------------------------------------------------------------------------------------------------------------------------------------------------------------------------------------------------------------------------|
| 714           | How can the psychological component of obesity be addressed?                                                                                                                                                                                                                   |
| 715           | Are self-image, self-care and self-confidence sufficiently taken into account in current weight reduction and healthy weight programmes?                                                                                                                                       |
| 716           | Mental health...why is this so important when losing weight? Would a diet based in mental support only be as effective?                                                                                                                                                        |
| 717           | To look at the impact of trauma focused therapy upon weight loss                                                                                                                                                                                                               |
| 718           | Research further: Eating is used as a psychological avoidance strategy to avoid contact with past trauma which causes beliefs /feelings of "I'm not ok or I'm empty" and as a way of avoiding experiencing present feelings and negative thoughts?                             |
| 719           | How to maintain good mental health when struggling with your physical health - in this case, obesity.                                                                                                                                                                          |
| 720           | To ask when the client first started eating more food.                                                                                                                                                                                                                         |
| 721           | How do I get surgery on NHS my dr says Im depressed and my health suffering                                                                                                                                                                                                    |
| 722           | How should weight management services and pathways be optimised for populations with serious mental illness?                                                                                                                                                                   |
| 723           | The link between obesity and depression is well known. Yet why is it, in the absence of thorough investigatory medical care, antidepressants are prescribed to obese people without explanation that these drugs will contribute to weight gain?                               |
| Part of q 336 | ...Weight gain and obesity in severe mental illness - how do we manage this? (Question used in two other sections)                                                                                                                                                             |
| 724           | Do you eat when stressed?                                                                                                                                                                                                                                                      |
| 725           | How does stress relate to weight gain                                                                                                                                                                                                                                          |
| 726           | Are you stressed? Do you think you are on top of things in your life? What is work like?                                                                                                                                                                                       |
| 727           | Tackling stress to affect obesity                                                                                                                                                                                                                                              |
| 728           | How can we reduce or prevent the impulse to eat in people with obesity?                                                                                                                                                                                                        |
| 729           | Is sugar addictive?                                                                                                                                                                                                                                                            |
| 730           | Helping obese people psychologically to overcome food addiction.                                                                                                                                                                                                               |
| 731           | How the addiction to food becomes an issue so young .                                                                                                                                                                                                                          |
| 732           | How do you stop food addiction                                                                                                                                                                                                                                                 |
| 733           | How can you turn off the sugar cravings?                                                                                                                                                                                                                                       |
| 734           | Treatments to modulate hedonistic behaviours - salt intake, confectionery intake, etc                                                                                                                                                                                          |
| 735           | What does sugar do to your body and why do I crave it?                                                                                                                                                                                                                         |
| 736           | Does sugar make you fat?                                                                                                                                                                                                                                                       |
| 737           | Understanding of body treating all carbs as sugar. Seems hard to believe that bread and a chocolate bar can both be treated by the body as sugar                                                                                                                               |
| 738           | How to minimise late night comfort eating                                                                                                                                                                                                                                      |
| 739           | Why do some people crave carbohydrates and do some people react differently to certain carbohydrates.                                                                                                                                                                          |
| 740           | Do you eat when you aren't hungry?                                                                                                                                                                                                                                             |
| 741           | Why do people eat when they're not hungry? What is the link between emotion and consumption? Is there a biological driver?                                                                                                                                                     |
| 742           | How unhealthy eating, mental health and alcohol misuse interplay. What is the most effective way in to tackling this?                                                                                                                                                          |
| 743           | Can overeating be seen as a type of self-harm?                                                                                                                                                                                                                                 |
|               | <b>49 Answered original questions (5.2% of all submitted questions)</b>                                                                                                                                                                                                        |
| 744           | Obesity vs waist circumference and waist to hip ratio for a marker of CVD in adolescent men                                                                                                                                                                                    |
| 745           | Has the decline in teaching Food and Nutrition in senior schools had an impact on the diet of society?                                                                                                                                                                         |
| 746           | Why aren't we teaching children about proper nutrition in school? Nutrition that is based on the latest research, not 30-40 year old findings.                                                                                                                                 |
| 747           | Is there a link between social deprivation and childhood obesity?                                                                                                                                                                                                              |
| 748           | Which groups of kids are most likely to be obese in school (socio economic background, ethnicity, gender, etc.), how does this correlate with their mental health and performance...(second part of this question (not written here) is unanswered and has been taken forward) |
| 749           | Do weight loss initiatives and diets actually work? What are the associated risks?                                                                                                                                                                                             |
| 750           | Carbs, calories, low fat, high starch, syns, points, there must be one method that actually works, without vast expense, thinking of how many have to rely on cheap food, and leaves you not hungry all the time.                                                              |
| 751           | Will eating more fruit and veg make the energy last longer                                                                                                                                                                                                                     |
| 752           | Does drinking water help you lose weight?                                                                                                                                                                                                                                      |
| 753           | What is being done to work with industry to reformulate recipes to be less calorific?                                                                                                                                                                                          |
| 754           | How obesity affects fertility                                                                                                                                                                                                                                                  |
| 755           | impact on fertility?                                                                                                                                                                                                                                                           |
| 756           | Why do men lose weight much quicker than females? Is this something that research may discover something that could help females?                                                                                                                                              |
| 757           | What are the best (short - medium) outcomes to show the effectiveness of weight management in pregnant women?                                                                                                                                                                  |
| 758           | How has pregnancy and have a child affected your weight?                                                                                                                                                                                                                       |
| 759           | The effect of rapid weight loss on your health                                                                                                                                                                                                                                 |
| 760           | Is being underweight better than being overweight?                                                                                                                                                                                                                             |
| 761           | The rise in bowel cancer and obesity- is there a causal effect or just a correlation?                                                                                                                                                                                          |
| 762           | Is being over weight linked to cancers - which ones?                                                                                                                                                                                                                           |
| 763           | Need to emphasise the importance of rapid weight loss in ending diabetes.                                                                                                                                                                                                      |
| 764           | Relationship between obesity and diabetes?                                                                                                                                                                                                                                     |
| 765           | Diabetes                                                                                                                                                                                                                                                                       |
| 766           | Diabetes and nutrition, and how to prevent or reverse type 2                                                                                                                                                                                                                   |
| 767           | How much weight loss is needed to prevent those at high risk developing T2DM?                                                                                                                                                                                                  |
| 768           | Type 2 diabetes now gone                                                                                                                                                                                                                                                       |
| 769           | Does obesity cause, rather than is it associated with, adverse outcomes?                                                                                                                                                                                                       |
| 770           | How does obesity affect your health?                                                                                                                                                                                                                                           |

|     |                                                                                                                                                                                                                                                                                                                               |
|-----|-------------------------------------------------------------------------------------------------------------------------------------------------------------------------------------------------------------------------------------------------------------------------------------------------------------------------------|
| 771 | What evidence is there for the ways in which weight affect various disease processes?                                                                                                                                                                                                                                         |
| 772 | What is the best why to avoid obesity related disease?                                                                                                                                                                                                                                                                        |
| 773 | How much weight gain is permissible before I am at a risk of diseases?                                                                                                                                                                                                                                                        |
| 774 | What are the five most common health complications that arise from obesity.                                                                                                                                                                                                                                                   |
| 775 | How does weight impact on chronic illness and function?                                                                                                                                                                                                                                                                       |
| 776 | What is the link between obesity and illness/disability?                                                                                                                                                                                                                                                                      |
| 777 | Related medical condition                                                                                                                                                                                                                                                                                                     |
| 778 | relationship between obesity and longevity - and is there a genetic tendency to obesity                                                                                                                                                                                                                                       |
| 779 | Genetically are we becoming inbred?                                                                                                                                                                                                                                                                                           |
| 780 | what are risks relating to gastric band                                                                                                                                                                                                                                                                                       |
| 781 | What single change would make the biggest difference to weight loss                                                                                                                                                                                                                                                           |
| 782 | What is the best second line treatment for late gastric dumping post surgery?                                                                                                                                                                                                                                                 |
| 783 | Failure of procedure                                                                                                                                                                                                                                                                                                          |
| 784 | Complications of procedure                                                                                                                                                                                                                                                                                                    |
| 785 | Are psychological interventions being offered routinely within weight management services in the UK?                                                                                                                                                                                                                          |
| 786 | How does stigma around weight and obesity contribute to difficulties initiating weight loss?                                                                                                                                                                                                                                  |
| 787 | What impact does weight stigma have on those trying to lose weight?                                                                                                                                                                                                                                                           |
| 788 | How mental attitudes impact on people's ability to lose weight                                                                                                                                                                                                                                                                |
| 789 | Weight stigma and the experience of the overweight/obese                                                                                                                                                                                                                                                                      |
| 790 | Weight-based stigma in healthcare professionals: how this impacts people's ability to lose weight                                                                                                                                                                                                                             |
| 791 | What is the correlation of certain amount of physical activity (run, walk, etc.) with the calories we burn?                                                                                                                                                                                                                   |
| 792 | Would psychological counselling regarding eating behaviours make people more likely to loose weight and maintain it?                                                                                                                                                                                                          |
|     | <b>149 out of scope submissions (15.8% of all submitted questions): out of scope / not a research question / too broad / not obesity related / opinion based / unclear/ unclear but similar question in included research question above.</b>                                                                                 |
| 793 | What is your correct weight bearing in mind BMI                                                                                                                                                                                                                                                                               |
| 794 | How do I find out what is normal and healthy for my age and gender?                                                                                                                                                                                                                                                           |
| 795 | How is obesity measured?                                                                                                                                                                                                                                                                                                      |
| 796 | Why do you think you are overweight?                                                                                                                                                                                                                                                                                          |
| 797 | Should obesity be considered a disease?                                                                                                                                                                                                                                                                                       |
| 798 | Staging of obesity                                                                                                                                                                                                                                                                                                            |
| 799 | What is Obesity? Specific definition and subtypes.                                                                                                                                                                                                                                                                            |
| 800 | How to encourage Healthy meals uptake in school settings.                                                                                                                                                                                                                                                                     |
| 801 | How much damage to our bodies and how they work do fad diets actually achieve? Are we not just chasing an expectation that do esn't exist?                                                                                                                                                                                    |
| 802 | How to navigate and choose the best diet type?                                                                                                                                                                                                                                                                                |
| 803 | Do you know the three macronutrients?                                                                                                                                                                                                                                                                                         |
| 804 | How can I get past health information on food products to understand what is bad in them, not just what is good?                                                                                                                                                                                                              |
| 805 | healthy diet promotion and education                                                                                                                                                                                                                                                                                          |
| 806 | Why is sugar so freely available?                                                                                                                                                                                                                                                                                             |
| 807 | Why, as consumers, are we sold unhealthy food to eat? If trans-fatty acids are as bad for our health as is now being said why is the medical profession, the government and the authorities not informing people? Why are they not preventing the sale and banning the production of processed foods containing these s fats? |
| 808 | What are the corporate determinants of obesity/body-weight?                                                                                                                                                                                                                                                                   |
| 809 | How do we get government to implement more effective policies regarding selling and producing unhealthy food etc.                                                                                                                                                                                                             |
| 810 | How does obesity policy fit into wider public health policy?                                                                                                                                                                                                                                                                  |
| 811 | When was the latest guidance on nutrition in obesity published and who recommended/reviewed it.                                                                                                                                                                                                                               |
| 812 | What is the current and best guidelines to use                                                                                                                                                                                                                                                                                |
| 813 | How much natural, non-processed food do you eat?                                                                                                                                                                                                                                                                              |
| 814 | The only downfall is the excess saggy skin Is it possible to be 'overweight' but still in good health?                                                                                                                                                                                                                        |
| 815 | Does a 'healthy' BMI always reflect healthy physiology? Can you be overweight and healthy?                                                                                                                                                                                                                                    |
| 816 | Can one be healthy at any weight?                                                                                                                                                                                                                                                                                             |
| 817 | My parents are both type 2 diabetic, lifestyle-induced. Does this mean I am certain to be as well?                                                                                                                                                                                                                            |
| 818 | Do you have any medical / physical conditions                                                                                                                                                                                                                                                                                 |
| 819 | Should obesity be recognised as a disease?                                                                                                                                                                                                                                                                                    |
| 820 | Is it calories in and then exercise means calories out ?                                                                                                                                                                                                                                                                      |
| 821 | How can we bring more 'eating behaviours' interventions into standard practice?                                                                                                                                                                                                                                               |
| 822 | Do we need to focus on body weight or risk factors/health?                                                                                                                                                                                                                                                                    |
| 823 | Lap band had 12 years ago worked but broke last feb had removed had bypass in june in latvia at much expense dudnt work                                                                                                                                                                                                       |
| 824 | will there be a mirade cure in the future?                                                                                                                                                                                                                                                                                    |
| 825 | Is there a "cure" for obesity?                                                                                                                                                                                                                                                                                                |
| 826 | What are the psychological contradictions for Bariatric Surgery?                                                                                                                                                                                                                                                              |

|     |                                                                                                                                                                                                                                                                                                                                                                     |
|-----|---------------------------------------------------------------------------------------------------------------------------------------------------------------------------------------------------------------------------------------------------------------------------------------------------------------------------------------------------------------------|
| 827 | Should there be more psychological assessment available for those with obesity other than those with diagnosed eating disorders?                                                                                                                                                                                                                                    |
| 828 | Post operative psychological advice is lacking. This is only open to specific individuals? Other than funding, why has this not been identified as an integral part of the bariatric process                                                                                                                                                                        |
| 829 | Would psychological counselling regarding eating behaviours make people more likely to lose weight and maintain it? I am about to start a program of counselling as a pre requisite for bariatric surgery. I have also had experience with Overeaters Anonymous. I feel that half the battle when it comes to obesity is mental & emotional.                        |
| 830 | Can obesity now be labelled as an eating disorder as it is without a doubt disordered eating and results from many of the same complex psychological, emotional and behavioural issues as anorexia, bulimia etc and can have equally devastating results mentally and physically.                                                                                   |
| 831 | Psychologically informed services, training etc                                                                                                                                                                                                                                                                                                                     |
| 832 | Do fat people need to feel bad about themselves?                                                                                                                                                                                                                                                                                                                    |
| 833 | Do you enjoy food                                                                                                                                                                                                                                                                                                                                                   |
| 834 | To ask the client how they think they would feel if they were able to lose weight and what they miss doing the most.                                                                                                                                                                                                                                                |
| 835 | Do you require and emotional or psychological help or guidance?                                                                                                                                                                                                                                                                                                     |
| 836 | Do you think you would be happier if you were not obese?                                                                                                                                                                                                                                                                                                            |
| 837 | Are you happy with your size                                                                                                                                                                                                                                                                                                                                        |
| 838 | Can increased metabolism rate means you can eat more food                                                                                                                                                                                                                                                                                                           |
| 839 | How do you speed up your metabolism?                                                                                                                                                                                                                                                                                                                                |
| 840 | On a scale of 1 to 10 (with 10 being the happiest), how happy are you with your weight?                                                                                                                                                                                                                                                                             |
| 841 | What would make it a 10?                                                                                                                                                                                                                                                                                                                                            |
| 842 | What could we do to help you make it a 10?                                                                                                                                                                                                                                                                                                                          |
| 843 | What could you do to help you make it a 10?                                                                                                                                                                                                                                                                                                                         |
| 844 | What do you already understand about obesity and weight management?                                                                                                                                                                                                                                                                                                 |
| 845 | to change diets and attitudes to food                                                                                                                                                                                                                                                                                                                               |
| 846 | Does shaming obese people really work                                                                                                                                                                                                                                                                                                                               |
| 847 | Why are the aids via drugs which are available in the USA ignored in the UK                                                                                                                                                                                                                                                                                         |
| 848 | Are there safe drugs available to treat the condition?                                                                                                                                                                                                                                                                                                              |
| 849 | Is there a magic pill that you can take to lose weight?                                                                                                                                                                                                                                                                                                             |
| 850 | What level / amount of physical activity / exercise do you undertake in an average week                                                                                                                                                                                                                                                                             |
| 851 | What is your weekly routine in terms of "movement": how often do you exercise, do you walk to work - if yes how far, do you walk up the stairs or use the escalator and so on, if you have a dog, do you take it for a walk and how long are those, how busy is you after work life: do you have to manage the kids or do you come home and sit in front of the TV. |
| 852 | Does the person do regular exercise to manage weight                                                                                                                                                                                                                                                                                                                |
| 853 | Do you do any exercise?                                                                                                                                                                                                                                                                                                                                             |
| 854 | What can we learn from the epidemiology of obesity to help in terms of prevention?                                                                                                                                                                                                                                                                                  |
| 855 | Do you think it's possible to lose weight and would you like help to lose your excess weight.                                                                                                                                                                                                                                                                       |
| 856 | Why if you ever manage to lose weight, having wasted your life in fat, does the NHS refuse to assist with skin removal, thereby giving you a body to be proud of instead of a grotesque thing to hide, which will inevitably be refilled                                                                                                                            |
| 857 | Do you know what services are available to support weight loss?                                                                                                                                                                                                                                                                                                     |
| 858 | The type weight-loss programme that is suitable dependent upon size, age and physical health presentation. To reduce potential risk of injury, stroke or heart attack                                                                                                                                                                                               |
| 859 | Are researches into obesity funded by government?                                                                                                                                                                                                                                                                                                                   |
| 860 | Who should help patients lose weight? What is the evidence that things such as MECC actually works? Or should we leave it to professionals with obesity treatment experience?                                                                                                                                                                                       |
| 861 | The cost to the NHS for adapting specialist equipment                                                                                                                                                                                                                                                                                                               |
| 862 | What kind of help do you feel that the NHS could provide?                                                                                                                                                                                                                                                                                                           |
| 863 | How do you feel about your weight?                                                                                                                                                                                                                                                                                                                                  |
| 864 | Does malnutrition (diet of poor nutritional value) increase the risk of obesity                                                                                                                                                                                                                                                                                     |
| 865 | What food combinations best help you to lose weight?                                                                                                                                                                                                                                                                                                                |
| 866 | Crisps or not                                                                                                                                                                                                                                                                                                                                                       |
| 867 | Have you drunk any fruit juices?                                                                                                                                                                                                                                                                                                                                    |
| 868 | What is the truth about milk?                                                                                                                                                                                                                                                                                                                                       |
| 869 | Butter and full fat milk?                                                                                                                                                                                                                                                                                                                                           |
| 870 | Successful interventions for disorders which lead to weight loss                                                                                                                                                                                                                                                                                                    |
| 871 | Xxxxxxx                                                                                                                                                                                                                                                                                                                                                             |
| 872 | Is there as much time/money spent on obesity-related diseases as those related to being severely underweight?                                                                                                                                                                                                                                                       |
| 873 | Re-formulate how weight with other factors is 'healthy' and 'unhealthy'                                                                                                                                                                                                                                                                                             |
| 874 | Can we identify at an individual level what rate of weight loss is optimal to avoid harmful complications such as excess skin, gallstones etc                                                                                                                                                                                                                       |
| 875 | How and best to support our most difficult patients                                                                                                                                                                                                                                                                                                                 |
| 876 | Success rate for each procedure                                                                                                                                                                                                                                                                                                                                     |
| 877 | healthy lifestyle initiatives at Primary Care level                                                                                                                                                                                                                                                                                                                 |
| 878 | How strong/reproducible is that evidence?                                                                                                                                                                                                                                                                                                                           |
| 879 | How can guidelines best communicate uncertainty and variability to the public?                                                                                                                                                                                                                                                                                      |
| 880 | What is the impact on the offspring of mum having hyperglycaemia in pregnancy?                                                                                                                                                                                                                                                                                      |

|    |                                                                                                                                                                                                              |
|----|--------------------------------------------------------------------------------------------------------------------------------------------------------------------------------------------------------------|
| 1  |                                                                                                                                                                                                              |
| 2  |                                                                                                                                                                                                              |
| 3  |                                                                                                                                                                                                              |
| 4  | 881 Is the DASH diet effective in reducing the risk of preeclampsia in those with gestational hypertension?                                                                                                  |
| 5  | 882 Impact of changes in ingredients and preparation methods on the nutritional quality of food consumed.                                                                                                    |
| 6  | 883 Is our food poisonous to us?                                                                                                                                                                             |
| 7  | 884 We need more research into how counselling can help identify new strategies to reduce emotional (non) eating.                                                                                            |
| 8  | 885 Eating Disorders eg anorexia can be devastating for those affected, and those who surround them - more research to alleviate needed                                                                      |
| 9  | 886 Is it more likely to suffer from an eating disorder if you've had a life saving procedure?                                                                                                               |
| 10 | 887 Is veganism a form of eating disorder?                                                                                                                                                                   |
| 11 | 888 Understanding the underlying psychological and physiological mechanisms of eating disorders                                                                                                              |
| 12 | 889 How do you feel about your body?                                                                                                                                                                         |
| 13 | 890 How can eating disorders affect the absorption of anti-rejection medication?                                                                                                                             |
| 14 | 891 What foods should you regularly eat?                                                                                                                                                                     |
| 15 | 892 What is the healthiest diet                                                                                                                                                                              |
| 16 | 893 no 5 How can we ensure more people (incl. children) consume a high-quality diet (vegetables, fruits, beans, etc)? why? National and international survey data suggest that people have suboptimal diets. |
| 17 | 894 Diet                                                                                                                                                                                                     |
| 18 | 895 Any new guidance and tips                                                                                                                                                                                |
| 19 | 896 What are the most common misconceptions about dieting and weight-loss?                                                                                                                                   |
| 20 | 897 What can/ is being done to tackle the sheer amount of fake news, fads and terrible advice when it comes to nutrition and diets.                                                                          |
| 21 | 898 How can we educate people and get support from the food industry to get more info about the right food.                                                                                                  |
| 22 | 899 How do dietary patterns and food choices based on environmental and sustainability concerns influence weight status in young people?                                                                     |
| 23 | 900 How to prevent the escalation in childhood obesity in low and middle income countries                                                                                                                    |
| 24 | 901 What lessons that we have learnt in the UK can be communicated and employed in "developing" countries where the next epidemics of obesity are happening?                                                 |
| 25 | 902 What can we learn from the obesity problem in developed countries that can help prevent the same problems in the developing world?                                                                       |
| 26 | 903 What foods actually contribute to increased weight and obesity ?                                                                                                                                         |
| 27 | 904 What foods do you blame for your obesity?                                                                                                                                                                |
| 28 | 905 What food can help break down fat?                                                                                                                                                                       |
| 29 | 906 Health                                                                                                                                                                                                   |
| 30 | 907 understanding the obesity paradox in health of certain patient groups and older patients . Is intentional weight loss always beneficial for health                                                       |
| 31 | 908 Type 2 Diabetes is common in older adults. How can this be avoided?                                                                                                                                      |
| 32 | 909 what food to eat                                                                                                                                                                                         |
| 33 | 910 Using systems dynamics modelling techniques, what are the optimal intervention points on the Foresight Obesity Map?                                                                                      |
| 34 | 911 What research is there into the link between post transplantation patients and anorexia?                                                                                                                 |
| 35 | 912 How to eat sustainably?                                                                                                                                                                                  |
| 36 | 913 Exercise                                                                                                                                                                                                 |
| 37 | 914 More active and healthy                                                                                                                                                                                  |
| 38 | 915 Health                                                                                                                                                                                                   |
| 39 | 916 Increasing Age and weight [impact on NHS]                                                                                                                                                                |
| 40 | 917 Is weight the best proxy for the health impact of weight management programmes?                                                                                                                          |
| 41 | 918 What is your average daily/weekly calorie intake (intake recorded)                                                                                                                                       |
| 42 | 919 Why calorie restriction diets do not work?                                                                                                                                                               |
| 43 | 920 What do you eat?                                                                                                                                                                                         |
| 44 | 921 What do you normally eat and drink on a daily basis?                                                                                                                                                     |
| 45 | 922 Am I on a healthy diet?                                                                                                                                                                                  |
| 46 | 923 Do you know what balance diet is and do you think you have one?                                                                                                                                          |
| 47 | 924 What has/has not worked for you previously?                                                                                                                                                              |
| 48 | 925 How much research is being done on the subject of nutrition?                                                                                                                                             |
| 49 | 926 Why isn't there a fast food chain that just do healthy food?                                                                                                                                             |
| 50 | 927 Is government nutritional advice wrong                                                                                                                                                                   |
| 51 | 928 How sure can I be that things like 'five a day' and alcohol units are based on solid findings and not just arbitrary figures in the general direction of better health.                                  |
| 52 | 929 Why are the most effective treatment for obesity (bariatric surgery) is underutilised in the UK?                                                                                                         |
| 53 | 930 When will a true multidisciplinary treatment be available, especially with psychological / psychiatric treatment, for patients with obesity?                                                             |
| 54 | 931 Adjusting mental attitude needed to achieve weight loss.                                                                                                                                                 |
| 55 | 932 is there a way we can be tested to find out what foods are best suited to our metabolism                                                                                                                 |
| 56 | 933 Do you personally think obesity is a health issue?                                                                                                                                                       |
| 57 | 934 Am I taking enough exercise                                                                                                                                                                              |
| 58 | 935 I have a sweet tooth and throughout the day, I usually consume three to four chunks of sweetmeat or chocolates. Will that increase my chances of obesity definitely or just a probability?               |
| 59 | 936 How can natural experiments be best used to evaluate the potential of obesity interventions? (methodological)                                                                                            |
| 60 | 937 I imagine that other studies have been conducted on this topic. Will data from these studies be taken into consideration, along with your own (comment)                                                  |

|     |                                                                                                                                                                                                                                                                        |
|-----|------------------------------------------------------------------------------------------------------------------------------------------------------------------------------------------------------------------------------------------------------------------------|
| 938 | How can governments be influenced to adopt preventive health measures around obesity rather than focus on treatment? (policy/ implementation)                                                                                                                          |
| 939 | Obesity prevention at the population level: where does political appetite align with evidence? (policy/ implementation)                                                                                                                                                |
| 940 | How can we speed up translation of promising findings from early trials on how to prevent or treat obesity to the real world? What sources of funding or NHS 'pipelines' would help? Could money from the sugar tax or similar be used for this? (about dissemination) |
| 941 | What factors/ characteristics are shared by people who love being active and how does these characters differ from those who hate activity?                                                                                                                            |

For peer review only

**Supplementary Table 3: 149 Unanswered re-phrased questions in rank order from survey 2**

| Rank | Re-phrased questions                                                                                                                                                                                                                                                                                                                                                                                                                                                                                                      | Mean score (SD) |
|------|---------------------------------------------------------------------------------------------------------------------------------------------------------------------------------------------------------------------------------------------------------------------------------------------------------------------------------------------------------------------------------------------------------------------------------------------------------------------------------------------------------------------------|-----------------|
| 1    | What are the most effective methods for weight maintenance following weight loss? What are the effective components of treatments/ programmes incorporating a behavioural element? How many and in what combination are most effective? What is the optimal duration of these programmes?                                                                                                                                                                                                                                 | 8.36 (1.87)     |
| 2    | What is the cost and affordability of a healthy balanced diet? What policy measures could make healthier foods more affordable? What policy measures could improve access to healthy diets for different social and cultural groups, such as people in poverty, people in inner cities, or young and older people?                                                                                                                                                                                                        | 7.85 (2.06)     |
| 3    | Does an intervention that focuses on improving overall health rather than a specific focus on weight loss improve health and wellbeing?                                                                                                                                                                                                                                                                                                                                                                                   | 7.81 (2.25)     |
| 4    | Does having a psychological disorder such as depression and anxiety affect weight, and, if so, what is the mechanism? How do external perceptions of weight affect mental health? What is the effect of weight loss methods and repeated dieting on mental health outcomes?                                                                                                                                                                                                                                               | 7.75 (2.03)     |
| 4    | What are the most effective methods for weight loss? What are the effective components of treatments/ programmes incorporating a behavioural element? How many and in what combination are most effective? What is the optimal duration of these programmes?                                                                                                                                                                                                                                                              | 7.75 (2.36)     |
| 6    | What is the most effective and cost effective mix of population/public health and individual interventions to tackle obesity?                                                                                                                                                                                                                                                                                                                                                                                             | 7.72 (2.26)     |
| 7    | Do interventions (e.g. nutrition education and physical activity) in pre-school, primary school and secondary school reduce children's risk of unhealthy weight gain and, if so, how do they act? Does the effect of such interventions differ by social and cultural groups?                                                                                                                                                                                                                                             | 7.67 (2.22)     |
| 7    | What are the drivers of food choice, appetite, and intake and do variations in these drivers explain who develops obesity and who does not?                                                                                                                                                                                                                                                                                                                                                                               | 7.67 (2.24)     |
| 9    | What are the most effective ways to prompt people to make a weight loss attempt or engage with a weight loss support programme? What are the most effective methods to increase uptake and adherence to programmes?                                                                                                                                                                                                                                                                                                       | 7.65 (2.30)     |
| 10   | How do demographic, social and cultural factors, e.g. age, socioeconomic status (SES), lifestyle, environment, psychosocial functioning affect weight status, weight gain and regional fat distribution? What are the mechanisms involved? Does the effectiveness of weight loss methods depend on social and cultural background and, if so, can the effects be made more equitable? Are weight loss methods tailored to people's background more effective for weight loss and weight maintenance than general methods? | 7.59 (2.41)     |
| 11   | Are people living with obesity at higher risk of infectious diseases? Are they at higher risk of severe consequences from these diseases? What are the proposed mechanisms?                                                                                                                                                                                                                                                                                                                                               | 7.54 (2.31)     |
| =12  | Is weight loss an effective treatment for certain medical conditions and chronic illnesses, e.g. polycystic ovary syndrome (PCOS), hypothyroidism, lipaedema, gastrointestinal conditions, heart failure, osteoarthritis, chronic pain etc? Should specific weight loss methods be recommended for people with overweight and obesity with certain medical conditions and chronic illnesses?                                                                                                                              | 7.53 (2.40)     |
| =12  | Do parents' attitudes to food influence their children's food intake and risk of obesity?                                                                                                                                                                                                                                                                                                                                                                                                                                 | 7.53 (2.35)     |
| =12  | Does the quality or amount of sleep influence bodyweight? Do interventions that increase/ decrease sleep affect weight loss and weight maintenance?                                                                                                                                                                                                                                                                                                                                                                       | 7.50 (2.15)     |
| =12  | In people living with overweight and type 2 diabetes, does losing weight lead to diabetes remission and how long does remission last? What health checks are needed for people who have achieved diabetes remission?                                                                                                                                                                                                                                                                                                      | 7.47 (2.41)     |
| =16  | Does losing weight and regaining it repeatedly adversely affect long-term health or psychological wellbeing compared with staying at a higher weight the whole time?                                                                                                                                                                                                                                                                                                                                                      | 7.45 (2.60)     |



|     |                                                                                                                                                                                                                                                                                                                                                                                                                                                                 |                |
|-----|-----------------------------------------------------------------------------------------------------------------------------------------------------------------------------------------------------------------------------------------------------------------------------------------------------------------------------------------------------------------------------------------------------------------------------------------------------------------|----------------|
| =16 | How do genetic factors, physiological and metabolic processes affect weight status, weight gain and regional fat distribution? What are the mechanisms involved? Do these factors affect the ability to lose and maintain body weight? Do weight loss programmes tailored to a person's genetic makeup or physiology produce greater weight loss than untailored programmes?                                                                                    | 7.45<br>(2.20) |
| 18  | Do interventions that target the 'obesogenic environment', such as community interventions, urban planning, placement of fast food outlets or workplace policies, affect population mean weight and do these effects differ by baseline weight status (underweight, healthy weight, overweight, obesity)? Which of this type of interventions are most effective at reaching low socio-economic groups?                                                         | 7.44<br>(2.40) |
| 19  | Why do some people struggle to maintain motivation during a weight loss attempt?                                                                                                                                                                                                                                                                                                                                                                                | 7.41<br>(2.54) |
| 20  | What are the effects of obesity in childhood on outcomes other than physical health e.g. psychological wellbeing, educational achievement, employment, relationship status etc?                                                                                                                                                                                                                                                                                 | 7.39<br>(2.37) |
| 21  | Does incorporating physical activity into weight loss interventions enhance weight loss? Does this depend upon the frequency and type of physical activity (e.g. high vs low intensity, resistance vs cardiorespiratory activity)?                                                                                                                                                                                                                              | 7.36<br>(2.37) |
| 22  | What effect do working hours (e.g. shift work) and/or a late eating pattern have on body weight and adiposity?                                                                                                                                                                                                                                                                                                                                                  | 7.35<br>(2.70) |
| 23  | Does being physically active mitigate the health consequences of overweight/obesity?                                                                                                                                                                                                                                                                                                                                                                            | 7.31<br>(2.12) |
| 23  | Does prolonged psychological stress affect bodyweight? Do interventions that aim to reduce stress increase weight loss in people living with overweight and obesity compared with interventions not addressing stress?                                                                                                                                                                                                                                          | 7.31<br>(2.20) |
| 25  | Do interventions that address emotional or social overeating lead to weight loss or weight loss maintenance?                                                                                                                                                                                                                                                                                                                                                    | 7.29<br>(2.43) |
| 26  | What is the relationship between emotions and appetite or energy intake?                                                                                                                                                                                                                                                                                                                                                                                        | 7.19<br>(2.29) |
| 27  | What changes in supermarkets or the wider food industry are effective in promoting healthier diets? Does changing labelling and/or packaging on foods affect purchasing, consumption and body weight?                                                                                                                                                                                                                                                           | 7.18<br>(2.36) |
| 28  | Do interventions in primary care prevent obesity? What are the effects of offering weight management referrals on the prevalence of obesity?                                                                                                                                                                                                                                                                                                                    | 7.17<br>(2.30) |
| 28  | How accurate are existing models of the health consequences of excess weight and the impact of weight loss? Which assumptions are critical in determining the long-term effectiveness and cost-effectiveness of weight loss interventions? What is the impact of weight regain on the incidence of disease and cost-effectiveness of weight loss interventions in these models?                                                                                 | 7.17<br>(2.21) |
| 28  | How does the brain control food intake and can we use knowledge of these mechanisms to aid weight loss? What are the brain responses to food during weight loss and following weight regain?                                                                                                                                                                                                                                                                    | 7.17<br>(2.51) |
| 28  | Does social influence affect the amount of energy dense-nutrient poor foods or consumption of healthier foods, and can these norms be changed?                                                                                                                                                                                                                                                                                                                  | 7.17<br>(2.24) |
| 32  | What is the effect of parental support for their children's weight management on weight in a child living with obesity? Are family based interventions aiming at childhood weight control effective?                                                                                                                                                                                                                                                            | 7.16<br>(2.34) |
| 33  | What are the effects of interventions to influence health professionals to support patients with overweight and obesity?                                                                                                                                                                                                                                                                                                                                        | 7.15<br>(2.32) |
| 34  | What is the effect of adult obesity on social behaviour, self-confidence, self-esteem and self-worth?                                                                                                                                                                                                                                                                                                                                                           | 7.14<br>(2.38) |
| 35  | Does the gut microbiome have an effect on weight gain or the risk of obesity? Does the gut microbiome influence body composition or fat distribution? Do human genetics influence the gut microbiome? Can a change in gut microbiome aid weight loss and by what mechanisms? Which strains of bacteria are associated with greatest weight loss during a weight loss attempt? What is the effect of prebiotics or probiotics on weight loss/weight maintenance? | 7.12<br>(2.53) |
| 36  | What impact does obesity have on life opportunities? E.g. employment, marital status, happiness, education.                                                                                                                                                                                                                                                                                                                                                     | 7.11<br>(2.65) |
| =37 | How effective and cost effective are subsidies for healthy food or access to leisure facilities to prevent or treat obesity?                                                                                                                                                                                                                                                                                                                                    | 7.10<br>(2.45) |
| =37 | Does obesity cause dementia?                                                                                                                                                                                                                                                                                                                                                                                                                                    | 7.10<br>(2.34) |

|    |     |                                                                                                                                                                                                                                                                                     |
|----|-----|-------------------------------------------------------------------------------------------------------------------------------------------------------------------------------------------------------------------------------------------------------------------------------------|
| 1  |     |                                                                                                                                                                                                                                                                                     |
| 2  |     |                                                                                                                                                                                                                                                                                     |
| 3  |     |                                                                                                                                                                                                                                                                                     |
| 4  | =37 | Is there a difference in the way that health professionals respond to patients living with obesity compared with people of a healthy weight in terms of investigation, diagnosis and follow up?                                                                                     |
| 5  |     | 7.10<br>(2.49)                                                                                                                                                                                                                                                                      |
| 6  | 40  | Are interventions to treat children or adolescents living with severe obesity effective?                                                                                                                                                                                            |
| 7  |     | 7.08<br>(2.54)                                                                                                                                                                                                                                                                      |
| 8  | 41  | Is it better to advise incorporating physical activity into daily life or taking formal exercise to increase overall levels of physical activity in the population?                                                                                                                 |
| 9  |     | 7.07<br>(2.41)                                                                                                                                                                                                                                                                      |
| 10 | 42  | Are there benefits of some types of diets on diabetes that are independent of the amount of weight lost?                                                                                                                                                                            |
| 11 |     | 7.06<br>(2.27)                                                                                                                                                                                                                                                                      |
| 12 | 43  | What is the impact of reducing the availability of energy dense-nutrient poor foods on overall energy intake?                                                                                                                                                                       |
| 13 |     | 7.05<br>(2.77)                                                                                                                                                                                                                                                                      |
| 14 | =44 | What are the mechanisms that lead to satiation during meals?                                                                                                                                                                                                                        |
| 15 |     | 7.04<br>(2.28)                                                                                                                                                                                                                                                                      |
| 16 | =44 | Does having a choice of how to lose weight improve the success of the weight loss attempt?                                                                                                                                                                                          |
| 17 |     | 7.04<br>(2.48)                                                                                                                                                                                                                                                                      |
| 18 | =44 | In people living with obesity, does losing weight affect how the heart works?                                                                                                                                                                                                       |
| 19 |     | 7.00<br>(2.32)                                                                                                                                                                                                                                                                      |
| 20 | =44 | How do we assess cardiovascular risk in people living with overweight and obesity? Should we stratify interventions for weight loss based on cardiovascular risk in those living with overweight and obesity?                                                                       |
| 21 |     | 7.00<br>(2.24)                                                                                                                                                                                                                                                                      |
| 22 | 48  | Can the provision of healthy school food reduce obesity in children?                                                                                                                                                                                                                |
| 23 |     | 6.99<br>(2.73)                                                                                                                                                                                                                                                                      |
| 24 | =49 | What are the most effective treatments for obesity in people with severe mental illness? Is integrating weight management into mental healthcare effective in supporting weight loss or weight loss maintenance?                                                                    |
| 25 |     | 6.98<br>(2.36)                                                                                                                                                                                                                                                                      |
| 26 | =49 | Does living with obesity affect quality of life? Does losing weight or gaining weight affect quality of life in people living with overweight and obesity?                                                                                                                          |
| 27 |     | 6.98<br>(2.61)                                                                                                                                                                                                                                                                      |
| 28 | =51 | Do family dynamics cause unhealthy weight gain?                                                                                                                                                                                                                                     |
| 29 |     | 6.97<br>(2.59)                                                                                                                                                                                                                                                                      |
| 30 | =51 | Why do some people living with overweight and obesity do insufficient physical activity and what advice or interventions might increase this?                                                                                                                                       |
| 31 |     | 6.97<br>(2.52)                                                                                                                                                                                                                                                                      |
| 32 | =53 | Do interventions to encourage healthier food purchasing affect population mean weight or the prevalence of overweight and obesity?                                                                                                                                                  |
| 33 |     | 6.96<br>(2.46)                                                                                                                                                                                                                                                                      |
| 34 | =53 | Does eating a diet high in processed foods make losing weight, maintaining lost weight, or gaining weight more likely? Do diets high in processed foods lead to a higher incidence of weight-related illness, such as diabetes or heart disease, independent of body weight status? |
| 35 |     | 6.96<br>(2.69)                                                                                                                                                                                                                                                                      |
| 36 | =53 | Does eating a diet high in processed foods make losing weight, maintaining lost weight, or gaining weight more likely? Do diets high in processed foods lead to a higher incidence of weight-related illness, such as diabetes or heart disease, independent of body weight status? |
| 37 |     | 6.96<br>2.69                                                                                                                                                                                                                                                                        |
| 38 | 55  | What are the health risks for individuals who have previously been overweight but have now lost weight compared with those who have never been overweight?                                                                                                                          |
| 39 |     | 6.93<br>(2.43)                                                                                                                                                                                                                                                                      |
| 40 | 56  | How do energy requirements change following weight loss and what are the mechanisms involved?                                                                                                                                                                                       |
| 41 |     | 6.92<br>(2.36)                                                                                                                                                                                                                                                                      |
| 42 | 57  | Can interventions modify individuals' food preferences and does this affect weight outcomes?                                                                                                                                                                                        |
| 43 |     | 6.91<br>(2.29)                                                                                                                                                                                                                                                                      |
| 44 | 58  | Does the imagery used in weight loss interventions and public health messaging affect motivation for behaviour change?                                                                                                                                                              |
| 45 |     | 6.88<br>(2.48)                                                                                                                                                                                                                                                                      |
| 46 | 59  | Does the amount of sugar in baby food affect children's weight gain?                                                                                                                                                                                                                |
| 47 |     | 6.83<br>(2.62)                                                                                                                                                                                                                                                                      |
| 48 | 60  | Is overeating a form of self-harm for some people living with obesity?                                                                                                                                                                                                              |
| 49 |     | 6.80<br>(2.86)                                                                                                                                                                                                                                                                      |
| 50 | =61 | Does the mode of delivery e.g. in-person face-to-face, group, digital, telephone influence the weight loss achieved by a weight loss programme?                                                                                                                                     |
| 51 |     | 6.80<br>(2.45)                                                                                                                                                                                                                                                                      |
| 52 | =61 | Does age of onset of obesity or years lived with obesity influence the effectiveness of specific weight loss methods?                                                                                                                                                               |
| 53 |     | 6.80<br>2.27                                                                                                                                                                                                                                                                        |
| 54 |     |                                                                                                                                                                                                                                                                                     |
| 55 |     |                                                                                                                                                                                                                                                                                     |
| 56 |     |                                                                                                                                                                                                                                                                                     |
| 57 |     |                                                                                                                                                                                                                                                                                     |
| 58 |     |                                                                                                                                                                                                                                                                                     |
| 59 |     |                                                                                                                                                                                                                                                                                     |
| 60 |     |                                                                                                                                                                                                                                                                                     |

|    |     |                                                                                                                                                                                                                                                                                                                                                                                                                                                 |
|----|-----|-------------------------------------------------------------------------------------------------------------------------------------------------------------------------------------------------------------------------------------------------------------------------------------------------------------------------------------------------------------------------------------------------------------------------------------------------|
| 1  |     |                                                                                                                                                                                                                                                                                                                                                                                                                                                 |
| 2  |     |                                                                                                                                                                                                                                                                                                                                                                                                                                                 |
| 3  |     |                                                                                                                                                                                                                                                                                                                                                                                                                                                 |
| 4  | =63 | Does childhood trauma or mental health disorder in childhood cause obesity?                                                                                                                                                                                                                                                                                                                                                                     |
| 5  |     | 6.79<br>2.63                                                                                                                                                                                                                                                                                                                                                                                                                                    |
| 6  | =63 | Is attempting to avoid snacking more or less effective than 'little and often' for weight loss and weight maintenance?                                                                                                                                                                                                                                                                                                                          |
| 7  |     | 6.79<br>2.56                                                                                                                                                                                                                                                                                                                                                                                                                                    |
| 8  | 65  | Does fast food advertising affect the prevalence of overweight and obesity in childhood?                                                                                                                                                                                                                                                                                                                                                        |
| 9  |     | 6.78<br>2.80                                                                                                                                                                                                                                                                                                                                                                                                                                    |
| 10 | 66  | Do markers of blood glucose control and cardiovascular disease (e.g. insulin, glucagon, HbA1c, blood pressure, cholesterol etc) predict weight gain and obesity? What effect do these markers have on weight loss and weight maintenance?                                                                                                                                                                                                       |
| 11 |     | 6.77<br>2.39                                                                                                                                                                                                                                                                                                                                                                                                                                    |
| 12 |     |                                                                                                                                                                                                                                                                                                                                                                                                                                                 |
| 13 | 67  | What are the most accurate and practical ways to measure dietary intake?                                                                                                                                                                                                                                                                                                                                                                        |
| 14 |     | 6.76<br>2.67                                                                                                                                                                                                                                                                                                                                                                                                                                    |
| 15 | 68  | Do weight loss interventions improve blood glucose control or influence cardiovascular risk in people living with type 1 diabetes and obesity and what are the adverse effects?                                                                                                                                                                                                                                                                 |
| 16 |     | 6.75<br>2.51                                                                                                                                                                                                                                                                                                                                                                                                                                    |
| 17 | 69  | Is there institutional bias towards people living with overweight and obesity in different employment sectors and can this be changed?                                                                                                                                                                                                                                                                                                          |
| 18 |     | 6.73<br>2.72                                                                                                                                                                                                                                                                                                                                                                                                                                    |
| 19 | 70  | Do diets high in fat or high in sugar increase the likelihood of gaining weight?                                                                                                                                                                                                                                                                                                                                                                |
| 20 |     | 6.71<br>2.80                                                                                                                                                                                                                                                                                                                                                                                                                                    |
| 21 | =71 | What are the effects of tier 3 services on weight loss and are these services cost-effective?                                                                                                                                                                                                                                                                                                                                                   |
| 22 |     | 6.68<br>2.20                                                                                                                                                                                                                                                                                                                                                                                                                                    |
| 23 | =71 | Do restrictive or permissive diets lead to greater weight loss or weight loss maintenance? Is permissive messaging about dietary change more effective at maintaining a healthy weight than restrictive messaging?                                                                                                                                                                                                                              |
| 24 |     | 6.68<br>2.26                                                                                                                                                                                                                                                                                                                                                                                                                                    |
| 25 | 73  | How do the words used to define and describe overweight and obesity affect perceived discrimination as well as emotional and psychological wellbeing in people living with overweight and obesity? Would changing the language reduce the blame culture associated with obesity? What language used in public health messaging about overweight/obesity encourages weight control without increasing stigma towards people living with obesity? |
| 26 |     | 6.67<br>2.75                                                                                                                                                                                                                                                                                                                                                                                                                                    |
| 27 | =74 | What is the role of the adipocyte life cycle in body weight and obesity?                                                                                                                                                                                                                                                                                                                                                                        |
| 28 |     | 6.66<br>2.36                                                                                                                                                                                                                                                                                                                                                                                                                                    |
| 29 | =74 | Do food additives and non-nutritive sweeteners affect appetite regulation, post-prandial metabolic and endocrine responses and energy intake? Is replacing sugar with non-nutritive sweeteners an effective method of weight loss and weight maintenance?                                                                                                                                                                                       |
| 30 |     | 6.66<br>2.70                                                                                                                                                                                                                                                                                                                                                                                                                                    |
| 31 | 76  | What medical conditions can lead to weight gain and obesity?                                                                                                                                                                                                                                                                                                                                                                                    |
| 32 |     | 6.65<br>2.55                                                                                                                                                                                                                                                                                                                                                                                                                                    |
| 33 | 77  | Do social prescribing schemes such as community gardening, cookery classes, choir, lunch club, or book clubs lead to greater weight loss when trying to lose weight than attempting weight loss without such prescription?                                                                                                                                                                                                                      |
| 34 |     | 6.64<br>2.47                                                                                                                                                                                                                                                                                                                                                                                                                                    |
| 35 | 78  | What effect does social media have on eating behaviours and weight control?                                                                                                                                                                                                                                                                                                                                                                     |
| 36 |     | 6.63<br>2.61                                                                                                                                                                                                                                                                                                                                                                                                                                    |
| 37 | 79  | Are there methods to combine pharmacological and behavioural weight loss treatments that mean the combination is greater than the sum of the parts?                                                                                                                                                                                                                                                                                             |
| 38 |     | 6.62<br>2.69                                                                                                                                                                                                                                                                                                                                                                                                                                    |
| 39 | =80 | What is the prevalence of disordered eating in people living with obesity? Do weight loss interventions increase the risk of disordered eating?                                                                                                                                                                                                                                                                                                 |
| 40 |     | 6.61<br>2.22                                                                                                                                                                                                                                                                                                                                                                                                                                    |
| 41 | =80 | Is it possible to suppress appetite and so reduce energy intake? Is this an effective way to lose weight?                                                                                                                                                                                                                                                                                                                                       |
| 42 |     | 6.61<br>2.68                                                                                                                                                                                                                                                                                                                                                                                                                                    |
| 43 | 82  | Can screening programmes identify those at risk of developing obesity? Does identifying people at risk and implementing early interventions prevent weight gain?                                                                                                                                                                                                                                                                                |
| 44 |     | 6.59<br>2.67                                                                                                                                                                                                                                                                                                                                                                                                                                    |
| 45 |     |                                                                                                                                                                                                                                                                                                                                                                                                                                                 |
| 46 |     |                                                                                                                                                                                                                                                                                                                                                                                                                                                 |
| 47 |     |                                                                                                                                                                                                                                                                                                                                                                                                                                                 |
| 48 |     |                                                                                                                                                                                                                                                                                                                                                                                                                                                 |
| 49 |     |                                                                                                                                                                                                                                                                                                                                                                                                                                                 |
| 50 |     |                                                                                                                                                                                                                                                                                                                                                                                                                                                 |
| 51 |     |                                                                                                                                                                                                                                                                                                                                                                                                                                                 |
| 52 |     |                                                                                                                                                                                                                                                                                                                                                                                                                                                 |
| 53 |     |                                                                                                                                                                                                                                                                                                                                                                                                                                                 |
| 54 |     |                                                                                                                                                                                                                                                                                                                                                                                                                                                 |
| 55 |     |                                                                                                                                                                                                                                                                                                                                                                                                                                                 |
| 56 |     |                                                                                                                                                                                                                                                                                                                                                                                                                                                 |
| 57 |     |                                                                                                                                                                                                                                                                                                                                                                                                                                                 |
| 58 |     |                                                                                                                                                                                                                                                                                                                                                                                                                                                 |
| 59 |     |                                                                                                                                                                                                                                                                                                                                                                                                                                                 |
| 60 |     |                                                                                                                                                                                                                                                                                                                                                                                                                                                 |

|     |                                                                                                                                                                                                                                                                                                                                                                                                                                                                                                                                                                             |              |
|-----|-----------------------------------------------------------------------------------------------------------------------------------------------------------------------------------------------------------------------------------------------------------------------------------------------------------------------------------------------------------------------------------------------------------------------------------------------------------------------------------------------------------------------------------------------------------------------------|--------------|
| 83  | What is the role of social networks in weight control? Does having a weight loss buddy lead to better outcomes?                                                                                                                                                                                                                                                                                                                                                                                                                                                             | 6.58<br>2.41 |
| =84 | What is the effect of behavioural, dietary, pharmacological, and surgical interventions on body composition and fat distribution? Can exercise attenuate loss of lean tissue associated with weight loss?                                                                                                                                                                                                                                                                                                                                                                   | 6.57<br>2.31 |
| =84 | What interventions can help parents to identify if their child is overweight and does this increase their engagement in weight management services?                                                                                                                                                                                                                                                                                                                                                                                                                         | 6.57<br>2.67 |
| 86  | What are the advantages and disadvantages of the various methods of quantifying body fat in routine healthcare? What is the association between these measures and risk of obesity-related health outcomes? What are the most appropriate classifications for overweight and obesity in different demographic groups, e.g. ethnicity, age, gender? Can we develop an easy measurement for 'Thin on Outside, Fat on Inside' for use in routine healthcare? What is the association between being 'Thin on Outside, Fat on Inside' and other obesity related outcomes?        | 6.55<br>2.34 |
| =87 | Do interventions in the general population to improve cookery skills improve weight control?                                                                                                                                                                                                                                                                                                                                                                                                                                                                                | 6.53<br>2.53 |
| =87 | Is limiting daily energy intake a more successful method than limiting daily carbohydrate intake for weight loss and weight maintenance?                                                                                                                                                                                                                                                                                                                                                                                                                                    | 6.53<br>2.52 |
| =89 | Is attempting to follow intermittent fasting (including 5:2, every other day diet, etc.) or time restricted eating (e.g. 16:8 or eating between specific hours of the day) effective for weight loss and weight maintenance? Is intermittent fasting or time restricted eating more effective than calorie restriction alone? Are the benefits from intermittent fasting or time restricted eating (e.g. metabolic health, general wellbeing) independent from weight loss? Are there any side effects or health risks from intermittent fasting or time restricted eating? | 6.52<br>2.60 |
| =89 | Do people crave or become addicted to certain foods and, if so does this cause obesity? Can treatments reduce pica, food cravings or addiction?                                                                                                                                                                                                                                                                                                                                                                                                                             | 6.52<br>2.53 |
| =89 | Is taxing unhealthy foods and drink effective in reducing the prevalence of overweight and obesity?                                                                                                                                                                                                                                                                                                                                                                                                                                                                         | 6.52<br>2.81 |
| 92  | Is obesity a cause or a consequence of reduced physical activity?                                                                                                                                                                                                                                                                                                                                                                                                                                                                                                           | 6.51<br>2.54 |
| 93  | Would rules that limit the energy or macronutrient content of certain categories of food products affect the prevalence of overweight and obesity?                                                                                                                                                                                                                                                                                                                                                                                                                          | 6.49<br>2.54 |
| =94 | Does the menopause cause weight gain/loss? Does the age at menopause affect weight gain and weight loss?                                                                                                                                                                                                                                                                                                                                                                                                                                                                    | 6.46<br>2.46 |
| =94 | What effect does social media have on self-confidence, self-esteem and self-worth of people living with overweight and obesity?                                                                                                                                                                                                                                                                                                                                                                                                                                             | 6.46<br>2.78 |
| =96 | What are the most accurate and practical ways to measure total energy expenditure and physical activity?                                                                                                                                                                                                                                                                                                                                                                                                                                                                    | 6.44<br>2.66 |
| =96 | In women entering pregnancy with overweight or obesity, do intentional efforts to reduce the amount of weight gained reduce the risk of obesity in the offspring?                                                                                                                                                                                                                                                                                                                                                                                                           | 6.44<br>2.59 |
| 98  | Does informing a person living with overweight or obesity that she or he has non-alcoholic fatty liver disease (NAFLD) motivate weight loss?                                                                                                                                                                                                                                                                                                                                                                                                                                | 6.40<br>2.60 |
| 99  | Are there long-term health benefits from short-term weight loss? If so, is there a minimum amount of weight loss/duration that has clear benefits?                                                                                                                                                                                                                                                                                                                                                                                                                          | 6.39<br>2.39 |

|    |      |                                                                                                                                                                                                                                                                                                                                                                                        |              |
|----|------|----------------------------------------------------------------------------------------------------------------------------------------------------------------------------------------------------------------------------------------------------------------------------------------------------------------------------------------------------------------------------------------|--------------|
| 1  |      |                                                                                                                                                                                                                                                                                                                                                                                        |              |
| 2  |      |                                                                                                                                                                                                                                                                                                                                                                                        |              |
| 3  |      |                                                                                                                                                                                                                                                                                                                                                                                        |              |
| 4  | =100 | Are interventions aimed at weight control effective in helping women entering pregnancy with overweight or obesity limit weight gain during pregnancy or lose weight after birth?                                                                                                                                                                                                      | 6.38<br>2.47 |
| 5  |      |                                                                                                                                                                                                                                                                                                                                                                                        |              |
| 6  | =100 | Are total diet replacement programmes with behavioural support as effective as using diet replacement products without behavioural support?                                                                                                                                                                                                                                            | 6.38<br>2.66 |
| 7  |      |                                                                                                                                                                                                                                                                                                                                                                                        |              |
| 8  |      |                                                                                                                                                                                                                                                                                                                                                                                        |              |
| 9  | 102  | What are the effects of the body positivity movement on body weight?                                                                                                                                                                                                                                                                                                                   | 6.36<br>2.70 |
| 10 |      |                                                                                                                                                                                                                                                                                                                                                                                        |              |
| 11 | 103  | Does breastfeeding increase post-partum weight loss or reduce risk of later obesity for the mother?                                                                                                                                                                                                                                                                                    | 6.34<br>2.70 |
| 12 |      |                                                                                                                                                                                                                                                                                                                                                                                        |              |
| 13 | 104  | What are the effects on health of having a body mass index (BMI) within the overweight/obese range yet with high proportion of lean tissue/high muscle mass?                                                                                                                                                                                                                           | 6.33<br>2.62 |
| 14 |      |                                                                                                                                                                                                                                                                                                                                                                                        |              |
| 15 |      |                                                                                                                                                                                                                                                                                                                                                                                        |              |
| 16 | =105 | Has the National Childhood Measurement Programme had an effect upon weight trajectories, health care usage, and mental health of children or their parents?                                                                                                                                                                                                                            | 6.32<br>2.67 |
| 17 |      |                                                                                                                                                                                                                                                                                                                                                                                        |              |
| 18 |      |                                                                                                                                                                                                                                                                                                                                                                                        |              |
| 19 | =105 | Does attempting to limit alcohol intake reduce the risk of weight gain or increase weight loss?                                                                                                                                                                                                                                                                                        | 6.32<br>2.75 |
| 20 |      |                                                                                                                                                                                                                                                                                                                                                                                        |              |
| 21 |      |                                                                                                                                                                                                                                                                                                                                                                                        |              |
| 22 | 107  | Does the low carbohydrate ketogenic diet cause greater weight loss than a reduced carbohydrate non-ketogenic diet? Is attempting to follow a ketogenic or reduced carbohydrate diet safe and effective for weight loss and weight loss maintenance? What are the effects on fat distribution/body composition of these diets? Are there any adverse effects or long-term health risks? | 6.31<br>2.88 |
| 23 |      |                                                                                                                                                                                                                                                                                                                                                                                        |              |
| 24 |      |                                                                                                                                                                                                                                                                                                                                                                                        |              |
| 25 |      |                                                                                                                                                                                                                                                                                                                                                                                        |              |
| 26 |      |                                                                                                                                                                                                                                                                                                                                                                                        |              |
| 27 | 108  | Does the fact that most people are overweight mean that people are less concerned about their own excess weight?                                                                                                                                                                                                                                                                       | 6.28<br>2.76 |
| 28 |      |                                                                                                                                                                                                                                                                                                                                                                                        |              |
| 29 |      |                                                                                                                                                                                                                                                                                                                                                                                        |              |
| 30 | 109  | Are workplace interventions to support active commuting, or schemes to increase physical activity provided through workplaces feasible, acceptable, and do they affect weight?                                                                                                                                                                                                         | 6.26<br>2.23 |
| 31 |      |                                                                                                                                                                                                                                                                                                                                                                                        |              |
| 32 |      |                                                                                                                                                                                                                                                                                                                                                                                        |              |
| 33 | 110  | Is training people to eat less through techniques such as mindfulness or slow eating, or responding to internal hunger and thirst cues effective in helping people lose weight?                                                                                                                                                                                                        | 6.25<br>2.76 |
| 34 |      |                                                                                                                                                                                                                                                                                                                                                                                        |              |
| 35 |      |                                                                                                                                                                                                                                                                                                                                                                                        |              |
| 36 | =111 | Do some people living with overweight and obesity not recognise that they are overweight and what effect would interventions to improve recognition have?                                                                                                                                                                                                                              | 6.19<br>2.65 |
| 37 |      |                                                                                                                                                                                                                                                                                                                                                                                        |              |
| 38 |      |                                                                                                                                                                                                                                                                                                                                                                                        |              |
| 39 | =111 | Do interventions, including clinical follow-up, after bariatric surgery prevent weight regain?                                                                                                                                                                                                                                                                                         | 6.19<br>2.56 |
| 40 |      |                                                                                                                                                                                                                                                                                                                                                                                        |              |
| 41 | =111 | Does the perception that the causes of obesity relate to matters of personal responsibility motivate people to control their own weight?                                                                                                                                                                                                                                               | 6.19<br>2.49 |
| 42 |      |                                                                                                                                                                                                                                                                                                                                                                                        |              |
| 43 |      |                                                                                                                                                                                                                                                                                                                                                                                        |              |
| 44 | =111 | What are the adverse consequences of bariatric surgery and can these be predicted?                                                                                                                                                                                                                                                                                                     | 6.19<br>2.51 |
| 45 |      |                                                                                                                                                                                                                                                                                                                                                                                        |              |
| 46 |      |                                                                                                                                                                                                                                                                                                                                                                                        |              |
| 47 | 115  | Do marketing campaigns or policy changes affect population mean weight and do these effects differ by baseline weight status (underweight, healthy weight, overweight, obesity)? Do marketing campaigns, policy changes and community interventions prevent weight gain, prompt attempts to lose weight or enhance weight loss in those attempts?                                      | 6.18<br>2.52 |
| 48 |      |                                                                                                                                                                                                                                                                                                                                                                                        |              |
| 49 |      |                                                                                                                                                                                                                                                                                                                                                                                        |              |
| 50 |      |                                                                                                                                                                                                                                                                                                                                                                                        |              |
| 51 | 116  | How effective are interventions to reduce portions in restaurants, café/ food outlets on energy intake and the prevalence of overweight and obesity?                                                                                                                                                                                                                                   | 6.16<br>2.77 |
| 52 |      |                                                                                                                                                                                                                                                                                                                                                                                        |              |
| 53 |      |                                                                                                                                                                                                                                                                                                                                                                                        |              |
| 54 | 117  | Do the prevailing messages about the costs of obesity on healthcare affect prevalence of obesity or bias against people living with overweight?                                                                                                                                                                                                                                        | 6.15<br>2.66 |
| 55 |      |                                                                                                                                                                                                                                                                                                                                                                                        |              |
| 56 |      |                                                                                                                                                                                                                                                                                                                                                                                        |              |
| 57 | 118  | Does the level of naturally occurring sex hormones (testosterone, oestrogen, progesterone) influence bodyweight? Does administering sex hormones lead to weight loss or weight loss maintenance, e.g. Hormone replacement therapy (HRT) , testosterone etc?                                                                                                                            | 6.14<br>2.43 |
| 58 |      |                                                                                                                                                                                                                                                                                                                                                                                        |              |
| 59 |      |                                                                                                                                                                                                                                                                                                                                                                                        |              |
| 60 |      |                                                                                                                                                                                                                                                                                                                                                                                        |              |

|      |                                                                                                                                                                                                                                                                                                                                                                               |              |
|------|-------------------------------------------------------------------------------------------------------------------------------------------------------------------------------------------------------------------------------------------------------------------------------------------------------------------------------------------------------------------------------|--------------|
| 119  | Are high protein diets safe and effective for weight loss and weight loss maintenance?                                                                                                                                                                                                                                                                                        | 6.10<br>2.65 |
| 120  | Does the macronutrient composition of the diet influence the progression of non-alcoholic fatty liver disease (NAFLD) in people living with obesity?                                                                                                                                                                                                                          | 6.06<br>2.53 |
| =121 | What methods are available to measure diet in infants, children, and adolescents and how do they compare in reliability and practicality?                                                                                                                                                                                                                                     | 6.02<br>2.68 |
| =121 | Is the use of commonly prescribed medications (e.g. antibiotics and pain medication) related to weight gain and obesity? What are the effective methods to prevent weight gain and achieve weight loss in people taking medications known to cause weight gain?                                                                                                               | 6.02<br>2.43 |
| 123  | How effective are emerging pharmacological treatments for weight loss and how can we develop new drug treatments to help people lose weight (e.g. appetite suppressants, nutrient absorption etc)?                                                                                                                                                                            | 5.99<br>2.71 |
| 124  | Why do some people with overweight try to lose weight and some people with overweight do not?                                                                                                                                                                                                                                                                                 | 5.98<br>2.64 |
| 125  | Do interventions in the general population to grow food improve weight control?                                                                                                                                                                                                                                                                                               | 5.91<br>2.64 |
| 126  | Does having heavy or irregular periods affect bodyweight?                                                                                                                                                                                                                                                                                                                     | 5.89<br>2.56 |
| =127 | Are total diet replacement programmes (based on energy restricted formula food products) effective, safe, and tolerable for weight management in special populations e.g. attenuation of weight gain in pregnant women or for other groups where rapid weight loss may change outcomes, such as prior to a planned surgery?                                                   | 5.86<br>2.55 |
| =127 | Why do people living with severe obesity eligible for surgery decide not to proceed with the surgery and do they take up other interventions?                                                                                                                                                                                                                                 | 5.86<br>2.55 |
| =127 | Does endorsement or delivery of interventions by different sources enhance the effectiveness of weight loss interventions? E.g. GP referral, celebrity endorsements, social media, family and friends. Does measurement and acknowledgement of body mass index (BMI) by a credible source influence motivation to attempt weight loss or adherence to weight loss programmes? | 5.86<br>2.51 |
| 130  | Is a vegan, vegetarian diet, pescatarian diet or a diet inclusive of meat better for weight loss, weight maintenance and metabolic health?                                                                                                                                                                                                                                    | 5.83<br>2.67 |
| =131 | Has the fat distribution in females changed over time?                                                                                                                                                                                                                                                                                                                        | 5.82<br>2.80 |
| =131 | Does effectiveness of weight loss interventions vary depending on weight status of the individual delivering the intervention?                                                                                                                                                                                                                                                | 5.82<br>2.66 |
| 133  | How do diets with varying macronutrient composition affect adherence to energy restriction?                                                                                                                                                                                                                                                                                   | 5.80<br>2.72 |
| 134  | Do vitamin and mineral deficiencies cause or contribute to weight gain? Do vitamins, minerals and other dietary supplements aid weight loss?                                                                                                                                                                                                                                  | 5.70<br>2.52 |
| 135  | Does variation in gastric capacity explain who does and does not develop obesity?                                                                                                                                                                                                                                                                                             | 5.63<br>2.46 |

|     |                                                                                                                                                                                            |              |
|-----|--------------------------------------------------------------------------------------------------------------------------------------------------------------------------------------------|--------------|
| 136 | Does advice to omit breakfast lead to greater weight loss and better weight maintenance than dietary advice that includes breakfast?                                                       | 5.60<br>2.75 |
| 137 | What is the effectiveness and cost-effectiveness of bariatric surgery for people with type 1 and type 2 diabetes with any degree of overweight but with a body mass index (BMI) $\geq$ 35? | 5.57<br>2.54 |
| 138 | Do concerns about the environment and sustainability affect weight?                                                                                                                        | 5.55<br>2.78 |
| 139 | What is the impact of cookery related television programmes on diet and weight?                                                                                                            | 5.48<br>2.84 |
| 140 | Are people with addictions to drugs and alcohol at greater risk of unhealthy weight gain?                                                                                                  | 5.39<br>2.73 |
| 141 | What are the psychosocial consequences of bariatric surgery for example, on intimate relationships and eating disorders, and do these vary by social and cultural group?                   | 5.32<br>2.45 |
| 142 | What are the methods available to measure adiposity in children? How valid and reliable are these methods?                                                                                 | 5.31<br>2.48 |
| 143 | Does pseudogynaecomastia in men living with obesity influence psychological wellbeing?                                                                                                     | 5.23<br>2.52 |
| 144 | Does autism increase the risk of obesity?                                                                                                                                                  | 5.16<br>2.55 |
| 145 | How does people's perception of air quality affect their engagement in outdoor physical activity and does this influence their weight?                                                     | 4.80<br>2.74 |
| 146 | Does having a liver transplant in childhood or adolescence lead to unhealthy weight gain?                                                                                                  | 4.67<br>2.42 |
| 147 | What is the association between clothing size and body mass index (BMI)?                                                                                                                   | 4.66<br>2.92 |
| 148 | Do 'speciality foods' including genetically modified and organic foods influence total energy intake and hence bodyweight?                                                                 | 4.56<br>2.76 |
| 149 | How does imprisonment affect body weight? What factors influence weight change and obesity during imprisonment?                                                                            | 4.46<br>2.49 |

Mean number of people who ranked each question (SD): 115 (9.7) Mean priority score (SD): 6.61 (2.5)

1  
2  
3  
4  
5  
6  
7  
8  
9  
10  
11  
12  
13  
14  
15  
16  
17  
18  
19  
20  
21  
22  
23  
24  
25  
26  
27  
28  
29  
30  
31  
32  
33  
34  
35  
36  
37  
38  
39  
40  
41  
42  
43  
44  
45  
46  
47  
48  
49  
50  
51  
52  
53  
54  
55  
56  
57  
58  
59  
60

**Supplementary Table 4: Research questions for workshop**

**Survey 2 top 30 debated at the workshop**

1. What are the most effective methods for weight maintenance following weight loss? What are the effective components of treatments/ programmes incorporating a behavioural element? How many and in what combination are most effective? What is the optimal duration of these programmes?
2. What is the cost and affordability of a healthy balanced diet? What policy measures could make healthier foods more affordable? What policy measures could improve access to healthy diets for different social and cultural groups, such as people in poverty, people in inner cities, or young and older people?
3. Does an intervention that focuses on improving overall health rather than a specific focus on weight loss improve health and wellbeing?
4. Does having a psychological disorder such as depression and anxiety affect weight, and, if so, what is the mechanism? How do external perceptions of weight affect mental health? What is the effect of weight loss methods and repeated dieting on mental health outcomes?
5. What are the most effective methods for weight loss? What are the effective components of treatments/ programmes incorporating a behavioural element? How many and in what combination are most effective? What is the optimal duration of these programmes?
6. What is the most effective and cost effective mix of population/ public health and individual interventions to tackle obesity?



7. Do interventions (e.g. nutrition education and physical activity) in pre-school, primary school and secondary school reduce children's risk of unhealthy weight gain and, if so, how do they act? Does the effect of such interventions differ by social and cultural groups?
8. What are the drivers of food choice, appetite, and intake and do variations in these drivers explain who develops obesity and who does not?
9. What are the most effective ways to prompt people to make a weight loss attempt or engage with a weight loss support programme? What are the most effective methods to increase uptake and adherence to programmes?
10. How do demographic, social and cultural factors, e.g. age, socioeconomic status (SES), lifestyle, environment, psychosocial functioning affect weight status, weight gain and regional fat distribution? What are the mechanisms involved? Does the effectiveness of weight loss methods depend on social and cultural background and, if so, can the effects be made more equitable? Are weight loss methods tailored to people's background more effective for weight loss and weight maintenance than general methods?
11. Are people living with obesity at higher risk of infectious diseases? Are they at higher risk of severe consequences from these diseases? What are the proposed mechanisms?
12. Is weight loss an effective treatment for certain medical conditions and chronic illnesses, e.g. polycystic ovary syndrome (PCOS), hypothyroidism, lipaema, gastrointestinal conditions, heart failure, osteoarthritis, chronic pain etc? Should specific weight loss methods be recommended for people with overweight and obesity with certain medical conditions and chronic illnesses?
13. Do parents' attitudes to food influence their children's food intake and risk of obesity?
14. Does the quality or amount of sleep influence bodyweight? Do interventions that increase/ decrease sleep affect weight loss and weight maintenance?
15. In people living with overweight and type 2 diabetes, does losing weight lead to diabetes remission and how long does remission last? What health checks are needed for people who have achieved diabetes remission?
16. Does losing weight and regaining it repeatedly adversely affect long-term health or psychological wellbeing compared with staying at a higher weight the whole time?
17. How do genetic factors, physiological and metabolic processes affect weight status, weight gain and regional fat distribution? What are the mechanisms involved? Do these factors affect the ability to lose and maintain body weight? Do weight loss programmes tailored to a person's genetic makeup or physiology produce greater weight loss than untailored programmes?
18. Do interventions that target the 'obesogenic environment', such as community interventions, urban planning, placement of fast food outlets or workplace policies, affect population mean weight and do these effects differ by baseline weight status (underweight, healthy weight, overweight, obesity)? Which of this type of interventions are most effective at reaching low socio-economic groups?
19. Why do some people struggle to maintain motivation during a weight loss attempt?
20. What are the effects of obesity in childhood on outcomes other than physical health e.g. psychological wellbeing, educational achievement, employment, relationship status etc?
21. Does incorporating physical activity into weight loss interventions enhance weight loss? Does this depend upon the frequency and type of physical activity (e.g. high vs low intensity, resistance vs cardiorespiratory activity)?
22. What effect do working hours (e.g. shift work) and/ or a late eating pattern have on body weight and adiposity?
23. Does being physically active mitigate the health consequences of overweight/obesity?

24. Does prolonged psychological stress affect bodyweight? Do interventions that aim to reduce stress increase weight loss in people living with overweight and obesity compared with interventions not addressing stress?
25. Do interventions that address emotional or social overeating lead to weight loss or weight loss maintenance?
26. What is the relationship between emotions and appetite or energy intake?
27. What changes in supermarkets or the wider food industry are effective in promoting healthier diets? Does changing labelling and/or packaging on foods affect purchasing, consumption and body weight?
28. Do interventions in primary care prevent obesity? What are the effects of offering weight management referrals on the prevalence of obesity?
29. How accurate are existing models of the health consequences of excess weight and the impact of weight loss? Which assumptions are critical in determining the long-term effectiveness and cost-effectiveness of weight loss interventions? What is the impact of weight regain on the incidence of disease and cost-effectiveness of weight loss interventions in these models?
30. How does the brain control food intake and can we use knowledge of these mechanisms to aid weight loss? What are the brain responses to food during weight loss and following weight regain?

**Research questions asked by more than 10 people in the first survey – emailed to workshop participants**

1. What are the effects of interventions to influence health professionals to support patients with overweight and obesity?
2. Does the gut microbiome have an effect on weight gain or the risk of obesity? Does the gut microbiome influence body composition or fat distribution? Do human genetics influence the gut microbiome? Can a change in gut microbiome aid weight loss and by what mechanisms? Which strains of bacteria are associated with greatest weight loss during a weight loss attempt? What is the effect of prebiotics or probiotics on weight loss/weight maintenance?
3. Is there a difference in the way that health professionals respond to patients living with obesity compared with people of a healthy weight in terms of investigation, diagnosis and follow up?
4. What are the most effective treatments for obesity in people with severe mental illness? Is integrating weight management into mental healthcare effective in supporting weight loss or weight loss maintenance?
5. Does the mode of delivery e.g. in-person face-to-face, group, digital, telephone influence the weight loss achieved by a weight loss programme?
6. How do the words used to define and describe overweight and obesity affect perceived discrimination as well as emotional and psychological wellbeing in people living with overweight and obesity? Would changing the language reduce the blame culture associated with obesity? What language used in public health messaging about overweight/obesity encourages weight control without increasing stigma towards people living with obesity?
7. What are the advantages and disadvantages of the various methods of quantifying body fat in routine healthcare? What is the association between these measures and risk of obesity-related health outcomes? What are the most appropriate classifications for overweight and obesity in different demographic groups, e.g. ethnicity, age, gender? Can we develop an easy measurement for 'Thin on Outside, Fat on Inside' for use in routine healthcare? What is the association between being 'Thin on Outside, Fat on Inside' and other obesity related outcomes?

- 1
  - 2
  - 3
  - 4
  - 5
  - 6
  - 7
  - 8
  - 9
  - 10
  - 11
  - 12
  - 13
  - 14
  - 15
  - 16
  - 17
  - 18
  - 19
  - 20
  - 21
  - 22
  - 23
  - 24
  - 25
  - 26
  - 27
  - 28
  - 29
  - 30
  - 31
  - 32
  - 33
  - 34
  - 35
  - 36
  - 37
  - 38
  - 39
  - 40
  - 41
  - 42
  - 43
  - 44
  - 45
  - 46
  - 47
  - 48
  - 49
  - 50
  - 51
  - 52
  - 53
  - 54
  - 55
  - 56
  - 57
  - 58
  - 59
  - 60
8. Is attempting to follow intermittent fasting (including 5:2, every other day diet, etc.) or time restricted eating (e.g. 16:8 or eating between specific hours of the day) effective for weight loss and weight maintenance? Is intermittent fasting or time restricted eating more effective than calorie restriction alone? Are the benefits from intermittent fasting or time restricted eating (e.g. metabolic health, general wellbeing) independent from weight loss? Are there any side effects or health risks from intermittent fasting or time restricted eating?
9. Do people crave or become addicted to certain foods and, if so does this cause obesity? Can treatments reduce pica, food cravings or addiction?
10. Do interventions, including clinical follow-up, after bariatric surgery prevent weight regain? What are the adverse consequences of bariatric surgery and can these be predicted? Why do people living with severe obesity eligible for surgery decide not to proceed with the surgery and do they take up other interventions? What are the psychosocial consequences of bariatric surgery for example, on intimate relationships and eating disorders, and do these vary by social and cultural group?
